# Supplementary material for: Single-Cell Transcriptional Profiling Reveals Sex and Age Diversity of Gene Expression in Mouse Endothelial Cells
Source: Front Genet. 2021 Feb 17;12:590377. doi: 10.3389/fgene.2021.590377 (PMC7929607; doi:10.3389/fgene.2021.590377)
Supplement: Supplementary Table 2 — Organ-specific gene signatures. [file Table_2.XLSX]

## Sheet: 3 mo
Supplemental Table 2. Differential expression of genes in females and males at 3 months
	p_val	avg_logFC	pct.1	pct.2	p_val_adj	female	male
H2-Ab1	1.32325e-14	-1.2953	0.34	0.468	3.0301e-10	2.39557	1.10026
Ppp1r16b	8.8977e-62	-1.21839	0.653	0.753	2.03748e-57	2.21341	0.995027
Tmem100	2.05928e-32	-1.2094	0.184	0.351	4.71556e-28	2.43233	1.22293
Hilpda	8.26846e-18	-1.12051	0.189	0.303	1.89339e-13	1.8965	0.775986
H2-Aa	3.13849e-09	-1.08306	0.289	0.38	7.18683e-05	1.94135	0.858288
Dpysl2	5.95969e-53	-1.0694	0.851	0.901	1.36471e-48	2.77314	1.70373
Sod1	9.59264e-134	-1.01196	0.942	0.969	2.19662e-129	2.32987	1.31791
Arglu1	1.78819e-117	-0.968285	0.819	0.897	4.09478e-113	1.69129	0.723006
Cd74	3.82475e-08	-0.892353	0.363	0.457	0.00087583	1.9814	1.08905
H2-Eb1	7.24277e-06	-0.863874	0.225	0.291	0.165852	1.42596	0.56209
4921513D23Rik	7.9863e-50	-0.828159	0.58	0.73	1.82878e-45	1.49963	0.671476
Ece1	7.67314e-40	-0.814254	0.844	0.885	1.75707e-35	2.73996	1.92571
Zfp187	2.1317e-57	-0.810212	0.609	0.747	4.88138e-53	1.66771	0.857498
Slc39a1	1.30964e-62	-0.797379	0.769	0.855	2.99894e-58	1.43632	0.638944
Dusp3	2.17464e-56	-0.795275	0.89	0.925	4.97971e-52	2.45415	1.65887
Klf13	7.49008e-29	-0.790219	0.892	0.899	1.71515e-24	2.33994	1.54972
BC028528	1.05336e-27	-0.78186	0.446	0.563	2.41209e-23	1.88596	1.1041
Gnb1	8.79945e-38	-0.749867	0.984	0.976	2.01499e-33	2.84851	2.09864
Lrrc8a	1.47213e-37	-0.747852	0.835	0.86	3.37103e-33	1.94923	1.20137
Ptrf	6.03466e-46	-0.731625	0.888	0.946	1.38188e-41	3.25534	2.52372
Tspan8	1.68094e-11	-0.728009	0.086	0.159	3.84919e-07	1.03038	0.302369
Wtap	3.18782e-51	-0.70745	0.571	0.743	7.29978e-47	1.22785	0.520396
Icam2	9.52719e-17	-0.701527	0.745	0.753	2.18163e-12	2.49582	1.7943
C330006A16Rik	8.12538e-19	-0.688439	0.581	0.661	1.86063e-14	1.74477	1.05633
Crip2	1.8646e-21	-0.678933	0.908	0.931	4.26974e-17	2.99404	2.31511
Gm2a	6.47844e-08	-0.670689	0.369	0.44	0.0014835	1.16445	0.493759
B4galt1	4.19036e-25	-0.630666	0.545	0.643	9.59551e-21	1.34751	0.716842
5430417L22Rik	4.23308e-11	-0.627059	0.252	0.335	9.69332e-07	1.22007	0.593006
Mfap2	7.95094e-10	-0.598798	0.122	0.196	1.82069e-05	1.00857	0.409773
Hspa1a	0.193656	-0.588536	0.447	0.45	1	2.121	1.53246
Tsix	3.43756e-161	-0.579493	0.002	0.322	7.87166e-157	0.579732	0.000239494
Nras	5.18352e-24	-0.572847	0.637	0.708	1.18697e-19	1.74814	1.1753
Tubb5	1.75673e-28	-0.564999	0.857	0.869	4.02273e-24	2.0689	1.5039
Set	1.14009e-23	-0.547139	0.72	0.76	2.6107e-19	1.40174	0.854596
4933434E20Rik	5.37474e-13	-0.540662	0.316	0.409	1.23076e-08	1.16049	0.619826
Cst3	4.64832e-08	-0.538569	0.99	0.991	0.00106442	2.97799	2.43942
H2-K1	1.00128e-12	-0.532609	0.962	0.972	2.29284e-08	3.65322	3.12061
Mkl2	2.05418e-10	-0.531023	0.554	0.583	4.70387e-06	1.62005	1.08903
Itpripl1	1.58236e-08	-0.53066	0.417	0.472	0.000362345	1.55508	1.02442
Srsf2	3.72354e-19	-0.529485	0.847	0.873	8.52653e-15	2.16366	1.63417
Snrpb	3.10468e-17	-0.528148	0.765	0.778	7.10942e-13	1.9079	1.37976
Slc9a3r2	4.0065e-22	-0.526042	0.879	0.894	9.17449e-18	2.79719	2.27115
Twf1	2.07624e-16	-0.522517	0.537	0.607	4.75438e-12	1.46145	0.938931
Egfl7	1.06627e-20	-0.522049	0.881	0.886	2.44166e-16	2.65611	2.13406
Ssr1	2.95398e-22	-0.520754	0.666	0.722	6.76432e-18	1.62133	1.10058
Pan3	6.49046e-27	-0.520242	0.612	0.695	1.48625e-22	1.05357	0.533328
Myl12b	1.55279e-32	-0.516511	0.895	0.895	3.55573e-28	2.14782	1.63131
Pltp	2.49159e-07	-0.516198	0.653	0.697	0.0057055	2.76098	2.24478
Sdc4	3.82084e-24	-0.513829	0.336	0.521	8.74933e-20	0.824908	0.311079
H2-D1	2.49211e-15	-0.512512	0.99	0.99	5.70668e-11	4.35175	3.83924
Ncoa3	2.0234e-20	-0.509739	0.633	0.695	4.63337e-16	1.42841	0.91867
Rps25	4.2077e-78	-0.509402	0.903	0.92	9.63521e-74	1.42473	0.915332
Ifit1	0.00769328	-0.508963	0.212	0.243	1	1.42044	0.911476
Gadd45g	0.0953871	-0.507291	0.38	0.382	1	1.46346	0.95617
Lsp1	0.00617319	-0.505603	0.117	0.149	1	0.570052	0.0644482
Ubb	1.88963e-60	-0.504233	0.989	0.991	4.32706e-56	2.60644	2.10221
Plec	1.94269e-08	-0.503589	0.678	0.687	0.000444856	1.86198	1.35839
Dhrs3	0.00579494	-0.500816	0.677	0.694	1	2.44306	1.94225
Clec2d	2.61708e-16	-0.49705	0.57	0.622	5.99286e-12	1.13899	0.64194
Gstm1	9.31413e-09	-0.496301	0.761	0.814	0.000213284	2.11017	1.61387
Actr2	6.25314e-45	-0.493279	0.787	0.843	1.43191e-40	1.40032	0.907039
Cd9	3.50002e-14	-0.489404	0.667	0.767	8.01469e-10	2.29467	1.80527
Xist	2.33072e-109	-0.48828	0.013	0.256	5.33712e-105	0.489528	0.00124803
H2-DMa	0.000206163	-0.487191	0.1	0.142	1	0.735559	0.248368
Kdelr2	3.91058e-36	-0.486152	0.713	0.811	8.95483e-32	1.44353	0.957379
Dctn4	1.64901e-30	-0.485809	0.495	0.615	3.77607e-26	1.06466	0.578854
Alkbh5	3.34081e-38	-0.481416	0.623	0.76	7.65013e-34	1.16435	0.68293
Car2	9.58842e-05	-0.47954	0.248	0.285	1	0.808444	0.328904
Cbx3	4.31289e-73	-0.479085	0.569	0.781	9.87609e-69	0.787352	0.308267
Abcg1	0.00328892	-0.475605	0.376	0.387	1	1.04886	0.573253
Stmn1	7.81044e-16	-0.471637	0.353	0.448	1.78851e-11	1.00103	0.52939
Cldn5	6.08252e-08	-0.46793	0.718	0.727	0.00139284	3.21329	2.74536
Tspan13	7.65422e-33	-0.467019	0.762	0.893	1.75274e-28	2.55977	2.09275
Gata3	4.44694e-28	-0.46595	0.075	0.203	1.0183e-23	0.583372	0.117423
Ripply3	0.000196708	-0.465717	0.248	0.288	1	1.2069	0.741182
Wfdc1	2.85067e-10	-0.465427	0.287	0.372	6.52775e-06	1.7574	1.29197
Tspo	2.27699e-11	-0.464496	0.722	0.749	5.21408e-07	1.91746	1.45297
Plaur	0.00426546	-0.462354	0.31	0.347	1	1.30741	0.845059
Ptp4a2	6.59129e-20	-0.460982	0.759	0.786	1.50934e-15	1.64862	1.18764
Cd93	6.90212e-10	-0.456347	0.804	0.8	1.58052e-05	2.49053	2.03418
Pcnp	1.53919e-28	-0.45575	0.605	0.694	3.52459e-24	1.25685	0.801102
Ramp2	0.0497718	-0.454882	0.887	0.823	1	2.4825	2.02762
Gatad1	8.78996e-12	-0.453524	0.489	0.534	2.01281e-07	0.992019	0.538496
Ly6a	1.33079e-07	-0.450102	0.879	0.899	0.00304736	3.4551	3.00499
Gbas	2.88523e-21	-0.449075	0.375	0.488	6.60688e-17	0.865733	0.416658
H2-DMb1	2.99536e-07	-0.446472	0.078	0.132	0.00685907	0.681633	0.235161
S100a16	1.09009e-10	-0.44613	0.771	0.768	2.4962e-06	1.89921	1.45308
Ecscr	1.14316e-08	-0.442453	0.592	0.616	0.000261773	1.82221	1.37976
Tmem176a	1.34005e-05	-0.440797	0.35	0.411	0.306857	1.45436	1.01357
Stmn2	2.39268e-09	-0.440103	0.209	0.29	5.47899e-05	1.24243	0.802323
Inpp4a	2.25418e-08	-0.439028	0.377	0.425	0.000516185	0.958657	0.519629
Jag1	8.60183e-15	-0.438944	0.379	0.476	1.96973e-10	1.01554	0.576592
D0H4S114	0.0203546	-0.438174	0.459	0.443	1	1.1617	0.723521
Acot2	7.52721e-16	-0.432079	0.18	0.287	1.72366e-11	0.686914	0.254835
Sept2	2.55196e-26	-0.431386	0.876	0.902	5.84374e-22	2.18611	1.75473
Psmb8	7.41859e-07	-0.43106	0.643	0.651	0.0169878	1.65287	1.22181
Klhl9	2.55201e-23	-0.428901	0.455	0.586	5.84384e-19	1.06104	0.632139
Rps18	1.30909e-33	-0.427227	0.925	0.923	2.99768e-29	1.78672	1.3595
Eif5a	1.00399e-23	-0.425328	0.79	0.825	2.29904e-19	1.77557	1.35024
Sat1	1.16372e-05	-0.424889	0.695	0.715	0.266479	2.07075	1.64587
Id3	4.90493e-13	-0.424392	0.885	0.887	1.12318e-08	2.60957	2.18518
Ccdc6	7.07493e-08	-0.422365	0.222	0.293	0.00162009	0.849568	0.427203
Plvap	4.47144e-08	-0.419865	0.362	0.44	0.00102392	2.81409	2.39423
Hs3st1	2.71305e-07	-0.418646	0.185	0.251	0.00621261	1.0447	0.626058
Gna11	4.87991e-07	-0.418358	0.66	0.675	0.0111745	1.85903	1.44068
Rpl6	1.27624e-33	-0.418121	0.792	0.807	2.92246e-29	1.35058	0.932455
Skil	2.72846e-25	-0.418108	0.499	0.63	6.2479e-21	1.15723	0.739119
Lysmd2	4.97726e-10	-0.411115	0.287	0.366	1.13974e-05	1.06562	0.654503
Pfdn1	6.01246e-07	-0.409505	0.348	0.39	0.0137679	0.877602	0.468097
Irf1	0.925339	-0.409174	0.587	0.547	1	2.17196	1.76278
Tm4sf1	1.5304e-08	-0.407243	0.853	0.864	0.000350446	2.92524	2.518
Hpgd	0.00026557	-0.405696	0.2	0.248	1	1.89644	1.49074
Igtp	0.0165138	-0.403537	0.326	0.338	1	1.17849	0.77495
2310046O06Rik	2.18297e-06	-0.402833	0.279	0.339	0.0499879	1.08864	0.685809
Ppp1ca	1.94208e-07	-0.401505	0.768	0.759	0.00444716	1.90855	1.50704
Rrn3	5.82234e-13	-0.400912	0.231	0.329	1.33326e-08	0.726332	0.32542
Ier2	1.68432e-07	-0.400891	0.816	0.838	0.00385691	2.33914	1.93825
Kdm6b	1.91136e-38	-0.398936	0.625	0.756	4.37683e-34	0.985443	0.586507
Pllp	7.85555e-13	-0.398401	0.297	0.4	1.79884e-08	1.3054	0.907
Rtp4	0.000146946	-0.398106	0.389	0.418	1	1.34883	0.950719
Spry2	1.00201e-11	-0.396802	0.351	0.427	2.29451e-07	0.612228	0.215426
Atp5e	2.06792e-19	-0.39542	0.726	0.722	4.73532e-15	1.01664	0.621215
Dusp1	8.05842e-06	-0.395281	0.943	0.95	0.18453	3.37882	2.98354
Foxp1	7.68196e-12	-0.394401	0.681	0.739	1.75909e-07	1.54178	1.14738
Anxa2	6.39549e-11	-0.392857	0.82	0.849	1.4645e-06	2.2893	1.89644
Gltp	3.84671e-13	-0.389349	0.374	0.481	8.80858e-09	1.14939	0.760038
Lyrm4	8.90937e-10	-0.388567	0.166	0.24	2.04016e-05	0.610645	0.222078
Ctla2a	3.42818e-10	-0.388515	0.73	0.735	7.85018e-06	2.09335	1.70484
Mn1	0.000516041	-0.385619	0.174	0.217	1	0.883405	0.497786
Ttyh2	0.00358364	-0.384832	0.234	0.26	1	0.88597	0.501138
Rpl41	8.07317e-49	-0.384755	0.985	0.98	1.84868e-44	1.78311	1.39836
Gsk3b	3.62383e-15	-0.384596	0.742	0.767	8.29821e-11	1.47465	1.09006
Nfia	3.32209e-33	-0.384401	0.691	0.799	7.60725e-29	1.16003	0.775627
Rps7	3.55112e-39	-0.381506	0.865	0.869	8.13171e-35	1.33108	0.949574
Grtp1	9.15978e-20	-0.38103	0.044	0.131	2.0975e-15	0.452349	0.0713188
Psmb9	1.14036e-06	-0.380612	0.456	0.485	0.0261131	1.15317	0.77256
Efnb2	0.00491413	-0.379695	0.429	0.444	1	1.27411	0.894413
Serpinb1a	1.39985e-05	-0.379059	0.145	0.198	0.320552	0.653487	0.274428
Malat1	1.81987e-05	-0.378787	0.996	0.997	0.416731	4.63557	4.25678
Dnajc8	2.2987e-14	-0.377729	0.55	0.613	5.2638e-10	1.09776	0.720034
Rps14	2.10638e-45	-0.377327	0.963	0.971	4.8234e-41	1.98364	1.60632
Lxn	0.00309818	-0.37603	0.261	0.288	1	0.928035	0.552005
Nudt3	0.00572918	-0.37456	0.52	0.493	1	0.967818	0.593257
Tomm7	9.53733e-15	-0.374063	0.638	0.665	2.18395e-10	0.992475	0.618412
Ost4	1.54841e-16	-0.373169	0.701	0.692	3.5457e-12	1.1507	0.777535
Ap2a2	5.53494e-11	-0.368921	0.55	0.594	1.26745e-06	0.997665	0.628744
Wdr61	9.19701e-07	-0.367897	0.278	0.338	0.0210602	0.881474	0.513576
Nedd8	2.83533e-15	-0.366898	0.609	0.652	6.49263e-11	1.13749	0.770588
Rpl38	1.76342e-22	-0.366716	0.845	0.853	4.03806e-18	1.13204	0.765321
Dad1	1.40462e-13	-0.366165	0.708	0.719	3.21644e-09	1.37775	1.01159
Clic1	5.90861e-12	-0.366018	0.789	0.797	1.35301e-07	1.8299	1.46388
Rpl35	3.69956e-52	-0.364574	0.89	0.9	8.47161e-48	1.14891	0.784332
Rps29	8.70229e-62	-0.362199	0.978	0.977	1.99274e-57	1.25456	0.892365
Slc25a5	1.41379e-05	-0.36191	0.81	0.813	0.323744	2.02596	1.66405
Tmem50a	2.11767e-10	-0.361692	0.781	0.78	4.84926e-06	1.77495	1.41325
Rps19	8.90013e-53	-0.361036	0.945	0.953	2.03804e-48	1.67264	1.31161
Ppm1h	0.00211681	-0.360939	0.327	0.353	1	0.923602	0.562664
Dyrk1a	0.000574808	-0.360889	0.271	0.303	1	0.689592	0.328704
Ndufa4	1.00666e-17	-0.359402	0.768	0.767	2.30514e-13	1.27981	0.920413
Bet1l	0.000801702	-0.359241	0.196	0.232	1	0.671354	0.312113
Myct1	3.97864e-08	-0.357196	0.543	0.564	0.00091107	1.39552	1.03832
Hmbs	0.219283	-0.35704	0.151	0.162	1	0.768633	0.411593
H2-Q6	8.09023e-06	-0.356417	0.336	0.386	0.185258	1.30305	0.946635
Fmo1	0.000370964	-0.356023	0.464	0.491	1	1.81637	1.46035
Ptma	3.71033e-59	-0.354782	0.968	0.959	8.49628e-55	1.75693	1.40215
Cetn3	4.9165e-05	-0.354023	0.456	0.462	1	1.03709	0.683064
Hist1h2bc	4.7186e-09	-0.3538	0.411	0.465	0.000108051	1.00254	0.648745
Rpl11	3.65209e-30	-0.351702	0.774	0.783	8.36291e-26	1.15994	0.808235
Cox17	3.01189e-13	-0.351364	0.567	0.594	6.89693e-09	0.888958	0.537595
D17H6S53E	3.0353e-12	-0.350979	0.187	0.277	6.95052e-08	0.542231	0.191251
Naaa	5.43198e-05	-0.3504	0.094	0.138	1	0.567185	0.216786
Car4	0.000292755	-0.348407	0.459	0.496	1	2.27759	1.92919
Klf4	4.63001e-10	-0.346872	0.772	0.787	1.06023e-05	1.75434	1.40746
Cox7c	7.4223e-17	-0.346522	0.783	0.765	1.69963e-12	0.902899	0.556378
Ndufa3	3.02287e-15	-0.34641	0.698	0.716	6.92206e-11	0.956489	0.610078
Acvrl1	8.50791e-07	-0.346148	0.649	0.691	0.0194823	2.22937	1.88322
Park7	3.0234e-10	-0.345992	0.574	0.608	6.92328e-06	1.23408	0.888087
Myl12a	1.03818e-19	-0.345637	0.935	0.934	2.37734e-15	2.34558	1.99995
Ier3	5.68902e-05	-0.344135	0.519	0.564	1	2.03618	1.69205
Wrb	7.34431e-06	-0.343945	0.109	0.159	0.168177	0.625044	0.2811
Sh3bgrl3	0.00223425	-0.342672	0.793	0.75	1	1.56196	1.21929
Guk1	5.97559e-05	-0.342219	0.308	0.349	1	1.03633	0.694106
Rpl36	1.32321e-39	-0.340972	0.923	0.917	3.03001e-35	1.29324	0.952263
Ndufa8	5.43581e-14	-0.340625	0.57	0.62	1.24475e-09	1.27197	0.931349
Mrps33	3.21486e-08	-0.340168	0.351	0.408	0.000736171	0.761505	0.421337
Sub1	1.54687e-13	-0.339392	0.644	0.689	3.54218e-09	1.1228	0.783409
Ddhd2	6.63058e-07	-0.339339	0.212	0.276	0.0151834	0.662708	0.323369
Rps27	1.47372e-34	-0.337889	0.892	0.902	3.37468e-30	0.963483	0.625594
1500032L24Rik	4.45464e-12	-0.337427	0.603	0.627	1.02007e-07	1.09934	0.761916
2010003O02Rik	0.0711919	-0.336885	0.195	0.208	1	0.571358	0.234473
Rpl14	1.81508e-18	-0.33536	0.884	0.851	4.15634e-14	1.52112	1.18576
Adam10	3.53663e-14	-0.33454	0.725	0.748	8.09852e-10	1.4444	1.10986
Atp5k	8.64635e-11	-0.334498	0.601	0.622	1.97993e-06	0.740768	0.40627
0610010K14Rik	6.58588e-06	-0.334327	0.38	0.42	0.15081	0.901361	0.567034
Efna1	0.0734415	-0.332657	0.425	0.42	1	1.44696	1.11431
Fam165b	1.90115e-07	-0.331713	0.365	0.413	0.00435344	0.792347	0.460633
Tsn	1.58579e-11	-0.331674	0.431	0.517	3.6313e-07	1.02578	0.694102
Ndufb4	1.25323e-12	-0.331461	0.546	0.586	2.86977e-08	0.794246	0.462786
Edf1	1.37546e-13	-0.330429	0.687	0.684	3.14967e-09	1.25867	0.928242
Prkab1	1.60333e-05	-0.330277	0.266	0.32	0.367146	0.914173	0.583896
D8Ertd738e	4.50806e-12	-0.330276	0.637	0.653	1.0323e-07	1.19675	0.866477
Eif3g	7.72938e-05	-0.329962	0.525	0.529	1	1.16417	0.834205
Srgn	1.62805e-11	-0.328323	0.819	0.82	3.72807e-07	2.00802	1.67969
Psmf1	0.00118042	-0.327816	0.153	0.19	1	0.67154	0.343724
Rpl27a	4.64262e-21	-0.327175	0.826	0.822	1.06311e-16	1.13273	0.805553
6330512M04Rik	4.8239e-06	-0.327119	0.088	0.135	0.110462	0.593718	0.266598
1810037I17Rik	7.8618e-15	-0.326792	0.664	0.702	1.80027e-10	1.22153	0.894739
Dennd5b	0.00178411	-0.326749	0.442	0.443	1	1.1521	0.825353
Cyp4b1	0.628203	-0.326159	0.513	0.487	1	2.80867	2.48251
Rpl13	3.38042e-31	-0.326124	0.96	0.945	7.74083e-27	1.89171	1.56559
Lsm7	7.44949e-08	-0.3261	0.297	0.364	0.00170586	0.65784	0.33174
Rplp0	2.2519e-06	-0.324981	0.958	0.944	0.0515663	2.29187	1.96688
Ddah2	0.00329684	-0.324963	0.405	0.416	1	1.11468	0.789715
Psme2	1.94633e-05	-0.32468	0.714	0.683	0.44569	1.4217	1.09702
Crip1	7.01448e-19	-0.324408	0.749	0.795	1.60625e-14	1.53471	1.21031
Nop10	2.11064e-10	-0.324258	0.458	0.506	4.83315e-06	0.860217	0.53596
Atp5l	2.84997e-19	-0.324228	0.751	0.76	6.52615e-15	0.865605	0.541377
Elovl1	0.000394307	-0.324043	0.42	0.457	1	1.29465	0.970603
Tbca	7.49127e-07	-0.323967	0.431	0.472	0.0171542	0.77666	0.452693
Plscr1	2.5456e-05	-0.323675	0.292	0.342	0.582916	1.04525	0.721578
Anapc13	6.5925e-07	-0.323555	0.304	0.359	0.0150962	0.598637	0.275082
Ddah1	4.72426e-05	-0.323044	0.213	0.268	1	0.989864	0.66682
Ngdn	1.68563e-06	-0.322828	0.235	0.292	0.0385993	0.743459	0.42063
Map1lc3b	1.32085e-07	-0.322664	0.792	0.765	0.00302462	1.89381	1.57114
Rpl37a	1.9374e-49	-0.322569	0.958	0.945	4.43644e-45	1.33478	1.01221
Nfkbia	5.17492e-07	-0.322385	0.921	0.927	0.01185	2.93178	2.6094
Pde4b	9.76089e-11	-0.322349	0.448	0.547	2.23515e-06	1.54179	1.21944
Iqgap1	2.28948e-25	-0.322201	0.799	0.855	5.24268e-21	1.67475	1.35255
Pfn1	1.55424e-20	-0.322142	0.922	0.909	3.55906e-16	1.72562	1.40348
Selk	1.33522e-22	-0.322094	0.814	0.834	3.05753e-18	1.60027	1.27817
Rps26	3.03554e-24	-0.321974	0.8	0.802	6.95107e-20	0.98637	0.664396
Tspan7	0.00236403	-0.321529	0.589	0.61	1	2.39982	2.07829
Mrpl4	0.000276845	-0.321413	0.381	0.402	1	1.02772	0.706308
Sbds	1.77725e-08	-0.32134	0.59	0.623	0.000406972	1.36335	1.04201
Trappc4	2.02258e-05	-0.320575	0.369	0.411	0.463151	1.02468	0.704103
Pdrg1	0.00128476	-0.320506	0.27	0.3	1	0.884934	0.564428
2900053A13Rik	0.0004083	-0.32029	0.332	0.359	1	0.563278	0.242988
Psmb2	1.71252e-11	-0.320261	0.577	0.62	3.92149e-07	1.28263	0.962371
Spin1	0.00119426	-0.31941	0.361	0.383	1	0.85813	0.53872
Uqcrb	1.59379e-15	-0.319191	0.777	0.757	3.64963e-11	1.27582	0.956627
Ndufa6	3.86682e-14	-0.318626	0.673	0.682	8.85464e-10	1.05212	0.733489
Rps27l	9.07174e-12	-0.316818	0.639	0.643	2.07734e-07	0.986873	0.670055
Rpl9	2.40549e-23	-0.316625	0.913	0.89	5.50833e-19	1.58058	1.26395
AI462493	0.000309632	-0.315986	0.252	0.291	1	0.737099	0.421113
Prr13	6.72101e-08	-0.315112	0.529	0.555	0.00153904	1.03659	0.721474
Rps6	4.57012e-34	-0.314764	0.851	0.856	1.04651e-29	1.28939	0.974621
Casp6	5.20134e-07	-0.314295	0.187	0.251	0.0119106	0.811931	0.497635
Ndufb6	5.394e-06	-0.314001	0.446	0.473	0.123517	0.908888	0.594887
Nmi	0.00145211	-0.3139	0.366	0.386	1	0.897027	0.583127
Pdcd4	9.57347e-15	-0.31367	0.517	0.587	2.19223e-10	0.704599	0.39093
Cox6c	1.66096e-23	-0.313402	0.832	0.819	3.80342e-19	1.22247	0.909068
Vim	2.51782e-12	-0.313123	0.814	0.856	5.76557e-08	2.32845	2.01532
Snx3	7.78399e-16	-0.312833	0.822	0.821	1.78246e-11	1.83669	1.52386
Sec11a	7.74226e-06	-0.312815	0.393	0.445	0.17729	1.05809	0.745274
Med28	2.5074e-10	-0.312748	0.532	0.588	5.74169e-06	1.19818	0.885432
Rps3a	4.53879e-23	-0.312748	0.877	0.877	1.03934e-18	1.57967	1.26693
Psma7	1.95078e-12	-0.312509	0.753	0.772	4.4671e-08	1.38889	1.07638
Ifitm3	0.022296	-0.312437	0.979	0.96	1	2.82595	2.51351
Rpl17	1.25282e-19	-0.312161	0.859	0.817	2.86882e-15	1.16487	0.85271
Bst2	5.02832e-10	-0.311941	0.742	0.74	1.15144e-05	1.64407	1.33213
Lmna	4.62192e-07	-0.310588	0.624	0.714	0.0105837	1.72939	1.4188
Atox1	5.78448e-13	-0.310398	0.803	0.801	1.32459e-08	1.39572	1.08533
Rpl21	2.87514e-15	-0.310377	0.918	0.878	6.58379e-11	1.4754	1.16502
Pitpnc1	0.00484555	-0.310175	0.749	0.715	1	1.74193	1.43175
Tmco1	0.000743519	-0.30999	0.572	0.56	1	1.17078	0.86079
Ntan1	7.81043e-06	-0.309661	0.369	0.414	0.178851	0.96585	0.65619
1810022K09Rik	3.74938e-08	-0.309093	0.376	0.429	0.00085857	0.648071	0.338978
Slc50a1	4.93968e-05	-0.308915	0.5	0.515	1	1.3051	0.996186
Ssna1	0.000668291	-0.308647	0.323	0.355	1	0.912347	0.6037
Ypel3	9.0795e-08	-0.308565	0.501	0.547	0.00207911	1.07069	0.762126
Fau	1.23562e-28	-0.308181	0.875	0.861	2.82944e-24	1.19249	0.884312
Snrpd3	3.71051e-07	-0.308071	0.433	0.471	0.00849669	0.873186	0.565114
Cox7a2	4.02936e-16	-0.307893	0.727	0.735	9.22683e-12	1.1123	0.804409
Sdhb	0.000743187	-0.307596	0.543	0.564	1	1.24504	0.937446
Clec1a	0.178422	-0.307136	0.38	0.372	1	1.48773	1.18059
Rplp1	1.58911e-29	-0.306941	0.929	0.898	3.63891e-25	1.40591	1.09897
Phlda3	4.76228e-07	-0.306427	0.156	0.221	0.0109051	0.686249	0.379822
Shfm1	2.88591e-18	-0.306221	0.792	0.776	6.60845e-14	1.14376	0.837537
Pde9a	0.000264208	-0.306211	0.074	0.109	1	0.531069	0.224858
Ptges3	1.88773e-18	-0.305878	0.747	0.8	4.32272e-14	1.29744	0.991558
Nol7	0.00209414	-0.305643	0.465	0.462	1	0.857413	0.55177
Lrp4	8.19564e-14	-0.305303	0.084	0.166	1.87672e-09	0.393468	0.0881652
Tm2d3	4.13043e-05	-0.305288	0.203	0.253	0.945827	0.741247	0.435959
Rps28	2.80523e-26	-0.305229	0.902	0.861	6.4237e-22	1.0158	0.710569
Ndufc1	2.03885e-08	-0.304915	0.461	0.503	0.000466875	0.740418	0.435503
Hmgn1	6.13656e-09	-0.304782	0.442	0.502	0.000140521	0.94387	0.639088
Efcab4a	0.0181976	-0.303653	0.497	0.48	1	1.45468	1.15102
Grap	0.00357545	-0.303495	0.455	0.469	1	1.49037	1.18687
Gltscr2	0.0300887	-0.303003	0.657	0.585	1	1.09303	0.790028
Snrnp27	0.000218204	-0.302733	0.372	0.397	1	0.72708	0.424347
Hmgb1	1.6403e-25	-0.302581	0.934	0.912	3.75612e-21	1.70714	1.40456
Commd3	0.00106151	-0.30236	0.309	0.334	1	0.891948	0.589588
Chmp2a	2.38947e-07	-0.302056	0.655	0.648	0.00547164	1.29442	0.992364
Thbd	3.903e-15	-0.300983	0.745	0.788	8.93747e-11	2.2685	1.96752
Ndufa7	4.46496e-14	-0.30086	0.732	0.733	1.02243e-09	1.2745	0.973635
Rps20	5.82315e-20	-0.30079	0.893	0.871	1.33344e-15	1.36311	1.06232
Pfas	9.6886e-07	-0.300305	0.143	0.2	0.0221859	0.521366	0.221062
Pomp	3.7534e-10	-0.299985	0.657	0.669	8.59491e-06	1.34138	1.0414
Psme1	0.000883014	-0.299934	0.701	0.664	1	1.35323	1.0533
2310003F16Rik	3.52932e-10	-0.299182	0.455	0.516	8.08179e-06	0.808287	0.509105
Brp44l	2.45461e-09	-0.298823	0.326	0.392	5.6208e-05	0.719511	0.420688
Rbm15	6.63955e-10	-0.298818	0.293	0.375	1.52039e-05	0.595046	0.296228
Ppp1r11	0.000637219	-0.298634	0.44	0.441	1	0.886351	0.587717
Erdr1	1.60443e-21	-0.297313	0.194	0.329	3.67399e-17	0.434287	0.136974
Selm	3.13792e-05	-0.297193	0.541	0.519	0.718553	0.941278	0.644085
Usmg5	9.1323e-09	-0.297048	0.674	0.669	0.000209121	0.871488	0.57444
Cfl1	1.12462e-29	-0.296704	0.97	0.966	2.57526e-25	1.85465	1.55795
Rpl36a	1.60862e-09	-0.296677	0.676	0.655	3.68358e-05	0.831848	0.535171
Ppdpf	1.00178e-07	-0.296564	0.401	0.455	0.00229398	0.898115	0.601551
Tmem126a	0.00116712	-0.296312	0.33	0.354	1	0.733627	0.437315
Psma2	2.6781e-07	-0.295967	0.603	0.608	0.00613258	1.25245	0.956486
Rplp2	4.47311e-24	-0.295582	0.916	0.864	1.0243e-19	1.13847	0.842885
Ccdc12	7.29307e-05	-0.295529	0.472	0.483	1	1.00769	0.712157
Hnrnpc	2.51007e-11	-0.295013	0.736	0.74	5.7478e-07	1.48358	1.18857
Fkbp1a	0.00011065	-0.29465	0.895	0.859	1	2.27326	1.97861
Gimap1	0.000216926	-0.294627	0.454	0.49	1	1.29671	1.00209
Twf2	0.000192359	-0.294361	0.256	0.302	1	0.839232	0.544871
Dynlrb1	7.79667e-11	-0.29397	0.634	0.648	1.78536e-06	1.14818	0.854212
Mtmr2	2.92698e-17	-0.293902	0.499	0.606	6.7025e-13	1.02377	0.729868
Minos1	2.53179e-09	-0.293663	0.632	0.638	5.79754e-05	1.01434	0.720677
Chchd1	0.000355301	-0.293544	0.265	0.303	1	0.650855	0.357312
Ranbp1	2.56668e-07	-0.293483	0.504	0.529	0.00587745	0.941362	0.647879
Hyal2	0.0305087	-0.293479	0.446	0.446	1	1.63317	1.33969
Trmt112	2.10183e-08	-0.293463	0.386	0.442	0.000481299	0.761895	0.468432
Hbxip	0.00066293	-0.293414	0.492	0.497	1	1.13016	0.836748
Anxa3	4.52643e-06	-0.293365	0.666	0.667	0.103651	1.82375	1.53038
Akr1a1	9.93199e-07	-0.292942	0.85	0.83	0.0227433	2.08144	1.7885
Rpl15	2.82876e-25	-0.29289	0.823	0.831	6.47758e-21	1.30998	1.01709
Snrpd2	8.80874e-07	-0.292886	0.405	0.446	0.0201711	0.731798	0.438912
Dpm3	1.91401e-05	-0.292672	0.411	0.444	0.43829	0.705381	0.412709
Sumo1	1.36186e-09	-0.292626	0.552	0.588	3.11852e-05	1.17681	0.884189
Rps24	7.0901e-23	-0.292559	0.903	0.86	1.62356e-18	1.28691	0.994355
Zic2	0.67565	-0.292549	0.141	0.138	1	0.87868	0.586131
Atp5h	1.34991e-12	-0.292374	0.777	0.754	3.09115e-08	1.26111	0.968737
Rps16	1.24444e-24	-0.292356	0.883	0.851	2.84963e-20	1.28286	0.990504
Stard3nl	0.0012602	-0.292327	0.298	0.329	1	0.920772	0.628446
Ehd4	4.29694e-06	-0.291923	0.479	0.531	0.0983956	1.69461	1.40269
Uqcrq	1.41253e-05	-0.291757	0.662	0.635	0.323455	1.05308	0.761326
Taldo1	2.69774e-05	-0.291537	0.561	0.571	0.617756	1.20485	0.913312
Rdh13	9.86962e-06	-0.291456	0.093	0.141	0.226004	0.509708	0.218252
Rps9	3.41259e-21	-0.291315	0.934	0.912	7.8145e-17	1.7136	1.42229
Bmx	4.84209e-05	-0.291304	0.087	0.13	1	0.701443	0.41014
Tmsb4x	9.41435e-15	-0.291053	0.997	0.998	2.15579e-10	3.2017	2.91064
Rai12	0.43311	-0.290936	0.273	0.267	1	0.886186	0.59525
Map1lc3a	1.51214e-06	-0.290277	0.525	0.544	0.0346265	1.00512	0.714845
Tgtp2	0.00032216	-0.289385	0.403	0.434	1	1.18425	0.894865
Gng11	3.19097e-14	-0.289375	0.852	0.833	7.30701e-10	1.78867	1.4993
Psmb10	0.0122368	-0.288948	0.55	0.545	1	1.37359	1.08464
Hnrnpa0	0.188526	-0.288904	0.587	0.476	1	0.79598	0.507076
Rpl37	4.23298e-29	-0.288635	0.918	0.909	9.6931e-25	1.18568	0.897045
Chrac1	0.00196297	-0.288174	0.269	0.298	1	0.759564	0.47139
Rnf187	1.2613e-06	-0.287695	0.57	0.614	0.0288824	1.41603	1.12834
S1pr4	6.57599e-07	-0.287602	0.151	0.213	0.0150583	0.703765	0.416163
Gas5	2.79188e-07	-0.287402	0.561	0.567	0.00639313	0.865058	0.577656
Rpl32	2.9826e-23	-0.287365	0.904	0.88	6.82986e-19	1.28961	1.00224
Syf2	0.00252043	-0.286436	0.553	0.524	1	1.07869	0.792255
Lgals9	0.223372	-0.286028	0.741	0.681	1	1.87162	1.58559
1810006K21Rik	1.40528e-07	-0.285986	0.468	0.497	0.00321796	0.727453	0.441466
Arpp19	4.91703e-09	-0.285954	0.556	0.594	0.000112595	0.902967	0.617012
1110007C09Rik	3.73943e-06	-0.285778	0.351	0.399	0.0856291	0.870302	0.584524
Tnfrsf10b	1.41424e-05	-0.285696	0.262	0.322	0.323847	0.780199	0.494504
Hn1	0.0181157	-0.285636	0.389	0.403	1	1.00646	0.720824
Ssr2	3.13795e-05	-0.285142	0.484	0.512	0.71856	1.16486	0.879715
Emp2	0.0843038	-0.285038	0.321	0.335	1	1.45544	1.17041
Bad	0.00187946	-0.284777	0.237	0.267	1	0.715073	0.430296
Uqcr10	1.34021e-06	-0.284529	0.632	0.611	0.0306895	0.919724	0.635195
Polr2e	0.000957419	-0.284381	0.422	0.447	1	1.09099	0.806606
Nsg1	0.00011395	-0.284045	0.179	0.227	1	0.825105	0.54106
Ndufa5	5.75579e-08	-0.283842	0.435	0.484	0.00131802	0.767941	0.484099
1500011K16Rik	0.0064108	-0.283663	0.218	0.243	1	0.577284	0.293622
Gnaq	3.17997e-05	-0.283603	0.577	0.609	0.728181	1.32514	1.04154
Mdh2	2.56973e-06	-0.283338	0.661	0.675	0.0588442	1.48744	1.2041
Sec61b	1.61541e-07	-0.283176	0.471	0.497	0.00369914	0.850856	0.56768
Cdv3	0.000152079	-0.283084	0.601	0.611	1	1.19536	0.912273
Vps36	0.00108217	-0.282223	0.31	0.342	1	0.835751	0.553528
Med1	0.000746679	-0.281963	0.44	0.453	1	0.974431	0.692468
Ephx1	0.000595915	-0.281961	0.5	0.519	1	1.48585	1.20389
Pttg1	0.000671151	-0.281782	0.431	0.443	1	0.992018	0.710235
Hsbp1	6.16725e-09	-0.28156	0.606	0.64	0.000141224	1.1758	0.894244
Mrpl27	0.0311191	-0.281527	0.314	0.322	1	0.82218	0.540653
Hmgn2	4.67119e-06	-0.281483	0.419	0.448	0.106966	0.773627	0.492144
Mllt6	0.0520979	-0.28089	0.319	0.323	1	0.764516	0.483626
Ccdc109a	0.00346759	-0.280782	0.21	0.24	1	0.576858	0.296076
Rpl18a	1.85551e-22	-0.280764	0.981	0.978	4.24894e-18	2.15992	1.87915
Rps17	3.46191e-16	-0.280468	0.886	0.85	7.92743e-12	1.30688	1.02642
Atp6v0e2	5.90522e-05	-0.280195	0.124	0.17	1	0.671603	0.391407
Zfp317	6.96178e-08	-0.279157	0.12	0.185	0.00159418	0.521065	0.241908
Whsc1l1	0.180079	-0.278747	0.51	0.486	1	0.960399	0.681653
Ndufb11	1.41806e-07	-0.27858	0.624	0.616	0.00324721	1.05283	0.774253
Ifi35	0.00482468	-0.2785	0.489	0.486	1	1.26077	0.982274
Rbx1	2.02859e-10	-0.27846	0.672	0.684	4.64527e-06	1.26735	0.988886
Snrpg	9.57371e-09	-0.27823	0.631	0.635	0.000219228	0.843431	0.5652
Zcrb1	0.0028957	-0.278119	0.362	0.384	1	0.808688	0.530569
Efha2	0.000124027	-0.278012	0.151	0.194	1	0.478046	0.200033
Ccrl2	3.91058e-05	-0.277942	0.216	0.273	0.895484	0.969337	0.691395
1110003E01Rik	1.20687e-06	-0.277895	0.535	0.566	0.0276362	1.10515	0.827253
Prdx1	6.84289e-10	-0.277763	0.868	0.873	1.56695e-05	1.9253	1.64754
Mrpl33	7.28465e-07	-0.277321	0.458	0.483	0.0166811	0.755682	0.47836
Dnajc19	0.0102806	-0.277201	0.255	0.277	1	0.627445	0.350244
Copz2	0.000592243	-0.276966	0.297	0.328	1	0.874371	0.597405
Calm1	1.06751e-12	-0.276938	0.985	0.983	2.44448e-08	2.74595	2.46901
Shisa5	0.00992921	-0.276928	0.794	0.772	1	1.81198	1.53505
Rps11	1.20356e-15	-0.276922	0.918	0.891	2.75602e-11	1.70082	1.4239
Cops4	0.00010762	-0.276664	0.293	0.345	1	0.899113	0.622449
Npm1	0.000478861	-0.276158	0.701	0.677	1	1.28851	1.01235
H2afv	2.4383e-06	-0.276088	0.498	0.525	0.0558346	1.03071	0.754625
Ifnar1	0.000251908	-0.27599	0.465	0.512	1	1.11144	0.835453
Gnl3l	0.000628445	-0.275935	0.268	0.299	1	0.689459	0.413524
Ndufb8	6.22796e-08	-0.275765	0.562	0.591	0.00142614	1.12269	0.846927
Il2rg	0.0904302	-0.275406	0.424	0.441	1	1.26099	0.985587
Atp6v0e	4.48427e-05	-0.274201	0.591	0.594	1	1.25775	0.98355
Coro1a	0.0248873	-0.273764	0.181	0.214	1	0.368143	0.0943796
Fam195b	0.000473488	-0.273763	0.373	0.41	1	1.01611	0.742344
Sarnp	0.000314537	-0.273625	0.438	0.455	1	0.842999	0.569375
Ankrd33b	3.46441e-07	-0.272627	0.149	0.216	0.00793315	0.710094	0.437467
H2afz	4.97515e-07	-0.272054	0.641	0.642	0.0113926	1.18874	0.916682
Sec61g	3.91441e-07	-0.2715	0.604	0.603	0.0089636	0.784881	0.513381
Psmb6	1.86687e-05	-0.271401	0.63	0.643	0.427493	1.35129	1.07989
1110058L19Rik	0.000328453	-0.271206	0.167	0.207	1	0.61532	0.344114
Rps21	1.42633e-10	-0.270966	0.883	0.833	3.26615e-06	0.939275	0.668309
Vwf	3.13064e-06	-0.270582	0.233	0.302	0.0716886	1.25076	0.980174
Id2	0.000730194	-0.269254	0.491	0.514	1	1.13671	0.867454
Spcs1	4.36611e-05	-0.269043	0.597	0.594	0.999795	1.14029	0.871245
1810027O10Rik	4.75457e-07	-0.268809	0.547	0.567	0.0108875	0.902674	0.633865
Golt1b	0.00709686	-0.268477	0.251	0.282	1	0.745187	0.47671
Dhrs7	0.000346218	-0.268365	0.374	0.407	1	1.02084	0.752475
Ppia	3.04405e-31	-0.268341	0.986	0.975	6.97056e-27	2.07287	1.80453
Carkd	0.0920665	-0.26831	0.246	0.26	1	0.777685	0.509374
Psma3	0.000363645	-0.268005	0.698	0.672	1	1.41465	1.14664
Deb1	2.00614e-05	-0.267901	0.167	0.218	0.459387	0.514107	0.246205
Ndufab1	0.000790058	-0.267814	0.403	0.419	1	0.779613	0.511799
Eif3k	0.000239139	-0.267553	0.582	0.574	1	1.10549	0.837936
D4Wsu53e	9.59876e-05	-0.267401	0.79	0.763	1	1.7206	1.4532
Hint1	1.14419e-08	-0.26733	0.713	0.691	0.000262008	1.11905	0.851722
Otub1	1.41848e-06	-0.267265	0.387	0.448	0.0324818	0.834874	0.567609
Ccdc56	0.000763415	-0.26725	0.416	0.432	1	0.958041	0.690792
4933439F18Rik	0.00395523	-0.266667	0.222	0.251	1	0.604143	0.337477
Atxn1	0.779004	-0.266564	0.414	0.39	1	0.916783	0.650219
Itm2b	0.000460941	-0.266072	0.993	0.995	1	3.57495	3.30887
Rpl35a	2.57353e-12	-0.265945	0.813	0.773	5.89313e-08	0.910747	0.644801
Ndufb2	0.0120938	-0.265784	0.422	0.419	1	0.726439	0.460656
Fxyd5	2.51359e-05	-0.265462	0.662	0.658	0.575588	1.50799	1.24253
Tuba1c	0.206703	-0.265399	0.641	0.662	1	0.969934	0.704536
Txndc17	0.00136078	-0.265227	0.528	0.52	1	1.06045	0.795222
Chchd2	3.47828e-18	-0.265022	0.89	0.883	7.96491e-14	1.72874	1.46372
Pam	1.02026e-33	-0.26496	0.56	0.737	2.3363e-29	1.05977	0.794809
Chchd7	0.000421307	-0.264949	0.259	0.296	1	0.62159	0.356641
Mrfap1	1.8799e-12	-0.264909	0.774	0.785	4.30478e-08	1.57073	1.30582
Mrps14	1.62156e-05	-0.264903	0.38	0.425	0.37132	0.900131	0.635228
Tmem204	0.318267	-0.264883	0.757	0.696	1	2.19401	1.92913
Msrb2	0.212026	-0.264756	0.114	0.123	1	0.589645	0.324889
Atp5j2	4.64764e-10	-0.264719	0.756	0.73	1.06426e-05	1.02453	0.759816
Puf60	0.00276658	-0.264615	0.625	0.615	1	1.38238	1.11776
Snrpe	2.92417e-05	-0.264585	0.431	0.462	0.669607	0.778854	0.514269
Vti1b	0.0167849	-0.26454	0.443	0.44	1	1.00886	0.744324
Spcs2	1.49168e-06	-0.264134	0.552	0.589	0.034158	1.26154	0.997406
Banf1	1.60188e-05	-0.263951	0.557	0.543	0.366814	0.99616	0.73221
Fam181b	0.0547116	-0.263913	0.137	0.155	1	0.759368	0.495455
Pik3c2b	8.05615e-05	-0.263847	0.296	0.343	1	0.693998	0.430151
Foxn3	0.0163822	-0.263704	0.515	0.515	1	1.07157	0.807871
Oaz1	3.7892e-30	-0.263245	0.84	0.873	8.6769e-26	0.946488	0.683244
Tceb2	2.43949e-12	-0.263156	0.8	0.786	5.5862e-08	1.20004	0.936888
Vta1	0.0762634	-0.262998	0.25	0.263	1	0.83397	0.570972
Aurkaip1	0.0519599	-0.262968	0.388	0.384	1	0.864767	0.601799
Ly6e	0.232121	-0.262938	0.962	0.949	1	2.83664	2.5737
Faim	0.0294113	-0.262776	0.201	0.221	1	0.716677	0.453902
Gabarapl2	4.16456e-10	-0.262325	0.673	0.698	9.53643e-06	1.19421	0.931881
Ccdc85b	7.32984e-10	-0.262072	0.622	0.644	1.67846e-05	1.35073	1.08866
Higd1a	8.65991e-06	-0.262055	0.39	0.432	0.198303	0.779873	0.517818
Kars	0.0133457	-0.260934	0.435	0.445	1	1.12227	0.861339
Swi5	1.05215e-06	-0.260639	0.507	0.529	0.0240933	0.928801	0.668162
Gtl3	0.111089	-0.260308	0.277	0.284	1	0.807841	0.547533
Tex261	2.49397e-06	-0.260233	0.354	0.414	0.0571094	0.878859	0.618625
Paip2	1.05233e-05	-0.260002	0.619	0.621	0.240972	1.28914	1.02914
Dynll1	6.62815e-19	-0.259821	0.873	0.869	1.51778e-14	1.80013	1.54031
Alkbh6	0.103219	-0.259777	0.181	0.195	1	0.676822	0.417045
Ddrgk1	0.0699902	-0.259712	0.441	0.42	1	0.923698	0.663986
Rpl10a	1.25304e-09	-0.259687	0.692	0.674	2.86933e-05	0.879088	0.619402
Sox18	0.00330931	-0.259018	0.698	0.674	1	2.05206	1.79304
Rpl7a	0.000152483	-0.257984	0.781	0.719	1	1.2587	1.00072
Ndufs6	0.00921493	-0.257782	0.557	0.524	1	0.91099	0.653208
Tmsb10	8.42819e-21	-0.257576	0.747	0.813	1.92997e-16	0.686415	0.428839
Tubb6	0.130214	-0.257298	0.21	0.24	1	0.928442	0.671144
Dpy30	0.00513356	-0.257092	0.263	0.286	1	0.662032	0.404939
1110004F10Rik	0.00214912	-0.257084	0.422	0.438	1	0.922732	0.665648
Mrpl42	0.0116777	-0.256933	0.324	0.343	1	0.799743	0.54281
Nudt16l1	0.0416831	-0.256359	0.239	0.256	1	0.726744	0.470385
Socs2	0.00529118	-0.255827	0.298	0.324	1	0.906568	0.650741
Gtpbp5	0.0125627	-0.255804	0.092	0.116	1	0.502343	0.246538
Cox5b	6.76511e-12	-0.255675	0.71	0.708	1.54914e-07	1.01129	0.755616
Kdm5c	5.10718e-05	-0.255388	0.2	0.251	1	0.576799	0.321411
Kdsr	3.00506e-06	-0.255249	0.293	0.356	0.0688129	0.757613	0.502364
Atp5g1	2.89258e-06	-0.254984	0.547	0.552	0.0662371	0.875627	0.620643
Rnaseh2c	0.018578	-0.254953	0.309	0.319	1	0.675328	0.420375
Mcmbp	1.07966e-07	-0.254879	0.524	0.576	0.00247231	1.00641	0.751533
Vamp8	2.36701e-05	-0.254829	0.53	0.544	0.542022	1.03063	0.775801
Abhd16a	0.0171164	-0.254819	0.402	0.415	1	1.21807	0.963255
6720456B07Rik	2.18441e-06	-0.254198	0.576	0.603	0.0500208	1.21964	0.965444
Mrpl49	0.000577492	-0.253591	0.138	0.177	1	0.629816	0.376225
Mrpl20	0.00129117	-0.253347	0.365	0.39	1	0.812465	0.559118
Ywhaz	4.60567e-17	-0.25326	0.954	0.925	1.05465e-12	1.8425	1.58924
2510006D16Rik	9.58374e-06	-0.253221	0.483	0.515	0.219458	1.04466	0.791436
Lamtor2	3.75995e-05	-0.252992	0.397	0.423	0.86099	0.765571	0.512579
Tmem9	0.0610323	-0.252842	0.167	0.188	1	0.593448	0.340606
1810035L17Rik	0.017121	-0.252746	0.347	0.352	1	0.65224	0.399494
Sept11	0.0475524	-0.252743	0.506	0.493	1	1.14891	0.896164
Tbrg1	0.177351	-0.2526	0.54	0.494	1	1.04155	0.788952
Uqcr11	1.75873e-07	-0.252562	0.757	0.728	0.00402731	1.23246	0.979897
Ndufa12	0.000334526	-0.252501	0.434	0.446	1	0.752194	0.499693
Rpl18	6.96784e-14	-0.252492	0.884	0.84	1.59557e-09	1.48151	1.22902
Bbip1	0.00176654	-0.252028	0.233	0.268	1	0.613871	0.361844
Cox6b1	1.21926e-10	-0.251937	0.806	0.769	2.79199e-06	1.22952	0.977581
Ndufa1	0.00261118	-0.251837	0.612	0.579	1	0.959419	0.707583
Ccdc72	3.58834e-11	-0.251526	0.555	0.601	8.21695e-07	0.862943	0.611417
Pdzd11	0.00269495	-0.251521	0.208	0.243	1	0.752647	0.501126
4933407H18Rik	0.0690585	-0.251366	0.218	0.235	1	0.627041	0.375675
Cltb	1.78419e-06	-0.251052	0.601	0.612	0.0408562	1.19088	0.93983
Hbegf	0.938179	-0.251011	0.342	0.322	1	1.08229	0.831283
2310016M24Rik	0.000366487	-0.251	0.413	0.432	1	0.834659	0.583659
Rnf7	0.0301404	-0.250899	0.483	0.467	1	1.07121	0.820315
S100a13	4.51075e-06	-0.250702	0.756	0.733	0.103292	1.15526	0.904557
Krtcap2	0.0003701	-0.250582	0.614	0.594	1	1.05605	0.805471
Selplg	4.50515e-14	-0.250523	0.228	0.364	1.03163e-09	0.310177	0.0596537
Capzb	9.36685e-06	-0.250522	0.748	0.744	0.214492	1.62788	1.37735
Ech1	0.00817071	-0.250394	0.579	0.58	1	1.39605	1.14566
Cyb5	1.31285e-07	-0.250393	0.701	0.718	0.0030063	1.60415	1.35376
Mapt	1.20705e-05	-0.249831	0.117	0.168	0.276403	0.526893	0.277062
Cebpd	0.319713	-0.249321	0.627	0.589	1	1.63471	1.38539
Notch2	8.67948e-08	-0.249288	0.213	0.275	0.00198751	0.366037	0.116748
Atp5j	2.01209e-19	-0.248971	0.859	0.866	4.60749e-15	1.57333	1.32436
Tial1	0.0772753	-0.248873	0.32	0.32	1	0.599102	0.35023
Gng5	9.05906e-07	-0.248638	0.853	0.817	0.0207443	1.35622	1.10758
Eef1b2	0.00286034	-0.24861	0.581	0.557	1	0.933072	0.684463
Ndufb5	0.000225376	-0.248449	0.439	0.462	1	0.908612	0.660163
Psmb1	2.60104e-06	-0.248417	0.686	0.679	0.0595612	1.34481	1.09639
Fam96b	0.00414282	-0.248361	0.331	0.353	1	0.751333	0.502971
Bcap31	0.000150579	-0.248309	0.632	0.635	1	1.44661	1.1983
Ubl5	8.29908e-06	-0.248245	0.656	0.638	0.190041	0.926947	0.678702
Rpl4	1.02061e-11	-0.248032	0.902	0.889	2.3371e-07	1.98018	1.73215
Mpv17	0.169639	-0.247911	0.329	0.33	1	0.997946	0.750034
Mrps24	0.000333266	-0.247672	0.409	0.437	1	0.832908	0.585237
Mrpl53	0.00238081	-0.247538	0.259	0.287	1	0.625778	0.378239
Myef2	5.26201e-10	-0.247431	0.328	0.413	1.20495e-05	0.659128	0.411698
Calm2	1.50891e-11	-0.24721	0.907	0.904	3.45524e-07	2.11367	1.86646
Tgtp1	0.00103986	-0.24713	0.27	0.315	1	1.04462	0.797491
Smagp	0.0192267	-0.246874	0.464	0.451	1	1.06094	0.814068
Sepw1	5.70593e-17	-0.246051	0.854	0.848	1.3066e-12	1.36221	1.11616
Atp6v1g1	4.98442e-06	-0.245916	0.656	0.653	0.114138	1.31592	1.07
Rpl24	1.38621e-08	-0.245875	0.838	0.76	0.000317428	1.1472	0.901322
Arpc3	1.12887e-11	-0.245741	0.812	0.805	2.58499e-07	1.52946	1.28372
Rnaset2b	1.22879e-11	-0.245708	0.667	0.694	2.8138e-07	0.751576	0.505868
Snrpf	0.00263972	-0.245293	0.429	0.433	1	0.610083	0.36479
Txn1	1.03835e-08	-0.245286	0.802	0.751	0.000237771	1.29432	1.04903
Cox16	0.0058149	-0.245238	0.283	0.307	1	0.605196	0.359958
Vdac3	0.0365572	-0.245166	0.524	0.506	1	1.14602	0.900851
Mier1	0.256528	-0.245068	0.521	0.484	1	0.95006	0.704992
AI314976	0.0012858	-0.244846	0.145	0.184	1	0.603599	0.358753
Magoh	0.0288678	-0.244777	0.345	0.345	1	0.709914	0.465137
Emg1	4.01111e-05	-0.244318	0.303	0.351	0.918503	0.793029	0.548711
Ndufa13	1.02317e-05	-0.244273	0.641	0.619	0.234295	0.94572	0.701446
Ndufb3	0.00276056	-0.244222	0.496	0.483	1	0.853334	0.609112
2900010M23Rik	0.0563389	-0.244195	0.465	0.453	1	0.823393	0.579198
Bub3	0.00155154	-0.243858	0.427	0.448	1	1.09698	0.853126
Rpl3	2.26467e-05	-0.243011	0.878	0.837	0.518587	1.77201	1.529
Brp44	0.000959406	-0.242898	0.359	0.378	1	0.714587	0.471689
Ciapin1	0.0734505	-0.242897	0.172	0.189	1	0.677261	0.434364
Rpl13a	8.36148e-16	-0.242889	0.917	0.894	1.9147e-11	1.22696	0.984067
Prkrip1	0.331642	-0.242312	0.132	0.138	1	0.475242	0.23293
Psenen	1.61928e-05	-0.241926	0.499	0.521	0.370798	0.822097	0.580171
Cxcl1	0.000222751	-0.241649	0.178	0.238	1	0.994262	0.752612
Tspan17	0.0598923	-0.241496	0.207	0.224	1	0.833909	0.592414
Rdm1	0.00156647	-0.241473	0.177	0.213	1	0.722874	0.481401
Mrps18c	0.00630878	-0.241429	0.342	0.365	1	0.722447	0.481018
Pin1	8.57798e-06	-0.241309	0.307	0.365	0.196427	0.81714	0.575832
Car5a	0.105458	-0.241177	0.097	0.112	1	1.00861	0.767435
Sumo2	1.78117e-11	-0.241155	0.709	0.72	4.0787e-07	0.954512	0.713357
Rpl34-ps1	4.34078e-22	-0.241149	0.773	0.793	9.93996e-18	0.875983	0.634834
Pmp22	0.00461437	-0.240938	0.514	0.546	1	1.60493	1.36399
Cbx1	0.00283586	-0.240806	0.458	0.463	1	0.871956	0.631149
Pfdn4	0.118159	-0.240354	0.12	0.134	1	0.39827	0.157915
Tmem176b	0.103743	-0.240114	0.545	0.567	1	1.79038	1.55026
Ndufa2	4.80237e-05	-0.239793	0.643	0.627	1	1.0078	0.768006
1700040I03Rik	0.037119	-0.239755	0.1	0.121	1	0.559261	0.319506
Mrps21	0.000168566	-0.239515	0.447	0.471	1	0.757715	0.5182
Gm1821	2.41935e-55	-0.239475	0.979	0.982	5.54006e-51	1.3902	1.15072
Pgpep1	0.0170999	-0.239449	0.182	0.21	1	0.628865	0.389417
Fibp	0.824948	-0.239079	0.206	0.196	1	0.650911	0.411832
9430023L20Rik	0.133614	-0.239055	0.248	0.259	1	0.801556	0.562501
Lyrm2	0.000115158	-0.238849	0.164	0.212	1	0.519947	0.281099
Dnaja1	2.02985e-06	-0.238831	0.804	0.79	0.0464816	1.56441	1.32558
Ccdc124	0.00115147	-0.2386	0.373	0.397	1	0.829779	0.591179
Cdc26	0.000705745	-0.238413	0.261	0.299	1	0.696848	0.458435
2810008D09Rik	1.78544e-05	-0.238364	0.107	0.154	0.408847	0.419303	0.180938
Pdcl3	3.04294e-05	-0.238179	0.341	0.389	0.696804	0.852438	0.614259
Serf2	4.23956e-12	-0.238017	0.894	0.865	9.70817e-08	1.25201	1.01399
Mapk1ip1l	2.68861e-10	-0.237751	0.331	0.42	6.15664e-06	0.699944	0.462193
Cadm1	0.00251801	-0.237456	0.152	0.187	1	0.59662	0.359164
Nosip	0.0505871	-0.237273	0.354	0.365	1	0.899686	0.662413
Mrpl1	0.00731235	-0.236864	0.092	0.12	1	0.451695	0.214831
Arl6ip5	4.86349e-13	-0.236604	0.649	0.69	1.11369e-08	1.29472	1.05812
Commd6	0.000390998	-0.236476	0.229	0.271	1	0.607205	0.37073
Timm17a	0.00110346	-0.236361	0.353	0.379	1	0.877184	0.640823
Iscu	0.000160827	-0.236288	0.441	0.467	1	0.989299	0.75301
Fam118b	0.0597797	-0.235953	0.149	0.166	1	0.663859	0.427906
Rrp36	0.0652327	-0.23592	0.175	0.191	1	0.648039	0.412119
Arl4a	0.0111672	-0.235888	0.539	0.529	1	1.44289	1.20701
Rnf125	0.24069	-0.235583	0.418	0.408	1	1.37091	1.13533
Slc25a4	0.000152142	-0.235541	0.694	0.683	1	1.40684	1.1713
Psmc3	0.119755	-0.235419	0.615	0.572	1	1.24767	1.01225
Mrpl32	0.000592222	-0.235062	0.21	0.247	1	0.572552	0.33749
Uqcrc1	0.0375755	-0.234688	0.617	0.623	1	1.48146	1.24677
Rps27a	3.17953e-08	-0.234647	0.847	0.792	0.00072808	1.24501	1.01036
Trex1	0.0948605	-0.234494	0.257	0.221	1	0.863748	0.629254
Rpl23a	1.94371e-16	-0.23415	0.868	0.844	4.4509e-12	1.09426	0.860114
Fadd	0.0014606	-0.233536	0.115	0.149	1	0.429746	0.196209
Dctn5	0.201984	-0.233514	0.344	0.344	1	0.902356	0.668841
Unc50	0.246626	-0.233475	0.367	0.36	1	1.00995	0.776474
Tmed9	0.00678533	-0.233454	0.613	0.594	1	1.20323	0.969781
Gtf2h5	0.0834901	-0.233343	0.341	0.338	1	0.692925	0.459582
Nsfl1c	0.360634	-0.233156	0.376	0.356	1	0.910274	0.677118
Btg1	6.77664e-05	-0.233112	0.703	0.747	1	1.41249	1.17938
Snrpa1	0.00181303	-0.233098	0.189	0.225	1	0.608416	0.375318
Vmp1	0.00909069	-0.232873	0.316	0.346	1	0.752414	0.519541
Zcchc17	0.698471	-0.232708	0.251	0.24	1	0.705306	0.472599
Lsmd1	0.00168708	-0.232625	0.363	0.384	1	0.686648	0.454023
Arl6ip4	0.294685	-0.232532	0.208	0.207	1	0.588838	0.356306
Syngr2	0.635412	-0.232524	0.472	0.451	1	1.16299	0.930463
Rpl26	8.53797e-05	-0.232477	0.27	0.317	1	0.473038	0.240561
Calcrl	0.000299171	-0.232448	0.651	0.647	1	1.90329	1.67084
Ccdc59	0.187989	-0.232444	0.334	0.326	1	0.703909	0.471465
Spag7	0.103409	-0.231899	0.368	0.369	1	0.938176	0.706277
Cnnm4	0.0516596	-0.23182	0.169	0.192	1	0.556366	0.324546
Psmg4	0.0532972	-0.231814	0.203	0.218	1	0.505168	0.273355
Selenbp1	4.67919e-05	-0.231759	0.13	0.18	1	0.571263	0.339504
Fkbp3	0.0240565	-0.231715	0.421	0.417	1	0.776126	0.544411
Nkd1	8.14584e-05	-0.231519	0.254	0.31	1	1.16371	0.932194
Rnf167	0.00533146	-0.231516	0.416	0.445	1	1.09072	0.859208
Pop5	0.00474331	-0.231366	0.309	0.335	1	0.876721	0.645355
Cycs	1.90828e-08	-0.231274	0.576	0.597	0.000436976	0.90121	0.669935
Ednrb	0.778854	-0.230724	0.36	0.336	1	1.59054	1.35982
Sdhd	0.0459302	-0.230509	0.372	0.371	1	0.924533	0.694024
Polr2g	0.0061604	-0.230243	0.318	0.34	1	0.771596	0.541353
Uqcrh	5.17505e-05	-0.230194	0.675	0.638	1	0.989357	0.759162
Gnl3	0.607538	-0.230051	0.201	0.187	1	0.477923	0.247873
Hsf2	1.83907e-16	-0.230001	0.159	0.268	4.21129e-12	0.406428	0.176427
Ing5	0.456458	-0.229834	0.15	0.134	1	0.519202	0.289368
LOC545261	0.740463	-0.229333	0.39	0.36	1	1.1509	0.921562
2010107E04Rik	0.0979638	-0.22915	0.491	0.461	1	0.713035	0.483886
Ddx56	0.10074	-0.229115	0.115	0.133	1	0.53916	0.310045
Ifi47	0.199881	-0.229044	0.264	0.27	1	1.05933	0.830289
Nostrin	0.213905	-0.228961	0.459	0.436	1	1.38176	1.1528
Rps8	0.000124045	-0.228615	0.916	0.843	1	1.18698	0.958364
2610001J05Rik	0.00458405	-0.228383	0.38	0.399	1	0.907916	0.679533
BC031181	0.00540572	-0.228245	0.478	0.476	1	0.999726	0.771481
Prr15	3.68883e-12	-0.228228	0.041	0.102	8.44705e-08	0.336166	0.107938
Rab8a	0.00683728	-0.227571	0.385	0.4	1	0.887487	0.659916
2700007P21Rik	0.00337599	-0.227371	0.182	0.219	1	0.585816	0.358445
Phb2	0.0938995	-0.227336	0.36	0.362	1	0.851021	0.623684
Rps15	1.18659e-09	-0.227246	0.872	0.816	2.71717e-05	1.13895	0.911708
Mrpl28	0.0124321	-0.227186	0.249	0.276	1	0.735518	0.508332
Pycr2	0.0437748	-0.22717	0.194	0.212	1	0.656913	0.429743
Spr	0.0168207	-0.227128	0.353	0.367	1	0.861822	0.634694
Ndufs7	0.108772	-0.226549	0.546	0.522	1	1.13386	0.907315
Klhdc5	0.000630198	-0.226503	0.077	0.111	1	0.422959	0.196456
Rpl39	0.000750994	-0.226419	0.758	0.69	1	0.743355	0.516936
0610037L13Rik	0.0173271	-0.226404	0.318	0.34	1	0.812499	0.586095
Rps5	0.00148123	-0.22627	0.871	0.834	1	1.64621	1.41994
Tmem85	0.000112901	-0.226268	0.325	0.372	1	0.832549	0.606281
Sec62	6.73608e-10	-0.226143	0.803	0.805	1.5425e-05	1.15083	0.924684
Cdr2l	0.0460674	-0.225895	0.214	0.177	1	0.744818	0.518923
Cnbp	6.25232e-10	-0.225779	0.895	0.904	1.43172e-05	2.16651	1.94073
Cdkn1b	5.63452e-30	-0.225619	0.514	0.696	1.29025e-25	0.754226	0.528607
Gtf2a2	0.0106584	-0.225258	0.375	0.388	1	0.847866	0.622607
Tapbp	4.55739e-09	-0.225241	0.8	0.839	0.00010436	1.86842	1.64318
U2af1	0.0232648	-0.225078	0.353	0.361	1	0.618954	0.393876
Higd2a	0.0119151	-0.22498	0.559	0.53	1	1.0067	0.781719
Tmem127	0.0163455	-0.224821	0.435	0.372	1	0.883036	0.658216
Romo1	0.0963613	-0.22457	0.576	0.525	1	0.794926	0.570356
Maff	0.00842405	-0.224381	0.218	0.169	1	0.445325	0.220945
Tmem109	0.0174534	-0.22413	0.594	0.582	1	1.39916	1.17503
Dguok	0.0258665	-0.224111	0.252	0.273	1	0.723365	0.499255
Sec13	0.00918046	-0.223781	0.44	0.46	1	1.16414	0.940361
Slc25a17	5.27467e-05	-0.223763	0.175	0.226	1	0.635905	0.412141
Srp19	0.365644	-0.223301	0.336	0.326	1	0.700443	0.477143
Rqcd1	0.256273	-0.223019	0.194	0.204	1	0.612565	0.389547
Cetn2	0.0121375	-0.222841	0.283	0.304	1	0.693452	0.470611
Necap2	0.654395	-0.222764	0.344	0.323	1	0.920631	0.697867
2610002J02Rik	0.123844	-0.22269	0.176	0.187	1	0.600113	0.377423
0610009D07Rik	0.0433561	-0.222542	0.397	0.386	1	0.770737	0.548195
Fam162a	0.00126018	-0.222541	0.287	0.316	1	0.628977	0.406436
Pcp4l1	9.42445e-06	-0.222197	0.398	0.462	0.215811	1.58022	1.35803
Polr2k	0.000544968	-0.222136	0.302	0.338	1	0.5987	0.376564
Cox8a	2.68601e-09	-0.221824	0.833	0.782	6.1507e-05	1.25182	1.02999
Arpc4	0.00223088	-0.221696	0.682	0.658	1	1.2617	1.04
Npdc1	0.0783969	-0.22158	0.477	0.466	1	1.21333	0.991747
Pfdn5	2.3438e-07	-0.221439	0.731	0.703	0.00536708	1.19633	0.974888
2810002N01Rik	0.537535	-0.221373	0.25	0.244	1	0.657213	0.435839
Pam16	0.21564	-0.220667	0.237	0.24	1	0.58751	0.366844
Scamp3	0.394334	-0.220604	0.344	0.337	1	0.862177	0.641574
Agpat4	0.106324	-0.220412	0.238	0.253	1	0.785066	0.564654
Bloc1s1	0.00104782	-0.220328	0.504	0.499	1	0.815089	0.594761
Mrpl36	0.124005	-0.219853	0.28	0.283	1	0.694933	0.47508
Rassf1	0.362123	-0.21981	0.503	0.444	1	1.25617	1.03636
Ndufs4	0.048441	-0.21966	0.442	0.434	1	0.818115	0.598455
1110038F14Rik	0.588377	-0.219296	0.308	0.273	1	0.705592	0.486296
B2m	5.84803e-06	-0.219289	0.991	0.992	0.133914	3.41083	3.19154
2700060E02Rik	0.290199	-0.219289	0.51	0.464	1	1.01589	0.796598
Snapc5	0.939767	-0.219121	0.293	0.27	1	0.700661	0.48154
Adrb2	0.000419092	-0.21878	0.278	0.331	1	1.15124	0.932458
Commd4	0.101942	-0.218687	0.208	0.223	1	0.640635	0.421948
Lsm6	6.16468e-05	-0.218349	0.284	0.337	1	0.711034	0.492685
Mrpl34	0.198927	-0.218086	0.235	0.238	1	0.603203	0.385118
E330033B04Rik	0.263907	-0.217671	0.12	0.104	1	0.526923	0.309252
Psma6	0.0490089	-0.217637	0.617	0.585	1	1.29943	1.08179
1810063B07Rik	0.632817	-0.217624	0.233	0.223	1	0.722581	0.504957
Sra1	0.333051	-0.217521	0.34	0.329	1	0.795072	0.577551
Fam32a	0.0327714	-0.217118	0.44	0.447	1	1.05818	0.841058
Ppie	0.0378206	-0.217009	0.185	0.205	1	0.60369	0.386681
Ccdc23	0.150663	-0.21695	0.27	0.271	1	0.578972	0.362022
Phb	0.000157061	-0.216897	0.337	0.373	1	0.769012	0.552115
Ict1	0.0310686	-0.216784	0.222	0.243	1	0.574146	0.357363
Tmem59	1.75143e-08	-0.216778	0.87	0.872	0.00040106	2.02675	1.80997
Lsm4	0.025061	-0.216712	0.322	0.332	1	0.693149	0.476437
Pdlim1	0.446254	-0.216654	0.441	0.442	1	1.56994	1.35328
Snrpb2	0.0915737	-0.216572	0.295	0.308	1	0.565187	0.348615
Arl2	0.0317438	-0.216486	0.216	0.235	1	0.614337	0.397852
Rdx	0.00339237	-0.216483	0.708	0.69	1	1.49114	1.27466
H2afj	0.0493427	-0.216483	0.385	0.385	1	0.615298	0.398815
Kat5	0.00182027	-0.216369	0.12	0.156	1	0.559245	0.342876
Gstm2	0.108197	-0.216063	0.326	0.335	1	0.898342	0.682279
Gemin7	0.0372305	-0.215783	0.439	0.434	1	1.01413	0.798343
Prkag1	0.0850676	-0.215328	0.27	0.283	1	0.872756	0.657428
Etfb	0.138702	-0.21514	0.537	0.503	1	1.07451	0.859366
Arl4d	0.501378	-0.215049	0.345	0.33	1	1.10383	0.888778
0610037P05Rik	0.161739	-0.215004	0.224	0.233	1	0.66189	0.446886
Cops8	0.0802124	-0.214806	0.366	0.368	1	0.923566	0.708761
Rpl7	1.02107e-11	-0.214716	0.902	0.888	2.33816e-07	1.72065	1.50594
Psmd12	0.183641	-0.214662	0.405	0.397	1	0.892611	0.677949
0610007P14Rik	0.00160405	-0.214301	0.164	0.204	1	0.489719	0.275417
Tuba1a	0.000329067	-0.214287	0.814	0.835	1	2.07314	1.85885
Rps4x	8.06479e-07	-0.214134	0.837	0.788	0.0184676	1.48881	1.27468
Polr2i	0.465021	-0.214096	0.288	0.281	1	0.617299	0.403203
Grcc10	0.000413185	-0.213851	0.663	0.629	1	1.06953	0.855683
Fbxo6	0.289628	-0.213643	0.274	0.272	1	0.831144	0.617501
Txndc15	0.000274625	-0.213397	0.294	0.341	1	0.814749	0.601352
AI597468	0.00453402	-0.213302	0.26	0.293	1	0.668218	0.454916
Mrps18a	0.0217169	-0.213207	0.25	0.274	1	0.647415	0.434207
Mrpl51	0.00309928	-0.213181	0.305	0.333	1	0.704422	0.491241
Psmc2	0.0826363	-0.213131	0.408	0.408	1	0.999893	0.786761
Rexo2	0.00470179	-0.212935	0.455	0.459	1	0.910161	0.697226
0610031J06Rik	0.0667755	-0.212864	0.526	0.512	1	1.27129	1.05842
D19Ertd737e	0.0550264	-0.212815	0.183	0.199	1	0.509408	0.296593
Myzap	0.139838	-0.212699	0.286	0.296	1	1.03061	0.817915
Tomm40	0.0227864	-0.212669	0.22	0.244	1	0.655161	0.442492
H2afy	0.530736	-0.212528	0.581	0.53	1	0.983278	0.77075
Naca	7.87306e-07	-0.212418	0.779	0.76	0.0180285	1.24719	1.03478
Rsl24d1	6.13125e-14	-0.212412	0.225	0.343	1.404e-09	0.587125	0.374713
Trim37	0.00734778	-0.212405	0.454	0.458	1	0.863354	0.650948
Bambi	0.790839	-0.212239	0.232	0.224	1	0.854065	0.641826
Scnm1	0.556992	-0.212209	0.192	0.19	1	0.560763	0.348554
Mrps11	0.757746	-0.212077	0.166	0.161	1	0.54244	0.330362
Rpl27	6.729e-14	-0.21207	0.837	0.799	1.54087e-09	1.08252	0.870451
Phpt1	0.00040518	-0.211881	0.216	0.256	1	0.513218	0.301336
Erh	3.87958e-05	-0.211657	0.444	0.47	0.888384	0.721208	0.509551
Cdc123	0.00347919	-0.211601	0.219	0.256	1	0.614437	0.402835
Ly6c1	3.0994e-12	-0.211574	0.813	0.894	7.09731e-08	3.43033	3.21876
Rabac1	0.00354496	-0.211554	0.826	0.779	1	1.64155	1.42999
H2-T23	0.000669775	-0.211418	0.801	0.794	1	1.93529	1.72387
Tecr	0.285903	-0.211282	0.445	0.436	1	0.94583	0.734549
Cbfa2t3	0.0266711	-0.211131	0.596	0.583	1	1.04534	0.834208
Pdlim3	2.01604e-06	-0.211018	0.08	0.131	0.0461654	0.540496	0.329477
Tmem159	0.0517116	-0.210938	0.196	0.215	1	0.665788	0.45485
Dap	0.0812071	-0.210917	0.301	0.32	1	0.794914	0.583997
Runx1t1	1.30486e-05	-0.210709	0.145	0.201	0.298799	0.553144	0.342435
Akap13	0.0828096	-0.210686	0.55	0.471	1	1.12663	0.915949
S100a1	0.0251565	-0.21068	0.556	0.543	1	1.06877	0.858087
Prdm16	0.00941942	-0.210611	0.214	0.253	1	0.957483	0.746872
1810046J19Rik	0.0251443	-0.210381	0.274	0.289	1	0.638062	0.427682
Denr	0.369565	-0.210344	0.308	0.297	1	0.605061	0.394717
Pqlc1	0.00792243	-0.210103	0.264	0.296	1	0.896081	0.685978
Pin4	0.000141369	-0.210095	0.21	0.255	1	0.506903	0.296808
Manbal	0.00244148	-0.210021	0.193	0.227	1	0.547247	0.337226
Maf1	0.162962	-0.209951	0.448	0.447	1	1.08302	0.873065
Kazald1	0.000116381	-0.209938	0.096	0.14	1	0.508422	0.298484
Actb	0.827982	-0.209859	1	1	1	3.98563	3.77577
Acy3	0.164865	-0.209789	0.106	0.087	1	0.507158	0.297369
Esd	0.049488	-0.209783	0.453	0.447	1	0.916603	0.706821
Chmp5	0.050945	-0.20977	0.567	0.541	1	1.14626	0.936495
H3f3b	3.48061e-10	-0.209714	0.959	0.962	7.97026e-06	2.57463	2.36491
Aip	0.30436	-0.209428	0.399	0.392	1	1.01321	0.803785
Bola2	0.0026763	-0.209412	0.285	0.311	1	0.526529	0.317117
Rpl28	2.29401e-06	-0.209344	0.842	0.809	0.0525305	1.01355	0.804203
Nudt9	0.643962	-0.20908	0.295	0.278	1	0.80444	0.59536
1110038B12Rik	0.134971	-0.208858	0.112	0.128	1	0.437328	0.22847
Bsg	8.08324e-09	-0.208786	0.869	0.859	0.000185098	1.93755	1.72876
Tmbim4	0.47661	-0.20877	0.494	0.466	1	1.09944	0.890668
Mrps16	0.0580637	-0.208708	0.25	0.263	1	0.604211	0.395503
Rpl7l1	7.06618e-05	-0.208381	0.297	0.344	1	0.777339	0.568958
Brd8	0.877412	-0.208241	0.332	0.31	1	0.705358	0.497117
Pstk	0.0144301	-0.208236	0.079	0.101	1	0.388558	0.180323
Cox4i1	4.64323e-06	-0.208104	0.924	0.882	0.106325	1.7904	1.58229
Mrp63	0.000560024	-0.208074	0.263	0.306	1	0.597824	0.38975
Mrpl52	0.383488	-0.208021	0.418	0.383	1	0.572349	0.364328
Psmc1	0.245849	-0.208018	0.545	0.515	1	1.11943	0.911411
Lsm5	0.0177013	-0.207994	0.217	0.238	1	0.431239	0.223245
2310009A05Rik	0.00650991	-0.207943	0.161	0.19	1	0.453743	0.2458
Tprgl	0.0131782	-0.207643	0.701	0.705	1	1.72131	1.51367
Cfdp1	0.555399	-0.207636	0.455	0.414	1	0.795395	0.587759
2410016O06Rik	7.11589e-08	-0.207392	0.085	0.146	0.00162947	0.49623	0.288838
Polr2d	0.00759816	-0.207245	0.182	0.21	1	0.611	0.403754
Tagln2	0.024632	-0.207076	0.903	0.886	1	2.46006	2.25298
Gpx1	0.174215	-0.207012	0.838	0.787	1	1.90535	1.69834
Foxn2	0.0058726	-0.2069	0.269	0.3	1	0.589689	0.382788
Mrpl37	0.891098	-0.206805	0.194	0.183	1	0.627163	0.420358
Clpp	0.120608	-0.206652	0.237	0.252	1	0.728972	0.52232
Tbcb	0.160224	-0.2066	0.427	0.417	1	0.98881	0.78221
Mxra7	0.178136	-0.206505	0.382	0.385	1	0.95251	0.746006
Nsd1	0.0145156	-0.206494	0.466	0.384	1	0.906379	0.699885
Mphosph8	0.569245	-0.206102	0.244	0.219	1	0.59201	0.385908
Plscr2	0.329281	-0.205891	0.246	0.252	1	1.0898	0.883906
Rbm42	0.223863	-0.205742	0.5	0.473	1	1.11244	0.906703
Med10	0.168354	-0.205713	0.319	0.319	1	0.778339	0.572626
Tpra1	0.61582	-0.205111	0.305	0.292	1	0.951974	0.746863
Rps15a	6.10688e-05	-0.205101	0.721	0.662	1	0.821967	0.616866
Ebna1bp2	0.0396554	-0.205083	0.285	0.301	1	0.721968	0.516885
Napa	0.083333	-0.204895	0.439	0.45	1	1.15211	0.947218
Ndufaf3	0.809132	-0.20481	0.212	0.205	1	0.660681	0.455871
Hmcn1	0.00172991	-0.204697	0.349	0.386	1	0.998147	0.79345
Thoc7	0.50965	-0.204684	0.301	0.29	1	0.536896	0.332211
Stra13	0.043031	-0.20461	0.306	0.318	1	0.613817	0.409207
Ahsa1	0.00138363	-0.204038	0.325	0.365	1	0.871336	0.667298
Bccip	0.00637532	-0.203977	0.265	0.295	1	0.701548	0.497571
Bckdk	0.461816	-0.203966	0.216	0.218	1	0.725733	0.521767
Thoc3	0.0106138	-0.203829	0.139	0.169	1	0.555259	0.351429
Uba52	3.69812e-12	-0.203809	0.922	0.856	8.46831e-08	1.12569	0.921879
Taf12	0.085338	-0.203721	0.205	0.219	1	0.634242	0.430521
Hsd17b12	0.596056	-0.203447	0.345	0.331	1	0.89344	0.689992
Id1	0.00596211	-0.203399	0.705	0.682	1	1.86256	1.65916
Atp5c1	0.0491377	-0.203354	0.672	0.653	1	1.36552	1.16216
Pxmp3	0.0295684	-0.203134	0.154	0.177	1	0.565844	0.36271
Cct5	0.0749804	-0.203097	0.555	0.55	1	1.17132	0.96822
Tsc22d1	4.64955e-05	-0.202677	0.787	0.794	1	2.30221	2.09954
D14Ertd668e	0.78153	-0.202675	0.279	0.269	1	0.901371	0.698696
Ssbp1	0.0102744	-0.202628	0.181	0.212	1	0.457322	0.254694
Mrpl10	0.66999	-0.202615	0.209	0.205	1	0.593765	0.39115
Usp22	0.625635	-0.202529	0.322	0.295	1	0.806448	0.603919
Dcps	0.0564509	-0.202437	0.189	0.208	1	0.608978	0.406541
D17Wsu104e	0.288463	-0.202398	0.376	0.366	1	0.879606	0.677208
Impact	0.108396	-0.202313	0.245	0.26	1	0.656158	0.453845
Irf8	0.638174	-0.202247	0.168	0.161	1	0.518869	0.316622
Ndufs5	0.0370783	-0.20216	0.447	0.447	1	0.669658	0.467498
Psmc4	0.131908	-0.202077	0.404	0.401	1	0.972789	0.770712
Trnau1ap	0.598122	-0.201979	0.296	0.287	1	0.802433	0.600454
Rpp30	0.0143171	-0.201809	0.112	0.137	1	0.44619	0.244381
Polr1c	0.175666	-0.201615	0.148	0.163	1	0.544583	0.342968
Bmyc	0.0853037	-0.201574	0.208	0.219	1	0.522425	0.320851
5133401N09Rik	0.000946159	-0.201532	0.288	0.321	1	0.634367	0.432835
Ndufv3	0.32147	-0.201165	0.482	0.451	1	0.777317	0.576152
Sfr1	0.400644	-0.201162	0.538	0.489	1	0.979131	0.777969
Grpel1	0.105109	-0.20113	0.364	0.364	1	0.837471	0.636342
Mrpl38	0.00416085	-0.200964	0.18	0.213	1	0.538209	0.337245
Dock1	0.0125236	-0.200934	0.478	0.383	1	0.987312	0.786378
Cdkn2d	0.0151619	-0.200799	0.173	0.201	1	0.592279	0.391481
Herpud1	0.991437	-0.20073	0.564	0.527	1	1.29534	1.09461
Cyba	0.0669127	-0.20063	0.621	0.594	1	0.97608	0.77545
Zfp780b	0.00138735	-0.20042	0.121	0.157	1	0.446224	0.245804
Arf1	0.00141404	-0.200307	0.87	0.847	1	1.98428	1.78398
Psma1	0.189865	-0.20014	0.498	0.489	1	1.18815	0.988007
Acd	0.216607	-0.199996	0.142	0.153	1	0.539029	0.339033
Chsy1	0.0059195	-0.19998	0.167	0.197	1	0.415048	0.215068
1700123O20Rik	0.102062	-0.199631	0.253	0.263	1	0.708643	0.509012
Cox7a2l	0.0252494	-0.199573	0.555	0.538	1	1.03036	0.83079
Aamp	0.037791	-0.199569	0.514	0.511	1	1.0989	0.899328
Bnip3l	7.03283e-06	-0.199281	0.658	0.662	0.161045	1.28981	1.09053
Znrf3	0.481337	-0.199241	0.166	0.168	1	0.510904	0.311663
Tomm6	2.3668e-07	-0.199221	0.624	0.644	0.00541974	0.687038	0.487818
Utp11l	0.759772	-0.19914	0.28	0.267	1	0.596773	0.397633
Ndufb10	0.00147604	-0.199125	0.603	0.584	1	1.00822	0.809097
Tceb1	4.83967e-05	-0.199105	0.472	0.503	1	0.733076	0.533971
Atp5o	0.0780481	-0.199093	0.646	0.599	1	1.05201	0.852913
Ralbp1	0.0165707	-0.199084	0.541	0.531	1	0.928683	0.729599
Commd1	0.0788173	-0.199053	0.416	0.401	1	0.87444	0.675387
Tmbim1	0.105752	-0.199023	0.539	0.527	1	1.31045	1.11143
Atp5f1	0.000249184	-0.199016	0.634	0.639	1	1.27803	1.07901
Pmvk	0.193436	-0.198923	0.126	0.137	1	0.513011	0.314088
Tmem11	0.0637258	-0.198866	0.262	0.279	1	0.731001	0.532135
Eif3m	0.753639	-0.198831	0.469	0.434	1	0.957673	0.758842
Rbm26	9.0139e-05	-0.198678	0.432	0.458	1	0.658052	0.459374
Vps72	0.0935244	-0.198545	0.303	0.309	1	0.705593	0.507049
Zfp637	0.499592	-0.198498	0.173	0.176	1	0.615674	0.417177
Acaa1a	0.616812	-0.198399	0.379	0.361	1	0.936955	0.738557
Eif6	0.171322	-0.198345	0.463	0.451	1	0.999196	0.80085
Mrps15	0.0361237	-0.198067	0.199	0.22	1	0.545513	0.347446
Psma5	0.416355	-0.198011	0.502	0.47	1	1.11169	0.913675
Mid1ip1	0.151981	-0.197855	0.215	0.23	1	0.65015	0.452295
Cacybp	0.0255578	-0.197776	0.373	0.383	1	0.813922	0.616146
Arl3	0.0275037	-0.197603	0.222	0.243	1	0.514238	0.316635
Cyc1	0.497368	-0.197602	0.472	0.448	1	1.04601	0.848404
Ralb	0.0022563	-0.197561	0.514	0.525	1	1.10694	0.909374
2810025M15Rik	0.302223	-0.197166	0.527	0.456	1	1.23734	1.04017
Znf512b	0.227108	-0.197018	0.113	0.123	1	0.421294	0.224275
Rps23	2.91026e-13	-0.196904	0.928	0.878	6.6642e-09	1.34251	1.1456
A430005L14Rik	0.153641	-0.196865	0.17	0.183	1	0.609916	0.413051
Exosc3	0.0194124	-0.196818	0.139	0.163	1	0.47517	0.278352
Commd7	0.0533394	-0.196728	0.241	0.26	1	0.72048	0.523751
Tmem93	0.0125595	-0.19659	0.302	0.325	1	0.801857	0.605267
Pex11b	0.00978508	-0.196328	0.16	0.191	1	0.625141	0.428814
0610010O12Rik	0.0111032	-0.196223	0.168	0.195	1	0.500958	0.304736
Ndufb7	0.000164591	-0.196206	0.677	0.648	1	0.97378	0.777574
Rpsa	0.760191	-0.196182	0.892	0.839	1	1.83166	1.63548
Psmb3	0.00372681	-0.196142	0.612	0.595	1	1.17768	0.981541
Ube2l6	0.023286	-0.196098	0.274	0.294	1	0.934215	0.738117
Abt1	0.371408	-0.196044	0.125	0.131	1	0.499028	0.302984
Vdac2	0.111824	-0.195434	0.54	0.52	1	1.21132	1.01588
Atpif1	0.134126	-0.195423	0.524	0.481	1	0.676482	0.481059
H47	0.92785	-0.195179	0.27	0.254	1	0.538226	0.343047
Leprot	0.154358	-0.19516	0.552	0.53	1	1.35017	1.15501
Cnpy4	0.215214	-0.194999	0.199	0.21	1	0.679456	0.484457
Copz1	0.00292844	-0.194914	0.378	0.409	1	0.966511	0.771597
Fam120a	0.161111	-0.194787	0.439	0.378	1	0.900162	0.705375
1300002E11Rik	0.0627467	-0.194586	0.139	0.157	1	0.489283	0.294697
Gadd45b	0.0141322	-0.194478	0.319	0.264	1	1.06962	0.875138
Rpp21	0.00544576	-0.194466	0.239	0.267	1	0.526583	0.332117
Mrps17	0.0507913	-0.194304	0.231	0.247	1	0.636375	0.442071
Ppib	4.17958e-06	-0.194175	0.729	0.705	0.0957083	1.28645	1.09228
Pigx	0.0256527	-0.193974	0.146	0.17	1	0.466817	0.272844
Gm561	0.764166	-0.193784	0.154	0.143	1	0.489987	0.296203
Sri	0.000442896	-0.193708	0.717	0.701	1	1.4595	1.26579
Tceal1	4.63818e-05	-0.193605	0.082	0.124	1	0.467481	0.273876
Timm13	0.405975	-0.193386	0.443	0.41	1	0.782862	0.589476
2210411K11Rik	0.00499653	-0.193352	0.166	0.198	1	0.508049	0.314697
Pdlim2	0.01788	-0.19329	0.136	0.163	1	0.457664	0.264374
Cgrrf1	0.677022	-0.193284	0.227	0.211	1	0.753486	0.560201
Gpn1	0.00681516	-0.193229	0.13	0.162	1	0.570636	0.377407
Tcta	0.0385202	-0.192945	0.189	0.212	1	0.720546	0.527601
Larp7	0.497139	-0.19291	0.18	0.182	1	0.477747	0.284837
Ccnd2	0.279303	-0.192906	0.528	0.504	1	1.22485	1.03194
Mrps28	0.0198158	-0.192848	0.211	0.234	1	0.535404	0.342556
Rpl22	0.0194749	-0.19282	0.704	0.638	1	0.832578	0.639758
Tmem208	0.689916	-0.192688	0.272	0.262	1	0.684322	0.491634
l7Rn6	0.382676	-0.192598	0.215	0.217	1	0.63888	0.446281
Mycbp	0.231171	-0.19256	0.158	0.169	1	0.46893	0.27637
Ywhae	5.5524e-12	-0.192543	0.855	0.858	1.27144e-07	1.37342	1.18087
Lyar	0.114115	-0.192541	0.211	0.223	1	0.546969	0.354428
Srp14	0.0699941	-0.192417	0.6	0.555	1	1.13186	0.939439
Eny2	0.477915	-0.192288	0.282	0.271	1	0.551567	0.359279
Ppapdc1b	0.679595	-0.192271	0.198	0.181	1	0.60774	0.415468
Kbtbd3	0.741029	-0.192257	0.104	0.104	1	0.415204	0.222947
5930416I19Rik	0.022041	-0.192172	0.144	0.168	1	0.477537	0.285366
Ostc	0.256159	-0.192068	0.414	0.404	1	0.87978	0.687712
Poldip3	0.000295453	-0.192039	0.352	0.403	1	0.756992	0.564953
Zfpl1	0.160923	-0.191963	0.189	0.203	1	0.585873	0.39391
Dtd1	0.255424	-0.191923	0.183	0.192	1	0.657947	0.466024
Manf	0.106996	-0.191917	0.511	0.479	1	0.896158	0.704241
Rpl19	2.92794e-08	-0.191896	0.905	0.847	0.000670469	1.42852	1.23663
Polr2j	0.0484703	-0.191878	0.363	0.366	1	0.718662	0.526785
Vps28	0.174855	-0.191823	0.539	0.526	1	1.19738	1.00556
Pdia6	0.00906964	-0.191638	0.674	0.68	1	1.60469	1.41305
Mgst3	0.017045	-0.191571	0.271	0.295	1	0.65406	0.462489
Tax1bp3	0.00888683	-0.191494	0.535	0.528	1	1.11018	0.918686
Rpl36al	0.0186207	-0.191438	0.563	0.524	1	0.691899	0.500461
Ift20	0.00733071	-0.191332	0.313	0.335	1	0.67831	0.486978
Vps29	0.171246	-0.190899	0.497	0.475	1	1.02116	0.830261
Rab9	0.220357	-0.190646	0.213	0.222	1	0.636344	0.445697
Metap2	0.864291	-0.190591	0.541	0.489	1	0.869577	0.678987
Sh3rf1	0.220158	-0.190561	0.313	0.318	1	0.695752	0.505192
Npr3	0.000326334	-0.190366	0.133	0.181	1	0.838523	0.648157
Trim47	0.147106	-0.190181	0.505	0.489	1	1.37201	1.18183
Clns1a	0.212909	-0.190054	0.316	0.323	1	0.888861	0.698808
Tomm5	0.0100264	-0.190004	0.291	0.311	1	0.611392	0.421388
Cope	0.411009	-0.189737	0.548	0.529	1	1.22131	1.03157
2900064A13Rik	0.745585	-0.189343	0.492	0.437	1	1.04808	0.858736
Plin3	0.173381	-0.189293	0.289	0.303	1	0.778234	0.588941
Dnajb1	0.932494	-0.189063	0.522	0.512	1	1.3226	1.13353
2700029M09Rik	0.033506	-0.188874	0.194	0.215	1	0.458872	0.269997
Psmb5	0.00642973	-0.1888	0.51	0.51	1	1.03077	0.841972
Stoml2	0.0654458	-0.188786	0.255	0.276	1	0.747469	0.558683
5730437N04Rik	0.298051	-0.188754	0.282	0.281	1	0.624931	0.436178
Eif4e	0.0117717	-0.188723	0.316	0.349	1	0.815701	0.626978
Zcchc10	0.461833	-0.188689	0.11	0.115	1	0.406202	0.217513
Timm8b	0.0133974	-0.188528	0.325	0.344	1	0.641711	0.453183
Mrpl24	0.0565199	-0.188495	0.261	0.274	1	0.631216	0.442722
Immp1l	0.0319848	-0.188458	0.26	0.279	1	0.703888	0.51543
Plp2	0.440366	-0.188313	0.285	0.279	1	0.551136	0.362823
Brd9	0.0469047	-0.188234	0.375	0.388	1	0.64941	0.461176
Laptm4a	8.40972e-06	-0.188031	0.96	0.946	0.192574	2.34183	2.1538
Ube2n	7.17902e-05	-0.188007	0.468	0.493	1	0.787013	0.599006
Ppm1k	0.00305845	-0.187691	0.133	0.167	1	0.445757	0.258066
Hcfc1r1	0.288597	-0.18769	0.46	0.425	1	0.834494	0.646804
Mocs2	0.397271	-0.187681	0.276	0.274	1	0.754452	0.566771
Rasgef1a	3.0405e-11	-0.187368	0.064	0.133	6.96244e-07	0.352361	0.164993
Fam70b	0.923315	-0.187307	0.188	0.18	1	0.910136	0.722829
Trappc5	0.705579	-0.187179	0.261	0.253	1	0.708859	0.52168
Trp53i13	0.257817	-0.187117	0.162	0.17	1	0.625614	0.438497
Prelid1	0.308637	-0.187096	0.586	0.552	1	1.22675	1.03966
Fam176b	0.869959	-0.187028	0.405	0.37	1	0.976551	0.789523
Isca2	0.00678618	-0.186854	0.233	0.263	1	0.680611	0.493757
Ndufa10	0.972199	-0.186791	0.358	0.337	1	0.874013	0.687222
Echs1	0.170197	-0.186777	0.229	0.239	1	0.596044	0.409267
Psmb4	0.152543	-0.186733	0.625	0.587	1	1.15688	0.970143
Rpl31	1.46124e-06	-0.186695	0.909	0.851	0.0334609	1.12266	0.935963
Gtf2b	0.815288	-0.186483	0.25	0.234	1	0.69475	0.508266
Ypel5	0.100021	-0.186466	0.43	0.432	1	0.911144	0.724678
8430408G22Rik	0.273431	-0.186403	0.528	0.49	1	2.68433	2.49792
F11r	0.00696597	-0.186385	0.781	0.768	1	1.73774	1.55135
Atp5g2	0.000483566	-0.186317	0.604	0.575	1	0.718944	0.532626
Surf1	0.169397	-0.186061	0.204	0.215	1	0.632554	0.446492
Plekhj1	0.000551741	-0.185949	0.18	0.222	1	0.444359	0.25841
Hhex	0.124986	-0.18594	0.282	0.293	1	0.723073	0.537133
Fam50a	0.545744	-0.18589	0.199	0.198	1	0.547806	0.361916
Prdx2	0.45494	-0.185683	0.565	0.525	1	1.13676	0.951078
Eif2b4	0.206048	-0.185617	0.182	0.194	1	0.573665	0.388048
Pigyl	0.00618143	-0.1856	0.164	0.195	1	0.504334	0.318734
Tm2d1	0.026104	-0.185576	0.31	0.326	1	0.696805	0.511229
Tsen34	0.536592	-0.185575	0.435	0.411	1	1.07108	0.8855
Banp	0.258333	-0.185202	0.129	0.14	1	0.507472	0.32227
Atp6v1e1	0.307244	-0.185138	0.503	0.476	1	0.983597	0.798459
Mrpl54	0.01229	-0.18461	0.25	0.274	1	0.524982	0.340373
Ly6c2	0.428634	-0.184336	0.492	0.526	1	0.244179	0.0598429
Dnalc4	0.193781	-0.184286	0.117	0.128	1	0.519783	0.335497
Tnfsf10	0.182424	-0.184276	0.368	0.369	1	1.08307	0.898797
Zfp295	0.00293158	-0.184119	0.223	0.259	1	0.526405	0.342287
2610029G23Rik	0.0024169	-0.184004	0.174	0.21	1	0.520595	0.336591
H2-Ke2	0.0501213	-0.183949	0.245	0.256	1	0.511231	0.327282
Fcf1	0.0266036	-0.183916	0.299	0.319	1	0.675541	0.491625
Frg1	0.452463	-0.183889	0.328	0.318	1	0.603038	0.419149
Tspan6	0.162622	-0.183824	0.239	0.249	1	0.97802	0.794196
Emd	0.0213272	-0.183805	0.314	0.329	1	0.677	0.493195
Bud31	0.528708	-0.183659	0.392	0.37	1	0.842914	0.659254
Ndufa11	0.0707889	-0.183534	0.509	0.491	1	0.891873	0.708339
Nt5c	0.0357279	-0.18351	0.234	0.249	1	0.567206	0.383697
Tmem134	0.0733592	-0.183506	0.291	0.302	1	0.629862	0.446356
Eif2s2	0.198879	-0.183475	0.577	0.549	1	0.674153	0.490678
Mettl10	0.0210968	-0.183285	0.13	0.155	1	0.491215	0.30793
Hopx	1.3164e-07	-0.18319	0.058	0.108	0.00301444	0.268368	0.0851778
Stk25	0.100645	-0.182964	0.32	0.332	1	0.934521	0.751556
Exosc5	0.0430588	-0.182771	0.163	0.181	1	0.429401	0.24663
Bcl7b	0.414432	-0.182628	0.316	0.306	1	0.73229	0.549662
Sf3b5	0.0235439	-0.182625	0.33	0.34	1	0.67693	0.494305
Rab27a	0.309322	-0.182616	0.133	0.142	1	0.408172	0.225556
Thoc1	0.074764	-0.182596	0.148	0.168	1	0.518175	0.335579
Anp32a	0.105295	-0.182537	0.696	0.638	1	1.14848	0.965942
Polr1d	0.280905	-0.18248	0.498	0.469	1	0.874091	0.691612
Aimp1	0.305476	-0.182479	0.232	0.235	1	0.428916	0.246437
Adk	0.00171524	-0.182468	0.189	0.229	1	0.545611	0.363143
Rab4a	0.0197829	-0.182234	0.079	0.101	1	0.438781	0.256547
Mrpl41	0.106267	-0.18209	0.21	0.224	1	0.541956	0.359866
Tomm22	0.129806	-0.182019	0.392	0.389	1	0.828646	0.646627
Pebp1	0.0712565	-0.181981	0.5	0.493	1	0.85354	0.671559
Lsm10	0.136078	-0.181979	0.132	0.147	1	0.472514	0.290534
Brms1	0.839273	-0.181899	0.201	0.188	1	0.620781	0.438882
Luc7l3	0.0838109	-0.181872	0.372	0.374	1	0.619787	0.437915
Ywhaq	1.24452e-08	-0.181738	0.82	0.813	0.000284982	1.54222	1.36049
Fis1	0.29312	-0.181721	0.617	0.559	1	1.16398	0.98226
1810043H04Rik	0.0896732	-0.181691	0.245	0.26	1	0.58981	0.40812
Dbi	0.508291	-0.181402	0.6	0.541	1	0.816121	0.634719
Fam89b	0.551374	-0.18137	0.284	0.272	1	0.631665	0.450295
Gatc	0.701701	-0.181333	0.139	0.14	1	0.539055	0.357722
Rpl10	1.02344e-07	-0.181327	0.875	0.814	0.00234357	1.43346	1.25213
Rnh1	0.283024	-0.181184	0.442	0.458	1	1.05597	0.87479
Eif1b	0.416534	-0.18114	0.348	0.338	1	0.717292	0.536152
Ndufa9	0.133322	-0.1811	0.383	0.391	1	0.920753	0.739653
Pdcd5	0.166482	-0.181083	0.451	0.433	1	0.745249	0.564166
Mea1	0.103105	-0.18075	0.372	0.368	1	0.798783	0.618034
Chchd3	0.415379	-0.18064	0.334	0.327	1	0.774518	0.593878
Tmem5	0.145434	-0.180541	0.215	0.229	1	0.539128	0.358587
Nfu1	0.653896	-0.180392	0.278	0.264	1	0.659314	0.478922
2410006H16Rik	0.0309191	-0.180392	0.24	0.257	1	0.438345	0.257953
Sugt1	0.659825	-0.18037	0.411	0.372	1	0.895986	0.715616
Asf1a	0.376256	-0.180327	0.162	0.167	1	0.485101	0.304773
Tsta3	0.698167	-0.180271	0.14	0.139	1	0.459051	0.278779
C1qbp	0.107655	-0.180248	0.257	0.267	1	0.622393	0.442145
1810058I24Rik	0.0108181	-0.180181	0.321	0.34	1	0.648706	0.468526
Ndufs2	0.0863508	-0.180044	0.439	0.452	1	1.07733	0.897281
Prpf39	0.000799273	-0.180027	0.268	0.314	1	0.514922	0.334895
Mff	0.127115	-0.179998	0.415	0.413	1	0.995186	0.815188
Txn2	0.00966438	-0.179973	0.442	0.459	1	0.990949	0.810976
Slfn2	0.335147	-0.179789	0.202	0.21	1	0.584579	0.404791
Muted	0.0130375	-0.179721	0.09	0.115	1	0.506755	0.327034
Serbp1	0.000276126	-0.179721	0.773	0.751	1	1.22881	1.04909
Tmed10	0.118551	-0.179591	0.794	0.733	1	1.51947	1.33988
Tmem223	0.666076	-0.179524	0.326	0.309	1	0.758116	0.578591
Insig1	5.3883e-25	-0.179512	0.299	0.464	1.23387e-20	0.604522	0.425009
Dram2	0.0553498	-0.179456	0.52	0.525	1	1.24074	1.06128
Tmed1	0.100046	-0.179429	0.131	0.148	1	0.510313	0.330884
Nme2	0.000745414	-0.17929	0.726	0.691	1	1.177	0.997713
Fam58b	0.17808	-0.179075	0.1	0.111	1	0.420749	0.241674
Caml	0.405073	-0.179018	0.209	0.213	1	0.692828	0.51381
Rhoc	0.0172612	-0.178969	0.682	0.631	1	1.16735	0.988377
Mrpl55	0.0696959	-0.178744	0.192	0.211	1	0.590524	0.411779
Mosc2	0.835475	-0.178424	0.528	0.487	1	1.248	1.06958
Gja4	0.504951	-0.178176	0.227	0.207	1	1.21457	1.03639
Prrg2	0.136969	-0.178104	0.151	0.165	1	0.583053	0.404949
Ccdc71	0.18881	-0.177882	0.207	0.219	1	0.715253	0.537372
Myl6	6.13844e-10	-0.177774	0.97	0.944	1.40564e-05	2.04245	1.86467
Mrpl46	0.0252882	-0.17761	0.146	0.169	1	0.514666	0.337056
Mrps34	0.706907	-0.177605	0.187	0.181	1	0.523951	0.346346
Tmem39b	0.0755263	-0.177484	0.094	0.11	1	0.410014	0.23253
Mtif3	0.245624	-0.177469	0.151	0.163	1	0.420185	0.242716
AW209491	0.00661439	-0.177441	0.079	0.106	1	0.486817	0.309375
Isg15	0.0032245	-0.177441	0.346	0.376	1	0.858762	0.681322
Tmem205	0.443074	-0.177437	0.357	0.315	1	0.825737	0.648299
Acot9	0.881496	-0.177336	0.319	0.301	1	0.910803	0.733468
Zfp706	3.33412e-05	-0.177303	0.549	0.587	0.763481	1.03553	0.858223
Tomm20	0.0236581	-0.177219	0.435	0.434	1	0.71633	0.53911
Zfand6	0.281658	-0.177175	0.437	0.424	1	0.924689	0.747514
Cdkn1c	0.628796	-0.177116	0.387	0.359	1	1.21435	1.03723
Prkcdbp	0.150128	-0.176885	0.61	0.594	1	1.55946	1.38258
BC056474	0.698984	-0.176873	0.335	0.32	1	0.644313	0.46744
Nhp2l1	0.0476799	-0.176825	0.596	0.567	1	1.12651	0.949681
Mrpl44	0.300968	-0.176784	0.142	0.149	1	0.56787	0.391086
Tm2d2	0.484587	-0.176429	0.408	0.399	1	1.05032	0.873892
Trappc1	0.00888276	-0.176408	0.203	0.233	1	0.599343	0.422935
Fam54b	0.324926	-0.176388	0.264	0.271	1	0.76684	0.590453
Prdx3	0.0891204	-0.176157	0.236	0.255	1	0.716707	0.54055
Ier3ip1	0.143669	-0.176037	0.52	0.494	1	0.806226	0.630188
Gsdmd	0.780371	-0.175932	0.213	0.209	1	0.707097	0.531164
Raly	0.0114235	-0.17573	0.637	0.618	1	1.38005	1.20432
Arpc1a	0.541611	-0.17556	0.399	0.389	1	0.977244	0.801684
Nenf	0.685865	-0.175527	0.396	0.365	1	0.736632	0.561105
D930014E17Rik	0.226563	-0.17537	0.118	0.129	1	0.482017	0.306646
Tmem167	0.507651	-0.175288	0.317	0.286	1	0.684097	0.508809
D4Bwg0951e	0.0429093	-0.175201	0.134	0.156	1	0.538758	0.363557
Dtx3l	3.70264e-06	-0.175141	0.255	0.324	0.0847868	0.641721	0.46658
3230401D17Rik	0.0154246	-0.174904	0.302	0.323	1	0.686354	0.51145
Npc2	0.0136204	-0.174865	0.586	0.565	1	1.10619	0.931329
Mrps36	0.0118054	-0.174449	0.226	0.253	1	0.48818	0.313732
Alkbh7	0.0770419	-0.174351	0.122	0.138	1	0.442034	0.267683
Tmed4	0.138528	-0.174331	0.378	0.378	1	0.939931	0.7656
Eci1	0.22672	-0.174306	0.288	0.292	1	0.779363	0.605057
Rnf181	0.201347	-0.174292	0.337	0.342	1	0.848024	0.673731
Exosc1	0.363653	-0.174188	0.194	0.171	1	0.531704	0.357516
Lsm3	0.282068	-0.174129	0.177	0.184	1	0.422212	0.248083
Rps4y2	0.671495	-0.174062	0.369	0.329	1	1.01036	0.836294
St13	0.678455	-0.173743	0.507	0.453	1	0.75345	0.579708
Use1	0.00929857	-0.173678	0.396	0.411	1	0.772565	0.598887
Meis1	0.00217545	-0.173515	0.105	0.141	1	0.436455	0.26294
Ifitm2	0.00446778	-0.173501	0.944	0.906	1	2.09235	1.91885
Ccndbp1	0.0183975	-0.173486	0.194	0.222	1	0.626414	0.452928
Arpc5l	0.249466	-0.173469	0.286	0.285	1	0.643347	0.469878
Hprt	0.000373699	-0.173275	0.521	0.545	1	1.16358	0.990303
Glrx3	0.00259446	-0.173091	0.342	0.364	1	0.581317	0.408226
Taf9	0.0491818	-0.173043	0.349	0.358	1	0.780836	0.607794
Pak1ip1	0.562777	-0.17214	0.409	0.398	1	0.974565	0.802424
Dohh	0.176186	-0.172038	0.225	0.238	1	0.719408	0.54737
1110002B05Rik	0.00771122	-0.172034	0.486	0.498	1	1.05851	0.88648
Pold4	0.190045	-0.172008	0.166	0.174	1	0.416207	0.2442
Avpi1	0.196504	-0.172003	0.152	0.167	1	0.504764	0.332762
Mrps26	0.483034	-0.171916	0.203	0.204	1	0.559873	0.387957
Alas1	0.0354948	-0.171884	0.334	0.356	1	1.05776	0.885878
Psmg3	0.0247877	-0.171874	0.111	0.135	1	0.438747	0.266873
Ttc1	0.481491	-0.17185	0.218	0.196	1	0.568121	0.396272
Med31	0.0703099	-0.171763	0.198	0.216	1	0.585148	0.413385
Trappc2l	0.738353	-0.171618	0.248	0.24	1	0.623886	0.452268
Cuta	0.541821	-0.171373	0.44	0.406	1	0.742918	0.571544
Dazap2	0.015279	-0.171296	0.791	0.739	1	1.67552	1.50422
Ube2v1	4.06907e-06	-0.171173	0.492	0.53	0.0931777	0.832429	0.661257
Cask	0.915475	-0.171067	0.212	0.205	1	0.567881	0.396814
Gpx7	0.251106	-0.170874	0.17	0.177	1	0.606167	0.435294
Exoc8	0.592112	-0.17087	0.168	0.156	1	0.483835	0.312965
Myeov2	0.183433	-0.170731	0.543	0.504	1	0.760436	0.589705
Cryab	0.011167	-0.170725	0.128	0.157	1	0.341067	0.170343
Tcf20	0.3914	-0.170709	0.241	0.209	1	0.422146	0.251437
H2-Q8	0.00313931	-0.170636	0.182	0.221	1	0.428337	0.257702
Cno	0.312265	-0.170382	0.227	0.232	1	0.678724	0.508342
Erich1	0.524524	-0.170348	0.124	0.112	1	0.463776	0.293428
Fosl2	0.128672	-0.170341	0.418	0.355	1	0.816075	0.645734
Eapp	0.493225	-0.170306	0.339	0.305	1	0.708036	0.53773
Tbcc	0.186021	-0.170144	0.211	0.22	1	0.657402	0.487258
Nop56	0.240162	-0.169951	0.268	0.233	1	0.602921	0.43297
Spg21	0.0166861	-0.169802	0.204	0.232	1	0.578845	0.409042
Znhit2-ps	0.121902	-0.169668	0.109	0.123	1	0.427809	0.258141
Snrpd1	0.0122991	-0.169603	0.312	0.331	1	0.58409	0.414486
C920021L13Rik	9.41605e-11	-0.169501	0.203	0.312	2.15618e-06	0.457607	0.288106
Ndufv2	0.203528	-0.169251	0.503	0.486	1	1.00908	0.83983
U2af1l4	0.10946	-0.169199	0.215	0.228	1	0.583321	0.414122
Actg1	0.248428	-0.169087	0.975	0.972	1	2.96985	2.80076
Slc25a38	0.0319723	-0.169026	0.088	0.109	1	0.396217	0.227191
Rnf166	0.0611372	-0.168896	0.155	0.175	1	0.464128	0.295232
Nhp2	0.00393572	-0.168779	0.185	0.218	1	0.461071	0.292292
Zmat2	0.00626731	-0.168765	0.375	0.401	1	0.624583	0.455818
Bag5	0.171318	-0.168596	0.375	0.38	1	1.06011	0.891516
Ahsg	0.0316684	-0.168551	0.093	0.115	1	0.515356	0.346805
Rpl22l1	0.173758	-0.168315	0.494	0.458	1	0.606689	0.438374
9130011J15Rik	0.0370902	-0.168263	0.367	0.378	1	0.835223	0.66696
Procr	0.0600642	-0.168263	0.149	0.12	1	0.566563	0.3983
Cenpt	0.0549666	-0.168241	0.088	0.106	1	0.395668	0.227427
Cwc15	0.756822	-0.168221	0.495	0.45	1	0.857141	0.68892
Pir	0.464692	-0.168212	0.167	0.17	1	0.674782	0.50657
0610011F06Rik	0.0492151	-0.16818	0.097	0.117	1	0.353019	0.184839
Dctpp1	9.28048e-05	-0.167991	0.088	0.129	1	0.320705	0.152715
Sept4	0.454595	-0.16788	0.465	0.45	1	1.36617	1.19829
Tagap1	0.00183218	-0.167561	0.085	0.117	1	0.341014	0.173453
Fdps	0.110865	-0.167483	0.174	0.191	1	0.543354	0.375871
Tpd52l2	0.605604	-0.167477	0.398	0.38	1	0.917107	0.74963
Litaf	0.0391225	-0.167471	0.558	0.497	1	1.53863	1.37115
2410015M20Rik	0.229069	-0.16745	0.406	0.389	1	0.638935	0.471485
Ifit3	0.357064	-0.167371	0.222	0.232	1	1.01405	0.846683
Rrp1	0.66436	-0.167345	0.532	0.483	1	1.11144	0.944099
Leprel4	0.183212	-0.16725	0.115	0.128	1	0.403947	0.236697
Mpzl1	0.0189908	-0.167129	0.477	0.496	1	1.46763	1.3005
Nufip2	0.8716	-0.167127	0.591	0.557	1	1.13672	0.969589
Stk16	0.577391	-0.167118	0.194	0.194	1	0.626117	0.458999
Bax	0.0726599	-0.166982	0.441	0.432	1	0.881696	0.714714
Hmgn3	0.460315	-0.166962	0.13	0.135	1	0.335685	0.168723
Fkbp2	0.00188898	-0.166831	0.284	0.309	1	0.583093	0.416262
Pdcd6	0.24971	-0.166794	0.43	0.42	1	1.02242	0.855625
Erp29	0.884414	-0.16667	0.397	0.372	1	0.884117	0.717447
Anapc10	0.911217	-0.166651	0.157	0.152	1	0.523342	0.35669
Fubp3	0.000424401	-0.166467	0.27	0.315	1	0.559377	0.39291
Gipc1	0.850026	-0.166439	0.242	0.224	1	0.64319	0.476751
Rbm8a	0.00505534	-0.166334	0.517	0.517	1	0.919742	0.753408
Atp5d	0.316166	-0.166262	0.691	0.652	1	1.24099	1.07473
2210013O21Rik	0.973886	-0.166256	0.369	0.343	1	0.89082	0.724564
Slc12a6	0.0154269	-0.166004	0.243	0.198	1	0.5197	0.353696
Tmem9b	0.15777	-0.165815	0.461	0.453	1	1.13514	0.969327
Coro1b	0.64817	-0.165738	0.521	0.494	1	1.30714	1.1414
0610012G03Rik	0.488466	-0.165711	0.371	0.351	1	0.7701	0.604389
Nit2	0.54082	-0.165519	0.107	0.11	1	0.395818	0.2303
Atp6v1d	0.764446	-0.165317	0.362	0.33	1	0.754167	0.58885
Maoa	0.0400143	-0.165086	0.255	0.281	1	0.986086	0.821
Polr2c	0.805432	-0.165075	0.387	0.365	1	0.979799	0.814724
Ripk3	0.727846	-0.165064	0.123	0.124	1	0.48476	0.319696
Pkig	0.469606	-0.165014	0.412	0.389	1	0.813936	0.648923
Btf3	0.00374028	-0.164927	0.739	0.677	1	1.1192	0.954274
Ttc32	0.679261	-0.164877	0.126	0.116	1	0.455515	0.290638
Chst12	0.198816	-0.164844	0.126	0.138	1	0.428322	0.263478
Nap1l4	0.19861	-0.164783	0.457	0.448	1	0.973274	0.80849
Ywhah	0.15607	-0.164752	0.713	0.679	1	1.43823	1.27348
Ptn	0.0687497	-0.164568	0.228	0.246	1	0.89888	0.734312
1810013L24Rik	0.410817	-0.1645	0.301	0.302	1	0.68461	0.52011
Trappc6b	0.115138	-0.164417	0.398	0.403	1	0.952291	0.787874
Mob2	0.421941	-0.16438	0.378	0.334	1	0.965207	0.800828
Nsa2	0.601586	-0.164208	0.335	0.33	1	0.470401	0.306194
Tmem160	0.491791	-0.164133	0.474	0.441	1	0.725244	0.561111
Psmg1	0.236311	-0.163989	0.121	0.13	1	0.441826	0.277837
Sdhc	0.180444	-0.163924	0.502	0.467	1	0.785322	0.621398
BC003266	0.972839	-0.163817	0.241	0.228	1	0.722856	0.559038
Tprkb	0.199945	-0.163803	0.103	0.115	1	0.417698	0.253895
Fam176a	0.550118	-0.163695	0.117	0.121	1	0.621672	0.457977
Cox7b	0.704817	-0.16364	0.539	0.476	1	0.687169	0.523529
Med11	0.0886907	-0.163554	0.153	0.17	1	0.450279	0.286725
Nop58	0.576037	-0.163506	0.325	0.323	1	0.588943	0.425438
4732418C07Rik	0.0565715	-0.163391	0.44	0.379	1	0.919792	0.756401
H1f0	0.205736	-0.163295	0.587	0.574	1	1.35067	1.18738
Txndc12	0.2514	-0.163209	0.325	0.323	1	0.767219	0.60401
Atxn7l3b	0.163979	-0.163144	0.574	0.557	1	1.12024	0.957094
Srsf7	0.49519	-0.163055	0.424	0.411	1	0.880272	0.717217
Pex19	3.67892e-05	-0.162993	0.249	0.315	0.842436	0.695507	0.532514
Lmo4	0.810419	-0.162847	0.329	0.302	1	0.410177	0.24733
Jmjd6	0.630205	-0.162833	0.304	0.277	1	0.813946	0.651112
Mat2b	0.19361	-0.162722	0.434	0.427	1	1.01495	0.852228
Pole4	0.553714	-0.162581	0.258	0.254	1	0.594083	0.431502
Arpc1b	0.184354	-0.162526	0.779	0.754	1	1.61183	1.4493
Nme1	0.0764732	-0.162506	0.386	0.386	1	0.746383	0.583877
As3mt	0.192738	-0.162471	0.175	0.188	1	0.656699	0.494228
Yipf1	0.928165	-0.162387	0.25	0.24	1	0.666012	0.503625
1110008F13Rik	0.148651	-0.162152	0.313	0.316	1	0.649756	0.487603
Rab4b	0.715015	-0.162071	0.284	0.258	1	0.581754	0.419683
Vegfc	0.21135	-0.162036	0.122	0.135	1	0.712042	0.550006
Sdf2	0.332987	-0.161982	0.412	0.368	1	0.952229	0.790248
Yars2	0.0319092	-0.16186	0.087	0.108	1	0.364906	0.203045
Cbr1	0.303739	-0.161774	0.203	0.21	1	0.571322	0.409548
Gm2382	0.00783936	-0.161694	0.142	0.174	1	0.402013	0.240318
Zmynd8	0.838272	-0.161683	0.353	0.332	1	0.621858	0.460175
Znhit1	0.921196	-0.161576	0.31	0.286	1	0.464106	0.302531
H13	0.333361	-0.161567	0.475	0.459	1	1.02788	0.866312
Mrpl22	0.00736162	-0.161406	0.148	0.18	1	0.487803	0.326397
Bcas2	0.353737	-0.161311	0.332	0.326	1	0.678581	0.517271
Rpl5	0.352268	-0.161226	0.892	0.788	1	1.08473	0.923503
Rps3	8.65268e-09	-0.161215	0.93	0.904	0.000198138	1.87983	1.71861
Zc3hc1	0.703074	-0.161026	0.132	0.122	1	0.511083	0.350056
Pea15a	0.00811215	-0.160989	0.73	0.721	1	1.51767	1.35669
Snw1	0.6641	-0.160873	0.446	0.42	1	0.87481	0.713938
Hint2	0.837531	-0.160855	0.285	0.267	1	0.581176	0.420322
Nppa	9.90559e-06	-0.160667	0.064	0.108	0.226828	0.409949	0.249281
0910001L09Rik	0.275876	-0.160516	0.265	0.26	1	0.395715	0.235199
Mrpl14	0.424796	-0.160484	0.292	0.286	1	0.57772	0.417236
Gstp1	2.32143e-05	-0.160174	0.662	0.667	0.531584	1.2228	1.06263
Dedd	1.65839e-06	-0.159924	0.25	0.327	0.0379755	0.571656	0.411732
Atf3	0.70661	-0.159874	0.541	0.526	1	2.0931	1.93323
Pqbp1	0.783532	-0.159833	0.358	0.323	1	0.742899	0.583066
Fam136a	0.00748431	-0.159827	0.115	0.146	1	0.464619	0.304792
1700029F09Rik	0.629036	-0.159796	0.118	0.119	1	0.402012	0.242216
BC002163	0.00751283	-0.159577	0.375	0.404	1	0.385849	0.226273
Hsd17b10	0.878344	-0.159463	0.256	0.243	1	0.5757	0.416236
Wbscr22	0.388012	-0.159406	0.164	0.169	1	0.549712	0.390306
Cox5a	0.00321694	-0.1594	0.644	0.628	1	1.01285	0.853453
Mlf2	0.619034	-0.158999	0.593	0.538	1	1.10873	0.94973
Supt4h1	0.382672	-0.158993	0.387	0.371	1	0.743833	0.584841
Abi3	0.848756	-0.158945	0.351	0.338	1	0.647774	0.488829
Hadh	0.180665	-0.158887	0.328	0.335	1	0.771139	0.612252
Mir682	5.03921e-09	-0.158729	0.721	0.78	0.000115393	0.536892	0.378163
Cxx1c	0.19705	-0.158624	0.314	0.273	1	0.710382	0.551758
Tgfb1i1	0.887797	-0.158561	0.369	0.348	1	0.942222	0.783661
Pmm2	0.334063	-0.158481	0.204	0.18	1	0.625069	0.466587
1110001J03Rik	0.0247004	-0.158307	0.223	0.249	1	0.433948	0.275641
Qdpr	0.235038	-0.158307	0.42	0.425	1	0.911335	0.753029
Rhoj	0.165803	-0.158262	0.629	0.607	1	1.37623	1.21797
Klk8	0.268196	-0.1581	0.121	0.13	1	0.497949	0.339849
Chrnb1	0.91572	-0.158061	0.126	0.12	1	0.558679	0.400618
Taz	0.749404	-0.15805	0.195	0.191	1	0.608512	0.450462
Ergic3	0.331982	-0.157876	0.456	0.419	1	1.01787	0.859996
Prorsd1	0.412448	-0.157637	0.1	0.107	1	0.29363	0.135993
BC005624	0.374891	-0.15742	0.3	0.294	1	0.669497	0.512076
Ccs	0.75506	-0.157374	0.208	0.194	1	0.652276	0.494902
2900092E17Rik	0.34637	-0.157368	0.214	0.218	1	0.570877	0.41351
Hspb1	0.297789	-0.157322	0.817	0.815	1	2.22544	2.06812
Psmd7	0.110876	-0.157052	0.511	0.5	1	1.06264	0.905589
Srsf9	0.0213489	-0.156774	0.434	0.448	1	0.808735	0.651961
Per3	0.0730031	-0.156751	0.18	0.146	1	0.508027	0.351276
1110004E09Rik	0.389998	-0.156738	0.136	0.142	1	0.408706	0.251967
Rab24	0.364779	-0.156731	0.188	0.195	1	0.547244	0.390512
Cyth2	0.432952	-0.156527	0.322	0.286	1	0.811321	0.654794
Degs2	0.648599	-0.156421	0.252	0.233	1	0.989152	0.832732
Atp6v0b	0.430647	-0.156408	0.595	0.57	1	1.19163	1.03522
Pycrl	0.351077	-0.156191	0.103	0.111	1	0.437908	0.281717
Tceal8	0.24283	-0.156072	0.291	0.293	1	0.682017	0.525945
Mageh1	0.125512	-0.15601	0.179	0.194	1	0.56969	0.413681
Timm9	0.0455967	-0.155916	0.106	0.127	1	0.374502	0.218585
Exosc7	0.0394825	-0.1558	0.168	0.193	1	0.552994	0.397194
Usp18	0.420681	-0.155523	0.238	0.245	1	0.901907	0.746384
Bik	0.860209	-0.155478	0.123	0.121	1	0.431412	0.275934
Bnip1	0.597206	-0.15546	0.109	0.112	1	0.390412	0.234952
Mtx2	0.103924	-0.155179	0.192	0.209	1	0.567116	0.411937
Rsrc2	0.0557806	-0.155149	0.596	0.503	1	0.881544	0.726396
Eef1g	0.0279432	-0.155114	0.657	0.618	1	1.13573	0.98062
Mad2l1bp	0.725242	-0.1551	0.127	0.127	1	0.531742	0.376642
Gfod2	0.619366	-0.155	0.099	0.103	1	0.542561	0.387561
Pigp	0.043893	-0.154986	0.311	0.33	1	0.651809	0.496824
Nip7	0.133553	-0.154805	0.154	0.173	1	0.524592	0.369787
Jagn1	0.300108	-0.154794	0.186	0.194	1	0.585887	0.431092
Xaf1	0.227581	-0.154661	0.492	0.42	1	1.09914	0.944476
Lias	0.671592	-0.154207	0.185	0.174	1	0.539319	0.385112
Tpst1	0.948327	-0.154092	0.275	0.27	1	0.926119	0.772027
Dctn6	0.50643	-0.153863	0.375	0.36	1	0.919915	0.766052
Lims2	0.220156	-0.15385	0.681	0.639	1	2.002	1.84815
Ptplb	0.211787	-0.15382	0.194	0.206	1	0.514828	0.361008
Pold2	0.0799427	-0.153754	0.122	0.14	1	0.413921	0.260166
Synj2bp	0.372412	-0.153715	0.379	0.37	1	0.919933	0.766219
Ube2f	0.724293	-0.153713	0.215	0.212	1	0.55294	0.399227
Pla2g7	9.65325e-06	-0.153486	0.059	0.101	0.22105	0.30495	0.151464
Gnb2l1	0.415744	-0.153459	0.823	0.747	1	1.47052	1.31706
2610019F03Rik	0.94902	-0.153452	0.248	0.24	1	1.18353	1.03008
Atp6v1f	0.00712427	-0.153341	0.597	0.582	1	1.05368	0.900343
Mif4gd	0.146067	-0.152936	0.234	0.249	1	0.669741	0.516806
1110001A16Rik	0.0238177	-0.152816	0.148	0.173	1	0.407298	0.254482
Anapc16	0.228193	-0.152804	0.335	0.294	1	0.760087	0.607283
8430410A17Rik	0.966038	-0.152786	0.136	0.131	1	0.468895	0.316109
Tapbpl	0.29485	-0.152736	0.275	0.28	1	0.900919	0.748183
Tmem222	0.566053	-0.152729	0.202	0.186	1	0.614783	0.462054
Ngfrap1	0.29821	-0.152707	0.222	0.224	1	0.53546	0.382753
Eef1e1	0.00443419	-0.152511	0.093	0.122	1	0.355386	0.202874
Rheb	0.0433705	-0.152451	0.594	0.562	1	1.08542	0.932973
Mt1	0.787946	-0.152242	0.516	0.536	1	1.17604	1.0238
Bag1	0.232453	-0.152172	0.492	0.478	1	0.991272	0.8391
Mrpl15	0.859092	-0.152153	0.226	0.217	1	0.545247	0.393094
1810063B05Rik	0.544475	-0.152038	0.177	0.16	1	0.475004	0.322966
Agrn	1.58921e-05	-0.152034	0.321	0.231	0.363912	0.795447	0.643413
2700094K13Rik	0.979632	-0.152015	0.166	0.159	1	0.434218	0.282203
N6amt2	0.25692	-0.152004	0.095	0.105	1	0.35749	0.205486
Rabgef1	0.212092	-0.151959	0.219	0.228	1	0.536655	0.384695
Tpst2	0.834132	-0.151946	0.508	0.474	1	1.33971	1.18776
AI413582	0.915742	-0.15188	0.182	0.172	1	0.459355	0.307475
Mrpl40	0.426343	-0.151655	0.178	0.181	1	0.509612	0.357957
BC029722	0.0580838	-0.151606	0.167	0.186	1	0.456162	0.304555
2210016F16Rik	0.241001	-0.151558	0.143	0.156	1	0.430348	0.27879
Cdkn2b	0.0325029	-0.151387	0.091	0.114	1	0.678126	0.526739
Laptm4b	0.154008	-0.151345	0.271	0.282	1	0.767461	0.616115
Hagh	0.74493	-0.15118	0.24	0.226	1	0.679816	0.528636
Rps2	5.03678e-05	-0.15109	0.864	0.825	1	1.44012	1.28903
Gtf2e2	0.403388	-0.151088	0.206	0.207	1	0.610527	0.459439
Rnf114	0.371197	-0.150932	0.4	0.388	1	0.97003	0.819097
Zfyve21	0.604002	-0.150925	0.159	0.161	1	0.557538	0.406613
Rdbp	0.0129643	-0.150896	0.137	0.166	1	0.480988	0.330092
Cox19	0.326121	-0.150754	0.147	0.156	1	0.478714	0.32796
Tmem147	0.145842	-0.150711	0.358	0.363	1	0.835984	0.685273
BC029214	0.222369	-0.150683	0.113	0.123	1	0.420004	0.269321
Hspa8	0.349116	-0.150635	0.975	0.983	1	2.79845	2.64781
Rps13	0.000859791	-0.150603	0.855	0.781	1	1.13729	0.986682
Etfa	0.326712	-0.15058	0.357	0.35	1	0.753567	0.602987
Vamp4	0.0382949	-0.150542	0.241	0.272	1	0.581304	0.430762
Ifi27l1	0.432012	-0.150501	0.647	0.601	1	1.27523	1.12473
Tap1	0.0898845	-0.150462	0.29	0.311	1	0.856335	0.705873
Zmat5	0.330716	-0.150458	0.202	0.205	1	0.476508	0.32605
Polr3gl	0.27664	-0.150331	0.233	0.237	1	0.483984	0.333652
Ing4	0.913265	-0.150303	0.153	0.146	1	0.51049	0.360188
Exosc4	0.954097	-0.150252	0.197	0.191	1	0.610044	0.459792
Spsb3	0.677685	-0.150229	0.189	0.189	1	0.632553	0.482324
Tex264	0.876889	-0.14989	0.318	0.303	1	0.809214	0.659324
Gimap9	0.694594	-0.149875	0.204	0.188	1	0.58497	0.435095
H2-M3	0.905012	-0.149813	0.208	0.198	1	0.71638	0.566567
Sdhaf1	0.575758	-0.149678	0.136	0.137	1	0.469715	0.320037
Osgep	0.870772	-0.149661	0.28	0.268	1	0.748475	0.598814
Brcc3	0.462297	-0.149624	0.192	0.194	1	0.561248	0.411623
Lgr4	4.24379e-05	-0.149469	0.075	0.116	0.971785	0.24151	0.0920416
Ythdf2	1.31242e-09	-0.149465	0.376	0.495	3.00532e-05	0.821516	0.672051
Tmem98	0.700519	-0.149391	0.282	0.271	1	0.84393	0.694539
Gfer	0.0114276	-0.149324	0.09	0.116	1	0.331188	0.181864
Uck1	0.0328406	-0.149208	0.121	0.146	1	0.488777	0.339569
Psmd8	0.540336	-0.148964	0.482	0.452	1	0.978531	0.829567
D10Jhu81e	0.112715	-0.148943	0.182	0.198	1	0.521317	0.372374
Fkbp8	0.446168	-0.148552	0.533	0.478	1	0.996883	0.848331
Med21	0.953303	-0.148544	0.27	0.26	1	0.719174	0.57063
Nop14	0.653099	-0.148383	0.156	0.144	1	0.399507	0.251123
Lamtor3	0.855022	-0.148378	0.308	0.295	1	0.792761	0.644384
Nucks1	0.00601332	-0.148308	0.504	0.412	1	0.6388	0.490492
Stap2	0.305511	-0.148231	0.247	0.219	1	0.838906	0.690675
2310061C15Rik	0.179196	-0.148211	0.103	0.115	1	0.383083	0.234872
D11Wsu99e	0.100029	-0.148192	0.328	0.333	1	0.541869	0.393677
Sec11c	0.00436474	-0.148107	0.268	0.304	1	0.534879	0.386773
Mrto4	0.397503	-0.148048	0.118	0.124	1	0.366767	0.218719
Cish	0.659636	-0.147788	0.223	0.226	1	0.807354	0.659567
Rrp9	0.102896	-0.147603	0.103	0.121	1	0.413723	0.26612
Eif5b	0.893753	-0.147579	0.499	0.45	1	0.733772	0.586193
Ptprr	0.750296	-0.147485	0.216	0.201	1	1.11496	0.967478
Rnasek	0.504965	-0.147396	0.677	0.579	1	1.04376	0.896362
Emp3	0.00118352	-0.147291	0.203	0.247	1	0.461552	0.31426
Tmem80	0.626774	-0.147231	0.114	0.117	1	0.466053	0.318821
Mt2	0.59779	-0.146901	0.344	0.351	1	0.618774	0.471873
Med8	0.869473	-0.146891	0.204	0.199	1	0.569207	0.422316
Ociad1	0.342464	-0.146834	0.6	0.565	1	1.21275	1.06591
Tet2	0.000325427	-0.146755	0.225	0.281	1	0.460282	0.313527
Wbp2	0.0126458	-0.146747	0.449	0.476	1	0.842566	0.695819
Wdr74	0.0995455	-0.146471	0.119	0.138	1	0.459071	0.312599
Cdkn1a	0.0672509	-0.146288	0.817	0.842	1	2.58283	2.43654
Siglech	0.00838981	-0.146135	0.084	0.113	1	0.163309	0.0171741
Prmt2	0.259896	-0.14601	0.146	0.156	1	0.62055	0.47454
Rogdi	0.00125138	-0.145995	0.119	0.159	1	0.393793	0.247798
Timm50	0.762948	-0.145982	0.216	0.212	1	0.61968	0.473697
B4galt3	0.966872	-0.145935	0.169	0.161	1	0.537237	0.391302
Tmcc1	0.0659409	-0.14592	0.138	0.113	1	0.353377	0.207457
Gsta4	0.0086728	-0.145811	0.216	0.253	1	0.649348	0.503537
Vapa	1.48907e-06	-0.145594	0.643	0.694	0.0340983	1.07907	0.933473
I830012O16Rik	0.8595	-0.145594	0.153	0.152	1	0.688616	0.543023
Cspp1	0.204817	-0.145563	0.139	0.12	1	0.367668	0.222105
Naa20	0.52882	-0.145561	0.397	0.381	1	0.82439	0.678829
Tssc4	0.0322716	-0.145445	0.263	0.214	1	0.680943	0.535498
Sys1	0.484767	-0.145401	0.324	0.321	1	0.768889	0.623488
Ipo11	0.0358577	-0.145255	0.235	0.189	1	0.755502	0.610247
Polr2l	0.708541	-0.145246	0.467	0.433	1	0.550921	0.405674
Suclg1	0.2963	-0.14504	0.312	0.309	1	0.756948	0.611908
Mrps12	0.460223	-0.145034	0.239	0.236	1	0.530768	0.385734
Zfp710	0.604392	-0.144817	0.162	0.163	1	0.342338	0.19752
Hspe1	0.0351677	-0.1448	0.393	0.399	1	0.570815	0.426015
Myd88	0.362454	-0.144641	0.221	0.228	1	0.701071	0.55643
Btg2	0.172988	-0.144609	0.863	0.861	1	2.5745	2.42989
Bola3	0.692797	-0.144608	0.273	0.266	1	0.542235	0.397627
Fam133b	0.242109	-0.144536	0.189	0.198	1	0.411684	0.267149
Limd2	0.767599	-0.144483	0.29	0.283	1	0.322339	0.177857
Rce1	0.899341	-0.144478	0.191	0.184	1	0.601567	0.457088
Commd8	0.0952831	-0.144463	0.256	0.274	1	0.581625	0.437161
Fam125a	0.734973	-0.144408	0.26	0.255	1	0.679253	0.534845
Ddx47	0.868615	-0.144288	0.278	0.27	1	0.712013	0.567725
1810009A15Rik	0.44862	-0.144286	0.243	0.241	1	0.528763	0.384477
Mll2	1.86295e-07	-0.144195	0.694	0.712	0.00426597	0.84736	0.703165
Dctn3	0.957049	-0.144139	0.468	0.424	1	0.880216	0.736077
Hax1	0.496688	-0.144069	0.258	0.254	1	0.628827	0.484759
Nudc	0.939668	-0.144039	0.499	0.441	1	0.906289	0.76225
2400001E08Rik	0.610617	-0.143816	0.403	0.381	1	0.805392	0.661576
Sirt6	3.52535e-07	-0.143691	0.119	0.182	0.00807269	0.293564	0.149873
Cd200	0.00195077	-0.143634	0.739	0.784	1	2.04376	1.90012
Ube2v2	0.0630718	-0.143505	0.214	0.233	1	0.464961	0.321456
1700019E19Rik	0.335117	-0.14342	0.177	0.156	1	0.469556	0.326136
Cdk4	0.0330916	-0.143359	0.408	0.431	1	0.961254	0.817896
Cisd1	0.944371	-0.14293	0.248	0.236	1	0.576837	0.433908
Thoc6	0.951141	-0.142517	0.113	0.11	1	0.382888	0.240371
Ssr4	0.887193	-0.142486	0.479	0.436	1	0.814074	0.671588
Akr7a5	0.373001	-0.14239	0.162	0.17	1	0.518524	0.376134
Zfp444	0.879741	-0.142314	0.133	0.127	1	0.437468	0.295154
Birc6	5.9488e-07	-0.142298	0.615	0.674	0.0136222	0.831333	0.689035
Cmtm3	0.283979	-0.142291	0.341	0.302	1	0.827568	0.685278
Zwint	0.225967	-0.142266	0.211	0.221	1	0.559088	0.416823
Gpx4	0.000525126	-0.142145	0.803	0.766	1	1.39584	1.25369
Ncald	0.0206048	-0.142139	0.079	0.102	1	0.378748	0.236608
Sertad1	0.419155	-0.142103	0.519	0.487	1	1.55941	1.4173
Dnajc4	0.491168	-0.142058	0.121	0.11	1	0.405563	0.263505
Mrpl12	0.637136	-0.142038	0.299	0.272	1	0.64281	0.500772
Ssu72	0.766063	-0.141831	0.548	0.507	1	1.11055	0.96872
Dgcr6	0.10906	-0.141692	0.188	0.204	1	0.513405	0.371713
Acat1	0.620708	-0.141557	0.331	0.327	1	0.761142	0.619585
Lpar6	0.325527	-0.141518	0.39	0.363	1	1.0889	0.947381
Myg1	0.773879	-0.141386	0.144	0.144	1	0.483838	0.342451
Rbp1	0.0424509	-0.141377	0.192	0.217	1	0.536802	0.395425
Mcee	0.51765	-0.141316	0.259	0.234	1	0.547879	0.406563
Gngt2	0.709972	-0.141266	0.539	0.482	1	0.942183	0.800917
Arid5a	0.583334	-0.141132	0.25	0.235	1	0.781007	0.639875
Rala	0.222465	-0.140914	0.436	0.424	1	0.841397	0.700483
Gimap6	0.678158	-0.140747	0.828	0.771	1	2.04117	1.90042
Mrpl13	0.404478	-0.140745	0.255	0.229	1	0.606919	0.466175
Cmc1	0.784166	-0.140728	0.141	0.132	1	0.349621	0.208893
Dcaf6	1.65561e-13	-0.140623	0.169	0.277	3.79118e-09	0.334785	0.194163
Med30	0.52973	-0.140595	0.165	0.166	1	0.436507	0.295912
Ostf1	0.0733014	-0.140491	0.686	0.66	1	1.41524	1.27475
Cops7a	0.579761	-0.140381	0.366	0.354	1	0.899914	0.759533
Ethe1	0.643073	-0.140338	0.174	0.177	1	0.475164	0.334826
3110003A17Rik	0.224031	-0.140263	0.26	0.261	1	0.46311	0.322848
Lrig2	0.524111	-0.140236	0.135	0.139	1	0.384982	0.244746
Ndufc2	0.364656	-0.140167	0.657	0.587	1	0.97601	0.835844
Dusp12	0.440953	-0.140132	0.115	0.122	1	0.436108	0.295977
Srp9	0.0392638	-0.140083	0.429	0.427	1	0.778014	0.637931
Mcfd2	0.265857	-0.140032	0.389	0.392	1	1.03588	0.895851
6820431F20Rik	0.000105831	-0.140025	0.245	0.181	1	0.32938	0.189356
Orc6	0.042453	-0.140013	0.134	0.154	1	0.518979	0.378966
Snrnp48	0.88378	-0.139945	0.136	0.134	1	0.376212	0.236267
Cops6	0.666764	-0.139869	0.424	0.392	1	0.874623	0.734754
Sap30bp	0.22637	-0.139785	0.15	0.163	1	0.501199	0.361414
Cnpy3	0.424642	-0.139388	0.215	0.22	1	0.562688	0.4233
Fam69a	0.0200485	-0.13936	0.134	0.162	1	0.507138	0.367778
Snx15	0.698901	-0.139347	0.125	0.125	1	0.412636	0.273289
Mrps5	0.10872	-0.139341	0.228	0.191	1	0.523973	0.384632
Tpm3	0.0181324	-0.139309	0.896	0.857	1	1.74671	1.6074
Siva1	0.154023	-0.139287	0.14	0.154	1	0.413244	0.273957
1810026B05Rik	0.436125	-0.139186	0.332	0.302	1	0.555765	0.416579
Ccdc101	0.689605	-0.139066	0.228	0.224	1	0.598813	0.459748
Mlx	0.806265	-0.139043	0.172	0.17	1	0.5471	0.408057
Nob1	0.180549	-0.139007	0.115	0.128	1	0.403127	0.26412
Abhd11	0.805491	-0.138955	0.109	0.108	1	0.344502	0.205547
Hoxa5	0.638298	-0.138933	0.126	0.128	1	0.40312	0.264188
2310036O22Rik	0.461642	-0.138765	0.551	0.476	1	0.822749	0.683984
Pde6d	0.345944	-0.138735	0.243	0.213	1	0.648634	0.509899
Cnpy2	0.861665	-0.138699	0.359	0.33	1	0.755194	0.616495
Tmem41a	0.673372	-0.138692	0.104	0.106	1	0.443232	0.30454
Ubxn1	0.711065	-0.138496	0.522	0.465	1	0.95298	0.814484
Atpaf2	0.0330161	-0.13845	0.086	0.108	1	0.40515	0.2667
Xbp1	0.281682	-0.138388	0.581	0.567	1	1.29335	1.15496
Trappc6a	0.13276	-0.138289	0.167	0.181	1	0.430205	0.291916
BC004004	0.943056	-0.138236	0.317	0.3	1	0.71895	0.580714
Arid4a	0.444611	-0.138236	0.369	0.332	1	0.70505	0.566815
Acbd6	0.764815	-0.138153	0.24	0.232	1	0.55005	0.411897
Mrpl48	0.877972	-0.138012	0.256	0.248	1	0.575433	0.437421
Hist3h2a	0.298147	-0.137975	0.196	0.205	1	0.57253	0.434555
Eef1d	0.630397	-0.137886	0.518	0.48	1	0.912756	0.77487
Sep15	0.0691787	-0.137827	0.822	0.795	1	1.85818	1.72035
Hdgf	0.000820209	-0.137771	0.416	0.458	1	0.797702	0.659931
Mrpl21	0.370553	-0.137734	0.2	0.176	1	0.450288	0.312554
Sh3glb2	0.27254	-0.137729	0.296	0.26	1	0.719643	0.581914
Derl2	0.354185	-0.137575	0.236	0.211	1	0.55564	0.418065
Ing1	0.517958	-0.137541	0.257	0.233	1	0.569587	0.432047
Pcbp3	0.0240364	-0.137501	0.078	0.101	1	0.345106	0.207604
Hpcal1	0.208538	-0.137332	0.507	0.446	1	1.35473	1.2174
Hes6	0.0100089	-0.137294	0.107	0.135	1	0.386768	0.249474
Pdf	0.73498	-0.137177	0.254	0.236	1	0.725425	0.588248
Dnpep	0.212658	-0.137043	0.305	0.274	1	0.894712	0.757669
Ndufs3	0.220457	-0.136906	0.346	0.348	1	0.687542	0.550635
Churc1	0.728584	-0.136839	0.29	0.278	1	0.667489	0.53065
Hmgb2	0.70859	-0.136763	0.409	0.365	1	0.55131	0.414546
Brd1	0.405027	-0.136668	0.257	0.228	1	0.494738	0.35807
Rrp7a	0.0322423	-0.136653	0.209	0.239	1	0.643183	0.50653
Bin1	0.486053	-0.136605	0.186	0.191	1	0.34513	0.208524
Car3	0.910212	-0.136596	0.098	0.101	1	0.70921	0.572614
Armc1	0.865572	-0.136514	0.265	0.258	1	0.738348	0.601834
1810020D17Rik	0.248808	-0.136507	0.199	0.208	1	0.542671	0.406164
Cstb	0.897328	-0.136423	0.494	0.448	1	0.733853	0.59743
Ttc35	0.882083	-0.13635	0.314	0.3	1	0.767897	0.631547
Rp9	0.762688	-0.13606	0.323	0.296	1	0.545281	0.409221
Pon2	0.0603585	-0.13597	0.458	0.469	1	1.18045	1.04449
Rps19bp1	0.0546653	-0.135654	0.126	0.147	1	0.372112	0.236458
Kank1	0.551732	-0.135612	0.15	0.138	1	0.424452	0.28884
Fkbp7	0.416506	-0.135427	0.27	0.242	1	0.664392	0.528965
Ap1s1	0.321519	-0.135392	0.231	0.236	1	0.587614	0.452221
Dnajb2	0.342876	-0.135365	0.179	0.186	1	0.422556	0.287191
Dnajc18	0.99066	-0.135357	0.183	0.179	1	0.554502	0.419145
2810422J05Rik	0.362613	-0.135351	0.199	0.206	1	0.589237	0.453887
Cd82	0.00628559	-0.135259	0.19	0.23	1	0.434172	0.298912
Anp32b	0.411467	-0.135134	0.538	0.5	1	0.785171	0.650037
Ggh	0.342766	-0.135119	0.3	0.263	1	0.719615	0.584495
2510002D24Rik	0.256988	-0.135083	0.181	0.193	1	0.583359	0.448276
Dtymk	0.168846	-0.135066	0.151	0.165	1	0.389599	0.254533
Fam86	0.813943	-0.135056	0.137	0.136	1	0.426451	0.291394
Atp5g3	0.421234	-0.134688	0.633	0.609	1	0.759948	0.62526
Dnttip1	0.0298406	-0.134684	0.24	0.192	1	0.540679	0.405995
Lsm1	0.592368	-0.134563	0.167	0.168	1	0.470283	0.335719
Gng10	0.0373012	-0.134322	0.17	0.195	1	0.365001	0.230679
Mospd1	0.0744593	-0.13424	0.187	0.207	1	0.768587	0.634346
Ado	0.000790418	-0.134235	0.205	0.255	1	0.563189	0.428954
Mcts1	0.664628	-0.134186	0.218	0.205	1	0.497765	0.363579
Ninj1	0.00799098	-0.134141	0.328	0.362	1	0.898237	0.764096
Zdhhc1	0.236498	-0.134066	0.183	0.158	1	0.579143	0.445077
Zfp593	0.0668279	-0.134046	0.09	0.108	1	0.325558	0.191512
Bcl2l12	0.337089	-0.134015	0.097	0.105	1	0.300492	0.166477
Stub1	0.43332	-0.133863	0.407	0.388	1	0.866576	0.732713
Bzw2	0.315773	-0.133805	0.127	0.137	1	0.36979	0.235985
Rrp15	0.760657	-0.133767	0.119	0.119	1	0.361419	0.227652
1110050K14Rik	0.00054753	-0.133693	0.101	0.14	1	0.483413	0.349719
Skap2	0.272612	-0.133628	0.278	0.247	1	0.638783	0.505154
Abhd14b	0.39626	-0.133283	0.153	0.161	1	0.57576	0.442477
Timm44	0.326889	-0.133141	0.19	0.168	1	0.453354	0.320212
Ckb	0.0129787	-0.1331	0.376	0.329	1	0.90797	0.77487
Ilf2	0.0886887	-0.133099	0.278	0.299	1	0.645804	0.512705
Ubxn4	0.405543	-0.133061	0.54	0.476	1	0.908908	0.775847
Slc25a11	0.194891	-0.133011	0.279	0.295	1	0.783836	0.650825
Tmem55a	0.316194	-0.132952	0.185	0.195	1	0.512369	0.379418
Sod2	0.363431	-0.132882	0.419	0.412	1	0.807621	0.67474
Phax	0.591788	-0.132878	0.266	0.243	1	0.640864	0.507986
Sgta	0.267527	-0.132876	0.316	0.324	1	0.811714	0.678838
Rnps1	0.724061	-0.132786	0.358	0.325	1	0.677673	0.544887
Nap1l1	0.589381	-0.132712	0.401	0.382	1	0.672095	0.539384
Ppp4c	0.382808	-0.132686	0.443	0.4	1	0.810632	0.677946
2310008H09Rik	0.00092297	-0.132595	0.294	0.223	1	0.543883	0.411288
Mrpl23	0.405558	-0.132539	0.324	0.312	1	0.479946	0.347407
Mif	0.621545	-0.132416	0.537	0.5	1	0.775422	0.643005
Cd320	0.863244	-0.132323	0.18	0.17	1	0.725791	0.593468
Cuedc2	0.80299	-0.132318	0.343	0.315	1	0.804367	0.672049
Wbp5	0.734469	-0.132272	0.536	0.467	1	0.938935	0.806663
Ormdl2	0.785405	-0.132267	0.233	0.227	1	0.588058	0.455791
Pla2g16	0.657901	-0.13216	0.304	0.294	1	0.723643	0.591483
Gabarapl1	0.903326	-0.132143	0.524	0.485	1	0.847605	0.715462
Mir24-2	0.00089737	-0.132102	0.314	0.356	1	0.69335	0.561248
Tspan31	0.588089	-0.132085	0.427	0.415	1	0.999939	0.867854
Gyg	0.454883	-0.131868	0.21	0.216	1	0.621311	0.489442
Sumf2	0.97864	-0.131817	0.116	0.113	1	0.487405	0.355587
Mthfs	0.12594	-0.13175	0.126	0.142	1	0.288987	0.157238
Ghr	0.609432	-0.131698	0.217	0.202	1	0.609107	0.477409
Apoa1bp	0.474881	-0.131692	0.336	0.327	1	0.75611	0.624418
4930420K17Rik	0.131409	-0.131557	0.235	0.249	1	0.484353	0.352796
Sugp1	0.372606	-0.131519	0.151	0.137	1	0.510536	0.379017
Psmd14	0.732032	-0.131349	0.304	0.3	1	0.732233	0.600884
Eef1a1	0.00158773	-0.131317	0.998	0.996	1	3.28952	3.15821
Mir3074-1	4.75064e-15	-0.131205	0.097	0.192	1.08785e-10	0.303506	0.172301
Txnl4a	0.885555	-0.131152	0.521	0.476	1	1.07363	0.942473
Tmem203	0.753262	-0.13113	0.12	0.12	1	0.37349	0.24236
Sirt7	0.385033	-0.131086	0.237	0.212	1	0.66569	0.534604
4930455C21Rik	2.30224e-08	-0.131082	0.13	0.2	0.00052719	0.317544	0.186462
Acadm	0.246739	-0.13097	0.299	0.3	1	0.7187	0.58773
Eif2b3	0.500662	-0.130878	0.121	0.11	1	0.413877	0.282999
BC003331	0.213901	-0.130834	0.235	0.206	1	0.567248	0.436414
Nfkbib	0.477895	-0.130756	0.254	0.232	1	0.548303	0.417547
Yme1l1	6.30419e-07	-0.130658	0.531	0.617	0.014436	0.857984	0.727326
Impdh2	0.826461	-0.130605	0.323	0.304	1	0.710947	0.580342
Rps10	0.258684	-0.130397	0.852	0.765	1	1.04288	0.91248
2410004B18Rik	0.507149	-0.130282	0.16	0.164	1	0.496429	0.366147
Mrpl39	0.486028	-0.130251	0.19	0.193	1	0.500407	0.370157
Ufc1	0.847628	-0.130211	0.271	0.259	1	0.599136	0.468925
Dpcd	0.488767	-0.130199	0.126	0.131	1	0.402054	0.271855
Rwdd1	0.492222	-0.130104	0.434	0.387	1	0.727329	0.597224
Sox17	0.144351	-0.130051	0.542	0.543	1	1.76146	1.63141
Hdhd2	0.410413	-0.13005	0.151	0.135	1	0.462093	0.332043
Vamp5	0.950797	-0.130027	0.462	0.418	1	1.01921	0.889183
Scp2	0.00294168	-0.129941	0.591	0.589	1	1.02666	0.896715
Fam98c	0.0442744	-0.129777	0.134	0.156	1	0.453536	0.323759
Dnaja3	0.000180408	-0.129682	0.231	0.287	1	0.634823	0.505141
Nek6	0.734001	-0.129599	0.105	0.107	1	0.329233	0.199635
Cdk2ap1	0.309748	-0.129559	0.454	0.398	1	0.685721	0.556162
Mapk3	0.13723	-0.12954	0.643	0.596	1	1.04585	0.916305
Prpsap1	0.319969	-0.129499	0.289	0.295	1	0.752011	0.622512
Trp53	0.84598	-0.129472	0.349	0.331	1	0.749763	0.620291
Prps1	0.677638	-0.129369	0.162	0.165	1	0.575305	0.445936
Pgam1	0.00851166	-0.129225	0.375	0.403	1	0.615046	0.485821
Timm23	0.179805	-0.129145	0.338	0.339	1	0.582063	0.452918
Vrk3	0.811143	-0.129084	0.167	0.158	1	0.537166	0.408083
Fam103a1	0.233652	-0.129075	0.323	0.327	1	0.660961	0.531887
Tsfm	0.780732	-0.128909	0.161	0.159	1	0.483647	0.354737
Aga	0.774752	-0.128898	0.162	0.154	1	0.499436	0.370537
Ppwd1	1.1591e-05	-0.128891	0.107	0.161	0.265423	0.284056	0.155165
Tmem199	0.457916	-0.128884	0.118	0.124	1	0.472721	0.343837
Nat9	0.696122	-0.128858	0.11	0.102	1	0.390282	0.261424
Sssca1	0.0151816	-0.128804	0.095	0.119	1	0.32199	0.193186
Pcbd2	0.202281	-0.128549	0.229	0.235	1	0.483374	0.354826
2810408M09Rik	0.104288	-0.128514	0.118	0.136	1	0.451043	0.322529
Dcun1d5	0.843616	-0.128366	0.295	0.276	1	0.575552	0.447186
Eif3f	0.474727	-0.12827	0.618	0.594	1	1.05482	0.926549
Nudt14	0.623452	-0.12818	0.166	0.17	1	0.554144	0.425964
Tsen15	0.711092	-0.128078	0.155	0.155	1	0.548683	0.420606
Son	1.46221e-06	-0.127898	0.882	0.855	0.033483	1.12884	1.00094
Fam174a	0.777884	-0.127834	0.355	0.327	1	0.841761	0.713927
Nrm	0.163701	-0.127797	0.103	0.118	1	0.348201	0.220404
Lin7c	0.017628	-0.127441	0.225	0.178	1	0.459858	0.332417
Luzp1	0.280347	-0.127415	0.654	0.567	1	1.26565	1.13823
Acyp1	0.18228	-0.127314	0.12	0.135	1	0.333495	0.206182
Vkorc1	0.940447	-0.127222	0.385	0.359	1	0.775985	0.648764
Igsf3	0.0515502	-0.127191	0.103	0.123	1	0.326888	0.199697
Gstm7	0.876474	-0.127183	0.128	0.122	1	0.742848	0.615665
Fry	0.499454	-0.127173	0.565	0.545	1	1.27403	1.14686
Fxc1	0.183472	-0.126999	0.382	0.385	1	0.671199	0.5442
Josd2	0.470334	-0.126729	0.182	0.185	1	0.420086	0.293357
Dcdc2b	0.0272121	-0.126521	0.231	0.256	1	0.414114	0.287593
1700021F05Rik	0.388706	-0.12635	0.119	0.105	1	0.302341	0.17599
Exosc2	8.90773e-14	-0.126328	0.336	0.476	2.03978e-09	0.441448	0.315121
Isca1	0.33042	-0.126273	0.251	0.254	1	0.656722	0.530449
Mustn1	0.779075	-0.126246	0.186	0.184	1	0.690834	0.564588
Glrx5	0.973131	-0.126196	0.307	0.288	1	0.662699	0.536504
Sft2d1	0.245229	-0.126114	0.417	0.406	1	0.811243	0.685128
Mfng	0.0951363	-0.126044	0.306	0.322	1	0.94609	0.820047
Snhg6	0.361378	-0.126004	0.133	0.14	1	0.289595	0.163591
Dap3	0.0752863	-0.125969	0.21	0.179	1	0.485532	0.359562
Tgif1	0.0134088	-0.125937	0.144	0.175	1	0.385323	0.259386
Ssb	0.911908	-0.125849	0.648	0.566	1	1.0005	0.874651
Smarcb1	0.779913	-0.125841	0.302	0.291	1	0.699558	0.573717
Gse1	0.121792	-0.125606	0.203	0.172	1	0.41624	0.290634
Mpdu1	0.903114	-0.125457	0.147	0.142	1	0.456569	0.331112
Vmac	0.0830698	-0.125397	0.097	0.115	1	0.450492	0.325094
Tubb2a	0.236894	-0.125324	0.553	0.547	1	1.38849	1.26316
Fam57a	0.0708316	-0.125324	0.112	0.132	1	0.454815	0.329492
Lman2	0.695736	-0.125281	0.471	0.441	1	0.956821	0.83154
Pgrmc1	0.098116	-0.125261	0.565	0.566	1	1.30612	1.18086
Creld1	0.975698	-0.125227	0.15	0.143	1	0.529587	0.40436
Mphosph10	0.216839	-0.125145	0.178	0.152	1	0.453721	0.328576
Znhit3	0.832095	-0.125143	0.106	0.101	1	0.401415	0.276272
S100a11	0.000214586	-0.124879	0.716	0.688	1	0.920219	0.79534
Llph	0.826052	-0.124809	0.296	0.284	1	0.452725	0.327916
Polr2f	0.394098	-0.124758	0.426	0.37	1	0.690092	0.565334
Ubl7	0.391316	-0.124659	0.309	0.275	1	0.627554	0.502895
Mettl5	0.12613	-0.124659	0.102	0.118	1	0.303722	0.179064
2810428I15Rik	0.405127	-0.124642	0.332	0.293	1	0.592718	0.468076
Commd10	0.246619	-0.124622	0.181	0.191	1	0.5002	0.375578
Psma4	0.673143	-0.124616	0.437	0.396	1	0.892757	0.768141
2010111I01Rik	0.585473	-0.124544	0.301	0.274	1	0.667073	0.54253
Naa10	0.68404	-0.124514	0.197	0.184	1	0.455527	0.331014
Lrrfip1	0.194992	-0.124499	0.394	0.349	1	0.829974	0.705474
Eno1	0.0874782	-0.124467	0.588	0.56	1	0.664737	0.54027
Morf4l1	0.8356	-0.124368	0.829	0.793	1	0.941886	0.817518
Eif4ebp1	0.030091	-0.124359	0.262	0.211	1	0.564757	0.440398
Mrps7	0.833145	-0.124077	0.287	0.27	1	0.704353	0.580276
1110031I02Rik	0.448025	-0.123971	0.098	0.104	1	0.432189	0.308218
Smarce1	0.0736347	-0.123514	0.428	0.372	1	0.692298	0.568784
Ccnl1	0.113347	-0.123322	0.59	0.517	1	1.07827	0.954951
Chmp6	0.576061	-0.123182	0.254	0.252	1	0.753967	0.630786
Bola1	0.239056	-0.12318	0.111	0.121	1	0.338318	0.215138
Uqcrfs1	0.567993	-0.12289	0.425	0.412	1	0.892925	0.770035
Zdhhc4	0.35789	-0.122867	0.184	0.163	1	0.546681	0.423814
Srm	0.0364125	-0.122854	0.165	0.193	1	0.429675	0.306821
Esf1	0.636152	-0.122836	0.247	0.243	1	0.543277	0.420441
Ppid	0.927139	-0.122746	0.27	0.256	1	0.625104	0.502358
Sap30	0.0144088	-0.122716	0.085	0.11	1	0.321578	0.198862
Tex2	0.0139786	-0.122675	0.156	0.119	1	0.429291	0.306616
Aup1	0.071881	-0.122662	0.452	0.399	1	0.835509	0.712848
Hmg20b	0.00103299	-0.122638	0.414	0.323	1	0.597351	0.474713
Cdc37	0.904414	-0.122625	0.596	0.53	1	1.04513	0.922505
Tppp3	0.0128659	-0.122589	0.296	0.331	1	1.11725	0.994663
0610009B22Rik	0.0673634	-0.122505	0.13	0.149	1	0.419428	0.296922
Clec14a	0.04007	-0.122448	0.516	0.532	1	1.96444	1.84199
Pts	0.698921	-0.122444	0.132	0.134	1	0.409632	0.287188
Cnot8	0.438514	-0.122427	0.31	0.315	1	0.753059	0.630632
Scand1	0.592968	-0.122182	0.415	0.381	1	0.383357	0.261176
Nsmce1	0.051392	-0.122113	0.37	0.31	1	0.812404	0.690291
Parl	0.517148	-0.122029	0.194	0.177	1	0.520911	0.398882
Rad1	0.00804541	-0.121854	0.079	0.106	1	0.332683	0.210829
Adamts10	0.42104	-0.12181	0.145	0.131	1	0.429755	0.307944
Ccdc75	0.823385	-0.121806	0.139	0.132	1	0.424994	0.303188
Rsu1	0.465105	-0.12174	0.583	0.53	1	1.18691	1.06517
2310033P09Rik	0.51194	-0.121698	0.188	0.19	1	0.455884	0.334186
Ube2b	0.257395	-0.12161	0.62	0.589	1	1.01625	0.894641
Igf2r	2.91105e-05	-0.121583	0.284	0.343	0.666601	0.52265	0.401067
H2-T24	0.509769	-0.121453	0.269	0.273	1	0.784224	0.662771
Sertad3	0.196863	-0.121424	0.115	0.128	1	0.45157	0.330146
Rars	0.966798	-0.121261	0.209	0.204	1	0.561743	0.440482
Tusc2	0.44696	-0.121167	0.242	0.219	1	0.593177	0.472009
Ltv1	0.103952	-0.121145	0.127	0.145	1	0.411801	0.290656
Anapc11	0.00368522	-0.12113	0.508	0.539	1	0.68436	0.563229
Tmem66	0.808171	-0.121019	0.692	0.665	1	1.6136	1.49258
Aif1l	0.0694148	-0.120929	0.082	0.101	1	0.597997	0.477068
2610507I01Rik	0.0418925	-0.120886	0.088	0.109	1	0.3671	0.246214
Rg9mtd1	0.0134367	-0.120831	0.095	0.122	1	0.336137	0.215306
Cox11	0.12161	-0.120708	0.089	0.104	1	0.317635	0.196927
Sgpp2	0.812334	-0.120677	0.125	0.121	1	0.738255	0.617578
Pdcd2l	0.527292	-0.120649	0.125	0.129	1	0.415479	0.29483
Acsl4	0.0126249	-0.120516	0.248	0.28	1	0.478227	0.357711
Mkks	0.232559	-0.120488	0.146	0.157	1	0.424072	0.303584
Gins4	0.423686	-0.120463	0.155	0.141	1	0.489885	0.369421
Mterfd1	0.776304	-0.120454	0.182	0.173	1	0.539273	0.41882
Fam173a	0.398986	-0.120422	0.193	0.196	1	0.467974	0.347551
Ftsj1	0.608848	-0.120286	0.137	0.127	1	0.453723	0.333437
Fdx1	0.975232	-0.120265	0.257	0.246	1	0.552944	0.432679
Ssbp3	0.419808	-0.120239	0.251	0.259	1	0.493144	0.372905
Rnf5	0.726907	-0.120197	0.168	0.156	1	0.39814	0.277944
Nfs1	0.985455	-0.120132	0.138	0.134	1	0.462953	0.342821
Snrnp40	0.160689	-0.120119	0.177	0.193	1	0.544391	0.424272
Tmx4	0.0146517	-0.119981	0.185	0.146	1	0.433735	0.313754
Fam60a	0.0937305	-0.119803	0.156	0.177	1	0.393889	0.274086
Asl	0.467116	-0.119693	0.1	0.108	1	0.385728	0.266035
Rbfa	0.997288	-0.119664	0.19	0.186	1	0.525832	0.406168
Rpl23	0.0186226	-0.119653	0.904	0.823	1	1.15884	1.03919
Ccdc107	0.312558	-0.119616	0.153	0.162	1	0.396346	0.27673
Lmo2	0.186624	-0.119555	0.515	0.524	1	1.01024	0.890683
Tomm34	0.665569	-0.119479	0.289	0.282	1	0.620179	0.500701
Dnajc9	0.852081	-0.119465	0.152	0.149	1	0.400454	0.280989
2310045N01Rik	0.730803	-0.119381	0.182	0.183	1	0.471938	0.352556
Mrpl30	0.834117	-0.119302	0.336	0.316	1	0.559315	0.440013
Crcp	0.716895	-0.119254	0.125	0.116	1	0.450248	0.330994
Snhg3	0.372626	-0.119139	0.203	0.182	1	0.415795	0.296656
Sf3a3	0.667771	-0.118785	0.265	0.244	1	0.713758	0.594973
Gosr1	0.0608373	-0.118712	0.158	0.131	1	0.394585	0.275873
Lass5	0.303386	-0.118619	0.38	0.38	1	0.972785	0.854166
Irf3	0.0182953	-0.118459	0.331	0.272	1	0.732631	0.614172
Nme3	0.208391	-0.118195	0.175	0.189	1	0.463157	0.344962
Polr3d	0.0516153	-0.117874	0.092	0.112	1	0.306508	0.188634
Cd44	0.570291	-0.117745	0.129	0.135	1	0.359917	0.242172
Bloc1s2	0.306414	-0.117709	0.156	0.165	1	0.407559	0.28985
2810432D09Rik	0.734533	-0.117579	0.155	0.156	1	0.474742	0.357163
Amigo2	0.183355	-0.117577	0.128	0.142	1	0.682199	0.564623
Pfdn2	0.293186	-0.117413	0.288	0.291	1	0.43491	0.317497
Slmo2	0.772498	-0.117401	0.185	0.184	1	0.487738	0.370337
Ngrn	0.702882	-0.117365	0.134	0.135	1	0.474611	0.357246
Taf11	0.492664	-0.117363	0.168	0.152	1	0.479685	0.362322
Tor1a	0.822963	-0.117361	0.24	0.234	1	0.63939	0.522029
Ndufaf4	0.690847	-0.117324	0.16	0.16	1	0.394064	0.27674
Diablo	0.469318	-0.11718	0.221	0.203	1	0.643216	0.526036
Ccdc32	0.601052	-0.117095	0.139	0.142	1	0.489074	0.371978
Zfp329	0.520807	-0.116946	0.139	0.145	1	0.447127	0.330181
Gpr137b-ps	0.874994	-0.116891	0.205	0.201	1	0.536961	0.420071
Mphosph6	0.927501	-0.116886	0.138	0.133	1	0.413707	0.29682
Glo1	0.18125	-0.116691	0.346	0.351	1	0.737448	0.620756
Ndnl2	0.446725	-0.116641	0.195	0.199	1	0.555223	0.438582
Igbp1	0.553518	-0.116624	0.198	0.181	1	0.487836	0.371212
A730098P11Rik	4.39579e-05	-0.116554	0.281	0.341	1	0.253053	0.1365
Rfxank	0.310284	-0.116377	0.166	0.177	1	0.442027	0.32565
Stk19	0.683149	-0.116329	0.14	0.131	1	0.410889	0.29456
Chic2	0.927751	-0.116203	0.287	0.274	1	0.57354	0.457337
BC013529	0.32124	-0.116136	0.507	0.497	1	1.15476	1.03863
Lage3	0.982757	-0.116134	0.176	0.17	1	0.441014	0.32488
Gnptg	0.8364	-0.116042	0.206	0.202	1	0.520865	0.404824
Rab13	0.0830438	-0.115945	0.169	0.14	1	0.531727	0.415782
Arhgdia	0.77831	-0.115871	0.864	0.795	1	1.57849	1.46262
Rnf122	2.01033e-05	-0.115827	0.153	0.214	0.460344	0.380704	0.264877
Rnf34	0.794516	-0.11553	0.128	0.128	1	0.400235	0.284706
Ensa	0.567201	-0.115496	0.37	0.365	1	0.716494	0.600998
Cript	0.777107	-0.115415	0.41	0.382	1	0.866536	0.751121
Maged2	0.0992547	-0.115323	0.183	0.205	1	0.567779	0.452456
Trappc3	0.860706	-0.11523	0.324	0.302	1	0.768987	0.653756
Spon1	0.0322447	-0.11509	0.083	0.105	1	0.316494	0.201404
Zfp275	0.0720034	-0.114771	0.106	0.083	1	0.337246	0.222476
Dpf2	0.431354	-0.114719	0.276	0.278	1	0.610838	0.496119
Rap2b	1.97256e-07	-0.114688	0.183	0.258	0.00451697	0.337515	0.222826
Mettl11a	0.611682	-0.114679	0.146	0.149	1	0.448087	0.333409
Skp1a	0.454397	-0.114586	0.733	0.67	1	1.18032	1.06574
Nucb2	0.0541441	-0.114584	0.19	0.155	1	0.387934	0.27335
Dscr3	0.613637	-0.114555	0.213	0.214	1	0.683779	0.569224
Gpr108	0.315533	-0.114524	0.239	0.213	1	0.594966	0.480442
Snx11	0.563499	-0.114482	0.153	0.157	1	0.63417	0.519688
Nop16	0.964839	-0.114185	0.158	0.153	1	0.435858	0.321673
Rfc2	0.359109	-0.114105	0.208	0.184	1	0.530299	0.416193
Ankmy2	0.000227956	-0.114098	0.144	0.192	1	0.503682	0.389584
Gps2	0.0940992	-0.11409	0.355	0.303	1	0.587328	0.473239
Psmd13	0.453305	-0.114042	0.366	0.337	1	0.848785	0.734743
Deaf1	0.0595493	-0.113968	0.166	0.135	1	0.420186	0.306218
Mdp1	0.795453	-0.11392	0.217	0.213	1	0.633595	0.519675
Ppp2r3c	0.142713	-0.113823	0.121	0.1	1	0.288037	0.174214
Casc4	0.00289233	-0.113739	0.104	0.138	1	0.327598	0.213859
Nudt21	0.289015	-0.113483	0.172	0.18	1	0.365298	0.251815
Enoph1	0.620324	-0.113479	0.108	0.111	1	0.423966	0.310488
Eif3e	0.729709	-0.113396	0.472	0.446	1	0.9171	0.803704
Exosc8	0.571223	-0.113386	0.258	0.258	1	0.426023	0.312637
3110040N11Rik	0.681125	-0.113379	0.108	0.1	1	0.3352	0.221821
Gm694	0.980616	-0.11337	0.143	0.14	1	0.937324	0.823954
Asb6	0.329549	-0.113269	0.103	0.089	1	0.371932	0.258663
Rbm34	0.101055	-0.113245	0.139	0.115	1	0.360837	0.247593
Snhg5	0.820415	-0.113164	0.128	0.129	1	0.366012	0.252848
G6pc3	0.860857	-0.113114	0.14	0.139	1	0.387034	0.27392
Ufd1l	0.700493	-0.113022	0.291	0.274	1	0.692458	0.579436
Dnajb6	0.446479	-0.113001	0.515	0.456	1	0.751453	0.638452
Plekha8	0.000840786	-0.112993	0.109	0.071	1	0.364327	0.251334
Zfp524	0.499419	-0.112916	0.103	0.108	1	0.431701	0.318785
Nudt19	0.860106	-0.11285	0.116	0.112	1	0.353715	0.240864
2010012O05Rik	0.74653	-0.112741	0.113	0.107	1	0.334509	0.221768
Fam192a	0.443208	-0.112723	0.206	0.188	1	0.549605	0.436881
Med6	0.300403	-0.112643	0.175	0.185	1	0.52221	0.409567
Ccdc28b	0.0437509	-0.112629	0.241	0.198	1	0.554557	0.441929
Ddx39b	0.505126	-0.112583	0.457	0.445	1	0.958257	0.845674
Araf	0.835397	-0.112517	0.34	0.323	1	0.790619	0.678102
Gpn3	0.924514	-0.112499	0.12	0.116	1	0.449664	0.337165
Prosc	0.564769	-0.112415	0.213	0.216	1	0.574494	0.462079
D230037D09Rik	0.45112	-0.112368	0.136	0.142	1	0.426065	0.313697
Rpa3	0.577824	-0.112241	0.168	0.155	1	0.435382	0.323141
Exosc9	0.448387	-0.112209	0.14	0.149	1	0.523931	0.411721
Blvra	0.904141	-0.112158	0.177	0.173	1	0.493024	0.380866
Psmd10	0.882999	-0.112065	0.157	0.151	1	0.46191	0.349845
Kif2a	0.334846	-0.112043	0.248	0.222	1	0.499652	0.387609
Angel2	0.384164	-0.112042	0.284	0.288	1	0.636551	0.524509
Fuca1	0.966254	-0.112014	0.377	0.36	1	0.826808	0.714794
Pcmt1	0.413691	-0.111945	0.387	0.357	1	0.882871	0.770926
Znrd1	0.792421	-0.111823	0.238	0.233	1	0.489873	0.37805
Stoml1	0.768574	-0.111651	0.108	0.108	1	0.427962	0.316311
Thap11	0.56306	-0.111626	0.199	0.201	1	0.629841	0.518215
Nvl	0.0939077	-0.111557	0.179	0.196	1	0.366936	0.255378
Tfrc	0.171594	-0.111547	0.201	0.174	1	0.822527	0.71098
Nol12	0.466587	-0.111397	0.106	0.094	1	0.338446	0.227049
Eif3h	0.636602	-0.111332	0.57	0.536	1	1.03422	0.922884
Drap1	0.0850049	-0.111235	0.517	0.431	1	0.533691	0.422456
Amdhd2	0.734328	-0.111182	0.106	0.1	1	0.378404	0.267222
Ruvbl2	0.934146	-0.111112	0.185	0.179	1	0.572663	0.461551
2410003K15Rik	0.653506	-0.1111	0.181	0.168	1	0.430124	0.319024
Cd83	0.000937539	-0.111043	0.076	0.11	1	0.257607	0.146564
Rab7l1	0.320699	-0.110912	0.192	0.17	1	0.525684	0.414773
Ergic2	0.245471	-0.110892	0.248	0.22	1	0.629217	0.518325
Cox10	0.942701	-0.110863	0.108	0.106	1	0.368522	0.257658
Cops5	0.0301939	-0.110852	0.287	0.238	1	0.570976	0.460124
Clu	0.000402401	-0.110826	0.345	0.403	1	1.83331	1.72248
Tor2a	0.769338	-0.110648	0.168	0.16	1	0.491343	0.380696
5730455O13Rik	0.473474	-0.110518	0.107	0.098	1	0.326315	0.215797
Mad2l2	0.659952	-0.110517	0.177	0.165	1	0.550861	0.440344
Dnajc24	0.608805	-0.110495	0.126	0.116	1	0.357262	0.246767
Sar1b	0.196576	-0.110444	0.366	0.369	1	0.867648	0.757203
Ica1	0.274476	-0.110338	0.28	0.247	1	0.835027	0.724689
Gbp2	0.206732	-0.11027	0.408	0.424	1	1.18108	1.07081
Mrpl43	0.960459	-0.110246	0.245	0.233	1	0.562562	0.452315
Stx6	0.407387	-0.110189	0.273	0.278	1	0.741632	0.631443
Cby1	0.42911	-0.11002	0.115	0.102	1	0.379713	0.269693
Cct7	0.506225	-0.109894	0.576	0.558	1	1.26742	1.15753
Rbmxl1	0.386256	-0.109718	0.273	0.274	1	0.591422	0.481704
Eif1ax	0.224347	-0.10966	0.277	0.242	1	0.477928	0.368268
Crem	0.717864	-0.10961	0.273	0.253	1	0.693013	0.583402
Mrpl16	0.230398	-0.109468	0.127	0.11	1	0.377989	0.268521
Ubl4	0.130532	-0.109164	0.209	0.226	1	0.59893	0.489765
Med29	0.568147	-0.109158	0.239	0.219	1	0.524209	0.415051
Jkamp	0.638996	-0.109086	0.29	0.285	1	0.76697	0.657884
Tuba4a	0.592005	-0.10903	0.19	0.198	1	0.452938	0.343908
2310039H08Rik	0.380714	-0.108931	0.14	0.148	1	0.345516	0.236585
Rpl29	0.0494279	-0.108879	0.816	0.738	1	1.23493	1.12605
Pbx1	0.734403	-0.108834	0.256	0.245	1	0.687632	0.578798
2010011I20Rik	0.60845	-0.108754	0.189	0.191	1	0.560899	0.452145
Dhrs1	0.170443	-0.108743	0.238	0.209	1	0.714327	0.605584
Nt5c3l	0.419836	-0.108648	0.168	0.174	1	0.483892	0.375244
Slc35e4	0.696823	-0.10862	0.162	0.163	1	0.580291	0.471671
Prr24	0.00663541	-0.108443	0.165	0.122	1	0.431583	0.32314
Tra2b	0.242098	-0.108439	0.67	0.596	1	0.976196	0.867757
Mrps10	0.842723	-0.108255	0.115	0.114	1	0.368112	0.259857
Lrpap1	0.937115	-0.10825	0.499	0.472	1	1.12089	1.01264
Pdhb	0.373659	-0.10821	0.391	0.36	1	0.927294	0.819083
Esam	0.0421941	-0.108137	0.88	0.889	1	2.78617	2.67803
Tor1b	0.573972	-0.108115	0.287	0.264	1	0.676867	0.568752
BC017612	0.852997	-0.108087	0.526	0.474	1	0.941008	0.832921
Sdhaf2	0.244	-0.107899	0.218	0.192	1	0.580438	0.472539
Sars	0.371233	-0.107634	0.343	0.312	1	0.725534	0.6179
Ift27	0.827778	-0.10753	0.156	0.148	1	0.389715	0.282185
2310001H17Rik	0.0764547	-0.107454	0.092	0.109	1	0.269243	0.161788
Brix1	0.824308	-0.107442	0.225	0.215	1	0.487965	0.380523
Ppil2	0.147176	-0.10741	0.262	0.279	1	0.670179	0.562768
Cnih4	0.727442	-0.10734	0.37	0.34	1	0.689907	0.582567
Ikbip	0.169705	-0.107163	0.176	0.151	1	0.438924	0.33176
Slc35b1	0.122358	-0.107091	0.36	0.308	1	0.833621	0.72653
Sp110	0.0576794	-0.106849	0.256	0.214	1	0.553663	0.446814
Rab11b	0.664159	-0.106447	0.683	0.619	1	1.18822	1.08177
Mum1	0.333493	-0.106397	0.245	0.221	1	0.714014	0.607617
Zbtb4	0.0146307	-0.106346	0.369	0.304	1	0.638982	0.532636
Ocln	0.00295654	-0.106319	0.208	0.256	1	1.08138	0.975057
Rpl34	0.000394885	-0.106308	0.269	0.323	1	0.310448	0.20414
Aspscr1	0.644783	-0.106148	0.221	0.205	1	0.637522	0.531374
Dmap1	0.47922	-0.106133	0.119	0.107	1	0.43481	0.328677
Rad9	0.0854558	-0.106014	0.158	0.18	1	0.334797	0.228784
Lin52	0.615384	-0.106011	0.117	0.121	1	0.432323	0.326313
Adprhl2	0.0720153	-0.105966	0.139	0.162	1	0.545135	0.439169
Dusp22	0.820232	-0.105953	0.204	0.202	1	0.634655	0.528702
Eif2b1	0.858236	-0.105845	0.163	0.16	1	0.524308	0.418463
Eif2s1	0.527194	-0.105737	0.324	0.305	1	0.687642	0.581905
Srsf3	0.925141	-0.105613	0.697	0.628	1	1.11979	1.01417
Mrps35	0.998653	-0.10547	0.104	0.102	1	0.341664	0.236194
Dut	0.0641079	-0.105451	0.09	0.108	1	0.282493	0.177042
Tpm1	0.168339	-0.105439	0.62	0.602	1	1.23817	1.13273
Hey1	0.0563688	-0.105412	0.222	0.251	1	1.07316	0.967749
1110034G24Rik	0.603042	-0.105395	0.161	0.164	1	0.710406	0.605011
Stx8	0.97669	-0.105355	0.192	0.187	1	0.492301	0.386945
Uqcrc2	0.671991	-0.105311	0.444	0.427	1	0.984434	0.879123
Casp8	0.0991206	-0.105199	0.34	0.299	1	0.863979	0.758779
Nutf2	0.0222988	-0.105152	0.269	0.296	1	0.417546	0.312394
Timm17b	0.64324	-0.105129	0.231	0.215	1	0.522858	0.417728
Pold3	0.717598	-0.105034	0.138	0.132	1	0.418985	0.313951
Edn1	0.0696171	-0.104956	0.205	0.232	1	0.862853	0.757898
Rab33b	0.942361	-0.104888	0.132	0.13	1	0.414927	0.310039
Ube2h	0.106705	-0.104775	0.499	0.444	1	0.882132	0.777357
Sfxn1	0.413383	-0.104767	0.176	0.159	1	0.420074	0.315307
BC031781	0.809734	-0.104633	0.269	0.249	1	0.511407	0.406774
Sltm	0.0204103	-0.104516	0.311	0.255	1	0.530111	0.425596
Commd5	0.798228	-0.104507	0.114	0.108	1	0.42754	0.323032
Fam189a2	0.00548859	-0.104477	0.221	0.171	1	0.525853	0.421376
Pla2g12a	0.572382	-0.104351	0.182	0.167	1	0.520656	0.416305
Rbmx	0.582116	-0.104304	0.2	0.187	1	0.561324	0.45702
Uchl3	0.553752	-0.104279	0.141	0.144	1	0.344811	0.240532
Rgs19	0.684114	-0.104239	0.151	0.153	1	0.406862	0.302623
Nipsnap3b	0.335885	-0.104098	0.185	0.194	1	0.525034	0.420936
Mrpl2	0.276376	-0.104031	0.241	0.212	1	0.601555	0.497524
2810021B07Rik	0.607495	-0.104028	0.194	0.179	1	0.404783	0.300756
Slx1b	0.158895	-0.103882	0.135	0.152	1	0.407451	0.303569
Isyna1	0.0482748	-0.103859	0.301	0.327	1	1.03149	0.927628
Nxt1	0.0568989	-0.103722	0.146	0.168	1	0.452778	0.349055
Smg7	8.77242e-07	-0.103668	0.376	0.442	0.020088	0.538096	0.434428
Itpa	0.811968	-0.103572	0.194	0.191	1	0.542049	0.438477
Drg1	0.863071	-0.103563	0.368	0.351	1	0.893102	0.789539
Trappc2	0.0549613	-0.103526	0.148	0.171	1	0.51479	0.411264
Stx3	0.787976	-0.103484	0.287	0.271	1	0.777668	0.674184
Thap3	0.380496	-0.103418	0.231	0.207	1	0.466028	0.36261
A930005H10Rik	0.815725	-0.103289	0.107	0.107	1	0.314358	0.211069
Rfng	0.336777	-0.103239	0.112	0.121	1	0.373504	0.270265
Tfpt	0.662869	-0.103235	0.11	0.112	1	0.34631	0.243076
Yif1b	0.644832	-0.103198	0.414	0.383	1	0.944385	0.841187
Fam3c	4.33444e-05	-0.103194	0.418	0.494	0.992543	0.782864	0.67967
Mrpl11	0.500006	-0.103178	0.204	0.185	1	0.497676	0.394498
Pex7	0.551394	-0.103159	0.097	0.102	1	0.325597	0.222438
Il15	0.340406	-0.103144	0.113	0.099	1	0.465154	0.36201
Ppp1r15a	0.384991	-0.103081	0.556	0.531	1	1.59143	1.48835
Plk2	0.979368	-0.102971	0.651	0.642	1	1.74293	1.63996
Pdcd10	0.663009	-0.102968	0.446	0.41	1	0.796634	0.693666
Btd	0.305996	-0.102956	0.179	0.19	1	0.578636	0.47568
Canx	0.218988	-0.102955	0.852	0.814	1	1.67791	1.57495
Terf1	0.530305	-0.102938	0.165	0.152	1	0.494327	0.391389
Imp3	0.187666	-0.102861	0.301	0.262	1	0.674764	0.571903
Aldoa	0.573091	-0.102821	0.872	0.826	1	2.00191	1.89909
Aatf	0.402564	-0.102794	0.115	0.103	1	0.376403	0.27361
[truncated: 5,746 more rows]

## Sheet: 18 mo
Supplemental Table 2. Differential expression of genes in females and males at 18 months
	p_val	avg_logFC	pct.1	pct.2	p_val_adj	female	male
Xist	0	-2.20714	0.001	0.884	0	2.20943	0.00229494
Rn45s	8.20646e-126	-1.37511	0.927	0.981	1.6298e-121	3.71825	2.34314
Beta-s	0.299245	-1.3614	0.322	0.368	1	3.55808	2.19668
Acta2	0.000145112	-0.858915	0.075	0.116	1	1.75482	0.895902
Cfh	2.86909e-16	-0.828697	0.087	0.188	5.698e-12	1.45267	0.623976
A130040M12Rik	9.66162e-31	-0.779352	0.216	0.401	1.9188e-26	1.34878	0.569425
Cpe	5.41724e-25	-0.766133	0.121	0.266	1.07586e-20	1.44411	0.677972
Cytl1	5.39612e-15	-0.751126	0.147	0.26	1.07167e-10	1.95415	1.20302
Tagln	6.96038e-08	-0.682611	0.107	0.176	0.00138233	1.56318	0.880568
Kdm6b	2.03441e-33	-0.661658	0.381	0.583	4.04033e-29	1.47719	0.815533
Ddx3x	1.32186e-72	-0.635926	0.624	0.839	2.62521e-68	1.84162	1.2057
Wdr92	2.76748e-20	-0.599489	0.134	0.269	5.49622e-16	0.907899	0.30841
Akap12	3.0802e-24	-0.57121	0.44	0.601	6.11728e-20	1.63062	1.05941
Apoe	5.64962e-12	-0.554349	0.672	0.761	1.12201e-07	2.92763	2.37328
Myl9	0.00939894	-0.548149	0.094	0.123	1	1.23654	0.68839
Cd74	9.76799e-12	-0.535068	0.575	0.717	1.93992e-07	2.93617	2.4011
Selp	5.67916e-05	-0.49641	0.122	0.176	1	2.12172	1.62531
Emp1	0.984499	-0.494597	0.582	0.571	1	2.49777	2.00317
Rps28	1.29397e-64	-0.487896	0.95	0.988	2.56982e-60	3.2863	2.7984
Igf2	9.50372e-08	-0.477825	0.061	0.117	0.00188744	0.821881	0.344055
Rbp1	9.9107e-16	-0.467157	0.121	0.232	1.96827e-11	0.86278	0.395623
Rps15a-ps6	8.65178e-50	-0.449581	0.521	0.763	1.71824e-45	1.58063	1.13104
Hbegf	1.48106e-14	-0.448726	0.257	0.388	2.94138e-10	1.30622	0.857499
Malat1	1.51884e-58	-0.447146	0.987	0.999	3.01642e-54	5.78622	5.33907
Ccnd2	5.95208e-31	-0.444471	0.323	0.529	1.18208e-26	1.12029	0.67582
Nfkbiz	3.02375e-28	-0.442615	0.332	0.524	6.00516e-24	1.24252	0.799907
Bace2	3.10323e-15	-0.427944	0.133	0.245	6.16302e-11	0.730628	0.302684
Csf3	9.04538e-06	-0.422024	0.067	0.117	0.179641	1.76225	1.34023
Rps27	1.86959e-62	-0.420545	0.97	0.992	3.71301e-58	3.11999	2.69945
Ltbp4	1.69761e-24	-0.419752	0.521	0.693	3.37145e-20	1.89409	1.47434
Rps15a-ps4	7.22906e-50	-0.403573	0.677	0.877	1.43569e-45	1.88424	1.48067
Nfia	1.28459e-29	-0.400458	0.291	0.485	2.55119e-25	0.97268	0.572222
Vcam1	1.19879e-14	-0.398162	0.182	0.313	2.3808e-10	1.46542	1.06726
Gm15421	2.35208e-40	-0.398	0.32	0.567	4.67123e-36	1.02573	0.627727
Ppp1r15a	3.56404e-21	-0.396569	0.583	0.737	7.07819e-17	1.88216	1.48559
Igfbp5	4.54767e-08	-0.394293	0.14	0.221	0.000903167	1.66765	1.27336
Nr4a1	5.13682e-20	-0.389388	0.388	0.559	1.02017e-15	1.55752	1.16813
Ahnak	2.67259e-37	-0.38592	0.686	0.854	5.30776e-33	1.90408	1.51816
Pam	4.33712e-19	-0.384815	0.33	0.486	8.61352e-15	1.09143	0.706616
Bgn	3.89662e-10	-0.376695	0.355	0.458	7.73869e-06	1.59329	1.2166
Rasd1	2.51865e-14	-0.370054	0.132	0.243	5.00205e-10	0.752059	0.382005
H2-Ab1	1.95863e-06	-0.369507	0.448	0.549	0.0388985	1.86092	1.49142
A730098P11Rik	1.37902e-36	-0.368271	0.275	0.514	2.73874e-32	0.866628	0.498357
Nfib	1.95288e-32	-0.36574	0.591	0.754	3.87842e-28	1.51045	1.14471
Rcan1	1.58466e-05	-0.364624	0.325	0.404	0.314714	1.52699	1.16237
Ptprb	4.14003e-23	-0.363617	0.767	0.867	8.2221e-19	2.27979	1.91617
Rpl31-ps12	7.55379e-44	-0.362261	0.69	0.87	1.50018e-39	1.91002	1.54775
Cdc42ep3	2.9359e-13	-0.358333	0.389	0.518	5.83069e-09	1.31311	0.954775
Gas5	5.3988e-24	-0.356827	0.705	0.805	1.0722e-19	1.84384	1.48702
Dcn	3.22704e-11	-0.355296	0.295	0.409	6.40889e-07	1.19852	0.84322
Pabpc1	1.43027e-31	-0.346968	0.671	0.83	2.84053e-27	1.67826	1.33129
Slc38a2	1.93508e-22	-0.345686	0.484	0.651	3.84306e-18	1.31177	0.96608
Oaz1	3.20677e-43	-0.345138	0.73	0.863	6.36865e-39	1.77108	1.42595
Cgnl1	2.03571e-19	-0.343107	0.09	0.206	4.04293e-15	0.564865	0.221757
Pcp4l1	4.70024e-16	-0.338282	0.235	0.374	9.33467e-12	0.926876	0.588594
Mef2c	1.64032e-23	-0.3331	0.343	0.531	3.25767e-19	0.984624	0.651524
Comp	5.03621e-18	-0.332366	0.036	0.12	1.00019e-13	0.508165	0.175798
Ccnl1	5.8892e-25	-0.331828	0.512	0.684	1.16959e-20	1.36333	1.0315
H2-Q4	2.02936e-24	-0.331155	0.744	0.851	4.03032e-20	1.8735	1.54234
Sik1	1.74254e-26	-0.329536	0.266	0.458	3.46068e-22	0.817843	0.488307
Bmpr2	5.70884e-12	-0.329499	0.142	0.234	1.13378e-07	0.591783	0.262284
Tpm1	1.9515e-09	-0.322825	0.423	0.529	3.87568e-05	1.26936	0.946532
Npr3	0.0948663	-0.319635	0.286	0.302	1	1.15892	0.839282
Mat2a	1.36105e-25	-0.315347	0.644	0.774	2.70304e-21	1.63985	1.32451
Ddit4	1.71477e-12	-0.315139	0.504	0.62	3.40552e-08	1.53083	1.21569
Scn7a	0.421687	-0.314822	0.182	0.182	1	0.819577	0.504755
Klf6	1.06227e-17	-0.314471	0.745	0.825	2.10966e-13	2.04191	1.72744
Abcb1a	5.95437e-23	-0.31275	0.208	0.372	1.18254e-18	0.711988	0.399238
Chd4	5.34038e-21	-0.305494	0.333	0.492	1.0606e-16	0.906642	0.601148
Gm1821	2.43285e-25	-0.304522	0.806	0.918	4.83164e-21	2.07601	1.77149
Pcdh17	3.05796e-10	-0.303256	0.284	0.38	6.0731e-06	0.88268	0.579424
Kcnq1ot1	1.1173e-17	-0.302684	0.201	0.341	2.21896e-13	0.717714	0.41503
Mylk	0.00316247	-0.301996	0.29	0.342	1	0.961109	0.659113
Ppp1r10	8.09208e-23	-0.301947	0.245	0.411	1.60709e-18	0.795512	0.493564
Ptpre	1.22151e-09	-0.301533	0.159	0.249	2.42593e-05	0.616283	0.314751
Iigp1	3.8382e-06	-0.301199	0.454	0.522	0.0762266	1.73871	1.43751
Rpl34-ps1	1.18663e-23	-0.300686	0.24	0.418	2.35666e-19	0.734489	0.433802
Tsc22d1	7.17077e-16	-0.300271	0.738	0.814	1.42412e-11	2.23954	1.93927
Darc	0.0134999	-0.298084	0.077	0.104	1	1.21989	0.921808
Pgm5	7.18349e-17	-0.29759	0.126	0.246	1.42664e-12	0.578012	0.280422
Sntb2	3.3732e-20	-0.297125	0.205	0.358	6.69917e-16	0.674702	0.377577
Hes1	4.72352e-14	-0.296278	0.509	0.644	9.38092e-10	1.60799	1.31172
Adm	1.79728e-07	-0.294953	0.088	0.153	0.0035694	0.554501	0.259547
Fam101b	3.09693e-05	-0.294268	0.368	0.429	0.615051	1.33366	1.03939
Errfi1	7.40309e-12	-0.293633	0.192	0.307	1.47025e-07	0.781015	0.487383
Apold1	1.38438e-16	-0.292785	0.507	0.669	2.74937e-12	1.97627	1.68349
Flna	0.0169084	-0.291407	0.317	0.361	1	0.995614	0.704207
Fosl2	8.95201e-16	-0.29042	0.37	0.525	1.77787e-11	1.20539	0.91497
Gem	9.18896e-11	-0.289914	0.2	0.307	1.82493e-06	0.842289	0.552375
Ktn1	3.28373e-25	-0.289016	0.235	0.418	6.5215e-21	0.713748	0.424732
Comt	1.00787e-23	-0.288723	0.482	0.665	2.00162e-19	1.20731	0.918584
Nedd4	2.57878e-23	-0.287776	0.571	0.725	5.12146e-19	1.34916	1.06139
Nfkbia	7.94915e-11	-0.287532	0.96	0.962	1.5787e-06	3.0623	2.77477
Prrc2c	6.23764e-21	-0.283524	0.357	0.522	1.23879e-16	0.921893	0.638369
Itgb1	1.10135e-22	-0.282552	0.784	0.873	2.18728e-18	1.82929	1.54673
Adamts1	2.01163e-12	-0.282086	0.619	0.73	3.9951e-08	1.94242	1.66034
Phldb2	2.98047e-14	-0.281581	0.226	0.351	5.91921e-10	0.708372	0.426791
Lrrfip1	4.12891e-09	-0.278768	0.355	0.454	8.20001e-05	0.920291	0.641524
Brd2	3.66148e-14	-0.277252	0.511	0.632	7.2717e-10	1.29101	1.01376
Gls	1.48331e-15	-0.276752	0.281	0.417	2.94585e-11	0.78526	0.508508
Foxc1	4.64072e-16	-0.276166	0.138	0.26	9.21647e-12	0.619293	0.343127
Fus	3.05777e-21	-0.275602	0.521	0.681	6.07272e-17	1.21865	0.943046
Tob2	1.91023e-18	-0.275479	0.244	0.396	3.79372e-14	0.74585	0.470371
Nckap5	2.27501e-11	-0.27513	0.07	0.143	4.51817e-07	0.423904	0.148774
H2-Eb1	2.14503e-07	-0.274146	0.39	0.501	0.00426003	1.47531	1.20117
Plaur	0.179082	-0.273924	0.443	0.445	1	1.43445	1.16052
Ctsh	5.692e-07	-0.273577	0.198	0.271	0.0113043	0.898289	0.624713
H2-Aa	2.69028e-05	-0.273063	0.404	0.494	0.53429	1.69242	1.41936
Itga1	3.12667e-11	-0.272864	0.29	0.406	6.20957e-07	0.85842	0.585555
Cirbp	1.40348e-21	-0.272794	0.277	0.45	2.78731e-17	0.772127	0.499333
Nppa	4.49465e-27	-0.272736	0.022	0.118	8.92637e-23	0.315766	0.0430306
Tiparp	4.93231e-10	-0.27218	0.168	0.261	9.79557e-06	0.632289	0.360109
Srrm2	6.23985e-23	-0.272061	0.618	0.757	1.23923e-18	1.43056	1.1585
Spag9	7.00222e-18	-0.271796	0.426	0.58	1.39064e-13	1.0234	0.7516
Nr4a2	1.87496e-17	-0.270876	0.083	0.191	3.72366e-13	0.461605	0.19073
F2r	1.22476e-09	-0.269446	0.191	0.287	2.43237e-05	0.783635	0.514189
Nufip2	2.8021e-17	-0.2685	0.266	0.409	5.56498e-13	0.724482	0.455982
Cxcl1	2.60204e-06	-0.268484	0.24	0.315	0.0516764	1.59921	1.33072
Fabp5	0.774063	-0.266872	0.55	0.531	1	2.51655	2.24968
Gja1	0.00214931	-0.265341	0.343	0.394	1	1.40185	1.1365
Mir703	5.1025e-20	-0.264677	0.44	0.603	1.01336e-15	1.10877	0.844088
Ankrd11	4.15058e-21	-0.262605	0.207	0.369	8.24306e-17	0.627928	0.365323
Elf1	2.15198e-14	-0.262567	0.413	0.55	4.27383e-10	1.02216	0.759595
Egr1	1.12862e-21	-0.26208	0.543	0.719	2.24144e-17	2.38358	2.1215
Rock2	1.37575e-19	-0.259024	0.318	0.489	2.73223e-15	0.858845	0.599821
Nop58	3.25059e-11	-0.258093	0.223	0.334	6.45567e-07	0.723131	0.465038
Rnf125	1.85274e-15	-0.256484	0.235	0.373	3.67955e-11	0.723339	0.466855
Irf8	8.1285e-16	-0.253912	0.157	0.283	1.61432e-11	0.620572	0.366659
Atp2b4	4.18507e-14	-0.253323	0.166	0.281	8.31156e-10	0.580875	0.327553
Morf4l1	1.59611e-23	-0.25059	0.795	0.899	3.16988e-19	1.76477	1.51418
Cd2ap	1.40002e-16	-0.249971	0.295	0.447	2.78044e-12	0.783792	0.533822
Zfp36l1	8.07408e-13	-0.249838	0.69	0.775	1.60351e-08	1.74325	1.49341
Sbno2	0.00477507	-0.249511	0.369	0.405	1	1.07517	0.825657
Pfkfb3	3.47062e-08	-0.248924	0.179	0.266	0.000689266	0.689182	0.440258
Lrrc58	2.62382e-19	-0.248392	0.56	0.719	5.2109e-15	1.29378	1.04539
Spint2	2.27811e-15	-0.248314	0.241	0.381	4.52433e-11	0.845649	0.597335
Lifr	2.48147e-11	-0.248103	0.389	0.502	4.92821e-07	0.99803	0.749927
Utrn	2.1647e-18	-0.245099	0.403	0.58	4.2991e-14	1.00773	0.762627
Tmcc3	2.96084e-05	-0.244196	0.521	0.591	0.588023	1.46363	1.21943
Slx1b	1.16774e-19	-0.243847	0.256	0.422	2.31914e-15	0.687824	0.443977
Cxcl9	0.00522363	-0.241831	0.169	0.205	1	0.917893	0.676062
Srrm1	2.02036e-15	-0.239216	0.365	0.509	4.01244e-11	0.879751	0.640535
Pbx1	1.4853e-09	-0.239105	0.206	0.302	2.9498e-05	0.715537	0.476432
Gm13889	0.00131758	-0.23889	0.175	0.225	1	0.770427	0.531537
Hhex	1.20409e-14	-0.238701	0.215	0.35	2.39132e-10	0.676089	0.437389
Irx3	8.09198e-08	-0.238355	0.118	0.193	0.00160707	0.586762	0.348407
Rpl34	2.02842e-20	-0.238297	0.219	0.382	4.02845e-16	0.616824	0.378528
Fosb	6.34168e-13	-0.237878	0.397	0.558	1.25946e-08	1.73918	1.5013
Tra2b	6.32521e-13	-0.237031	0.53	0.652	1.25619e-08	1.21806	0.981033
Trp53i11	7.15797e-07	-0.235702	0.269	0.353	0.0142157	0.868197	0.632496
Gpm6a	2.10701e-08	-0.235371	0.06	0.118	0.000418452	0.406597	0.171226
Macf1	9.80486e-15	-0.234967	0.505	0.643	1.94725e-10	1.16028	0.925315
Myc	7.81383e-06	-0.234875	0.13	0.191	0.155183	0.622985	0.38811
Lmna	0.124181	-0.234435	0.622	0.649	1	1.91866	1.68423
Pafah1b1	1.68742e-14	-0.234261	0.461	0.595	3.35121e-10	1.04034	0.806079
Hmcn1	3.06347e-06	-0.233464	0.214	0.285	0.0608406	0.870786	0.637322
Cp	4.12106e-07	-0.23337	0.101	0.165	0.00818442	0.555693	0.322323
Dstn	0.0131304	-0.233111	0.766	0.799	1	1.80668	1.57357
Eif2s3x	1.22825e-20	-0.232331	0.174	0.327	2.4393e-16	0.523134	0.290803
Nipbl	1.57778e-18	-0.23103	0.275	0.443	3.13347e-14	0.736163	0.505133
Tnrc6b	5.24994e-16	-0.229789	0.275	0.424	1.04264e-11	0.711408	0.481619
Lum	1.42601e-06	-0.229603	0.07	0.123	0.0283207	0.395432	0.165828
Wasf2	3.46249e-14	-0.228652	0.386	0.527	6.8765e-10	0.941132	0.712479
Crim1	5.29303e-13	-0.227684	0.41	0.553	1.0512e-08	1.04997	0.82229
Ccdc80	6.60425e-09	-0.226366	0.108	0.183	0.00013116	0.486839	0.260473
Nudt4	1.93154e-07	-0.22457	0.33	0.422	0.00383604	0.953025	0.728455
C130074G19Rik	2.12531e-12	-0.224085	0.216	0.333	4.22086e-08	0.623602	0.399517
Gm12216	3.97588e-05	-0.222133	0.328	0.399	0.789609	1.15579	0.933657
Aff4	5.64683e-14	-0.221177	0.238	0.372	1.12146e-09	0.635767	0.41459
Pabpn1	4.82215e-13	-0.220892	0.393	0.516	9.57679e-09	0.901087	0.680195
Smarca2	1.62705e-09	-0.220644	0.314	0.431	3.23132e-05	0.851891	0.631247
Luc7l2	2.47696e-14	-0.220069	0.396	0.536	4.91924e-10	0.909112	0.689044
Mmrn2	8.52488e-09	-0.219404	0.619	0.704	0.000169304	1.57606	1.35666
Retnla	8.417e-21	-0.21908	0.049	0.151	1.67162e-16	0.310085	0.0910052
Sorbs2	5.17376e-12	-0.218626	0.102	0.195	1.02751e-07	0.466041	0.247415
Cald1	0.00396063	-0.218573	0.454	0.51	1	1.16582	0.947249
Mbnl1	4.38567e-13	-0.218297	0.478	0.602	8.70995e-09	1.07703	0.858732
Itpr1	2.08393e-17	-0.217995	0.181	0.324	4.13868e-13	0.549486	0.331491
Oaf	2.44251e-13	-0.217241	0.069	0.153	4.85082e-09	0.375809	0.158568
Tsix	3.45541e-51	-0.215565	0.001	0.12	6.86245e-47	0.218405	0.00283999
Eif3a	2.20465e-14	-0.215245	0.479	0.612	4.37844e-10	1.07177	0.85652
Cited2	7.92138e-12	-0.215171	0.218	0.334	1.57319e-07	0.709443	0.494272
Akap2	6.2919e-08	-0.215035	0.758	0.835	0.00124957	1.81431	1.59928
Fstl1	7.88217e-18	-0.214916	0.208	0.359	1.5654e-13	0.690728	0.475812
Tmsb10	2.17963e-15	-0.214343	0.905	0.934	4.32875e-11	3.09328	2.87894
Atrx	1.59248e-11	-0.214257	0.329	0.45	3.16266e-07	0.83167	0.617413
H2-DMa	6.58893e-07	-0.21419	0.116	0.179	0.0130856	0.482215	0.268024
Filip1l	4.30153e-07	-0.213765	0.323	0.404	0.00854284	0.845748	0.631983
Erbb2ip	1.43836e-13	-0.213689	0.211	0.333	2.85658e-09	0.576463	0.362774
Ptpn14	4.57028e-16	-0.213646	0.134	0.259	9.07658e-12	0.502368	0.288722
Cflar	9.77102e-12	-0.213469	0.332	0.467	1.94052e-07	0.807321	0.593852
Arhgap29	2.33365e-09	-0.213394	0.45	0.56	4.63462e-05	1.02809	0.814696
Sertad2	1.24776e-11	-0.213392	0.31	0.44	2.47806e-07	0.774092	0.5607
Rbm25	2.61793e-14	-0.212008	0.365	0.51	5.1992e-10	0.875739	0.663731
Ebf1	1.02517e-16	-0.210529	0.135	0.261	2.03599e-12	0.466967	0.256439
Sdc4	0.000197735	-0.210142	0.139	0.19	1	0.497453	0.287311
Txnrd1	6.88053e-06	-0.209949	0.246	0.321	0.136647	0.735631	0.525682
Rps6ka2	4.13453e-08	-0.209728	0.073	0.135	0.000821117	0.348027	0.138299
Samd9l	2.3219e-12	-0.209515	0.204	0.318	4.6113e-08	0.560752	0.351237
Rasl11a	1.3006e-07	-0.209052	0.096	0.163	0.00258299	0.496339	0.287287
Map4k4	2.29983e-15	-0.209005	0.248	0.389	4.56746e-11	0.650833	0.441828
Huwe1	5.3274e-12	-0.208866	0.246	0.365	1.05802e-07	0.626756	0.417891
Azin1	1.37424e-11	-0.208716	0.284	0.411	2.72924e-07	0.85651	0.647794
Icam1	0.530783	-0.208603	0.605	0.609	1	2.14203	1.93343
Mycbp2	1.0689e-13	-0.208196	0.246	0.376	2.12284e-09	0.634055	0.425859
Mef2a	5.13383e-14	-0.207259	0.196	0.321	1.01958e-09	0.573861	0.366602
Mt1	0.574447	-0.206399	0.558	0.572	1	2.95034	2.74394
Syne1	1.92166e-07	-0.206382	0.301	0.391	0.00381642	0.784925	0.578543
Ash1l	9.24064e-15	-0.206143	0.268	0.409	1.83519e-10	0.678756	0.472612
Ptp4a2	5.97574e-13	-0.205767	0.49	0.62	1.18678e-08	1.11288	0.907117
B230120H23Rik	2.06415e-09	-0.205353	0.099	0.176	4.09941e-05	0.406792	0.201439
Gbp5	2.46725e-12	-0.204238	0.088	0.176	4.89995e-08	0.376711	0.172473
Chd1	1.71503e-15	-0.204007	0.211	0.35	3.40605e-11	0.575235	0.371228
Syne2	1.666e-13	-0.203969	0.234	0.363	3.30868e-09	0.62016	0.416191
Eif2s2	7.47188e-07	-0.203838	0.642	0.708	0.0148392	1.41186	1.20802
Mgp	0.825051	-0.203558	0.47	0.448	1	2.78602	2.58246
Rassf3	1.22945e-12	-0.203542	0.302	0.43	2.4417e-08	0.761132	0.55759
Baz2b	1.30376e-12	-0.203432	0.208	0.326	2.58926e-08	0.571477	0.368045
Fscn1	1.01745e-07	-0.202981	0.305	0.406	0.00202066	0.904085	0.701104
Nedd9	6.98341e-07	-0.20279	0.359	0.441	0.0138691	0.86941	0.666619
Plxnd1	7.75363e-13	-0.202151	0.297	0.425	1.53987e-08	0.776286	0.574135
Fbln2	6.55783e-06	-0.201663	0.304	0.381	0.130239	1.10614	0.904481
Bclaf1	5.2443e-13	-0.201129	0.287	0.421	1.04152e-08	0.699549	0.49842
Mll5	1.92502e-12	-0.200712	0.468	0.59	3.82308e-08	1.03395	0.833234
Prpf4b	5.52849e-11	-0.200221	0.27	0.389	1.09796e-06	0.696444	0.496223
Rnaset2b	9.70133e-14	-0.200026	0.278	0.418	1.92668e-09	0.685225	0.4852
Zeb1	4.03371e-14	-0.199784	0.208	0.337	8.01095e-10	0.561215	0.361431
Arglu1	3.71749e-11	-0.199528	0.377	0.51	7.38293e-07	0.926287	0.726759
BC028528	0.305512	-0.199403	0.416	0.427	1	1.25162	1.05222
Nes	2.06597e-06	-0.199193	0.289	0.374	0.0410302	0.786824	0.587631
Akap11	2.39237e-16	-0.199161	0.116	0.234	4.75124e-12	0.404638	0.205477
Wdr89	7.34077e-16	-0.199129	0.419	0.585	1.45788e-11	1.07302	0.873896
Rrbp1	7.40223e-13	-0.1991	0.557	0.682	1.47008e-08	1.24598	1.04688
Sepw1	1.51141e-13	-0.198533	0.899	0.932	3.00166e-09	2.31057	2.11204
Slc39a1	2.73817e-05	-0.198385	0.322	0.406	0.543801	0.891349	0.692964
Gas6	1.744e-09	-0.198334	0.453	0.567	3.46359e-05	1.30118	1.10285
Iqgap1	2.5838e-09	-0.19722	0.495	0.586	5.13142e-05	1.07652	0.879295
Ppp1r12a	5.03458e-08	-0.19717	0.315	0.412	0.000999868	0.750718	0.553547
Lrrc32	3.15283e-09	-0.196959	0.409	0.515	6.26153e-05	1.13981	0.94285
Actn4	1.34636e-12	-0.196363	0.688	0.781	2.67388e-08	1.52768	1.33132
Col8a1	5.06211e-08	-0.196162	0.057	0.114	0.00100534	0.348353	0.152191
Zcchc6	1.03188e-12	-0.195848	0.247	0.369	2.04931e-08	0.629203	0.433355
Lrrc8a	1.67366e-05	-0.195504	0.568	0.649	0.33239	1.4054	1.2099
Cbx3	5.55987e-11	-0.195479	0.349	0.473	1.10419e-06	0.84658	0.651101
Ripk2	5.94074e-12	-0.195441	0.05	0.121	1.17983e-07	0.29648	0.101039
Ctgf	4.40004e-07	-0.195003	0.061	0.116	0.00873849	0.408018	0.213015
Actb	0.0046616	-0.194915	0.995	0.998	1	3.87093	3.67602
Cdh13	6.26275e-10	-0.194662	0.193	0.295	1.24378e-05	0.619491	0.424829
Top1	2.42189e-10	-0.194351	0.579	0.689	4.80987e-06	1.29886	1.10451
Tspan2	4.55331e-12	-0.194144	0.202	0.32	9.04288e-08	0.581933	0.38779
Srsf5	6.33159e-14	-0.193814	0.826	0.89	1.25745e-09	1.82514	1.63133
Gcc2	3.41027e-05	-0.193415	0.206	0.272	0.67728	0.59519	0.401775
Pcm1	9.41399e-11	-0.193329	0.205	0.311	1.86962e-06	0.53596	0.342632
Set	2.79038e-10	-0.193238	0.459	0.579	5.5417e-06	1.02794	0.834704
Dst	1.63571e-09	-0.193076	0.452	0.559	3.24851e-05	1.04711	0.854033
Aplp2	9.65212e-10	-0.192979	0.898	0.931	1.91691e-05	2.18937	1.99639
Etnk1	8.70449e-13	-0.192041	0.223	0.344	1.72871e-08	0.583752	0.39171
Pbrm1	2.49708e-11	-0.191982	0.289	0.409	4.9592e-07	0.6892	0.497219
Calm2	2.5672e-11	-0.191672	0.897	0.928	5.09846e-07	2.12882	1.93715
Ncl	1.36148e-09	-0.191279	0.616	0.725	2.70389e-05	1.3497	1.15842
Rdx	0.00320285	-0.190487	0.694	0.728	1	1.69632	1.50583
Rab8b	5.0717e-10	-0.190256	0.176	0.27	1.00724e-05	0.495301	0.305045
Sash1	1.24564e-09	-0.189808	0.336	0.454	2.47384e-05	0.798825	0.609017
Fcgrt	1.75817e-05	-0.189497	0.444	0.511	0.349173	1.03214	0.842646
Limch1	5.71756e-14	-0.188462	0.206	0.337	1.13551e-09	0.659702	0.47124
Tnfaip3	9.81489e-05	-0.188038	0.152	0.207	1	0.563528	0.37549
Smarca5	5.77257e-14	-0.187835	0.259	0.398	1.14643e-09	0.641727	0.453892
Epn2	5.01248e-10	-0.187583	0.282	0.393	9.95479e-06	0.702836	0.515253
Birc6	1.46077e-12	-0.187347	0.178	0.293	2.9011e-08	0.5052	0.317852
Rnf144a	9.75556e-07	-0.186223	0.298	0.389	0.0193745	0.803874	0.617651
Arhgap5	1.49645e-11	-0.18596	0.184	0.293	2.97194e-07	0.53555	0.34959
Uap1	0.00504992	-0.184778	0.379	0.431	1	1.11997	0.935188
Clic4	0.585323	-0.184085	0.87	0.847	1	2.20836	2.02427
Fam63b	3.78283e-10	-0.183828	0.27	0.382	7.51271e-06	0.655615	0.471787
Stc1	2.4301e-05	-0.183461	0.104	0.159	0.482618	0.531432	0.34797
Rrad	6.50495e-07	-0.183411	0.071	0.127	0.0129188	0.418788	0.235377
Ets1	1.84764e-08	-0.183315	0.638	0.732	0.000366941	1.45111	1.2678
Tjp2	1.54483e-11	-0.183245	0.23	0.351	3.06803e-07	0.618578	0.435333
Mbnl2	6.404e-12	-0.182973	0.612	0.723	1.27183e-07	1.30429	1.12132
Tgfbr3	2.46953e-09	-0.182916	0.255	0.354	4.90448e-05	0.638153	0.455237
Purb	2.57191e-11	-0.182721	0.312	0.441	5.10782e-07	0.765128	0.582407
Nfe2l1	2.49331e-12	-0.182625	0.423	0.567	4.95171e-08	0.973104	0.790478
Itga5	4.26211e-08	-0.182289	0.258	0.352	0.000846456	0.686649	0.504359
Lpp	3.13336e-11	-0.18216	0.157	0.262	6.22286e-07	0.476671	0.294511
Ddx6	4.70206e-13	-0.180745	0.341	0.482	9.33829e-09	0.782663	0.601918
Smchd1	3.61115e-12	-0.180381	0.185	0.298	7.17174e-08	0.496295	0.315914
Pdcd4	8.30879e-11	-0.179914	0.166	0.268	1.65013e-06	0.482217	0.302303
Kank1	3.53558e-13	-0.179672	0.074	0.161	7.02167e-09	0.348964	0.169292
Pkn2	1.75582e-10	-0.179618	0.308	0.43	3.48705e-06	0.7221	0.542482
Tgtp2	2.81125e-12	-0.179214	0.078	0.162	5.58315e-08	0.331106	0.151892
Pbxip1	8.8979e-05	-0.179195	0.222	0.286	1	0.562022	0.382827
Pde4b	1.45745e-05	-0.178993	0.536	0.623	0.289449	1.42569	1.2467
Nr2f2	3.07349e-08	-0.178892	0.173	0.26	0.000610395	0.581484	0.402592
Nsa2	8.17606e-11	-0.178876	0.375	0.497	1.62377e-06	0.848967	0.670091
Eif5b	2.21712e-10	-0.178842	0.42	0.545	4.4032e-06	0.976372	0.79753
Acin1	1.71191e-11	-0.178438	0.302	0.428	3.39986e-07	0.702605	0.524168
Prdm2	8.60148e-13	-0.178103	0.177	0.293	1.70825e-08	0.48912	0.311016
Eea1	1.21081e-13	-0.177983	0.191	0.319	2.40467e-09	0.536474	0.358492
Rcn3	3.55593e-09	-0.177669	0.122	0.205	7.06208e-05	0.438786	0.261117
H2-DMb1	0.00044451	-0.177563	0.219	0.275	1	0.736626	0.559062
Bbx	1.28507e-13	-0.177451	0.165	0.283	2.55214e-09	0.466749	0.289298
Amotl1	3.49191e-09	-0.177375	0.317	0.427	6.93494e-05	0.762413	0.585038
Bcl6b	6.96187e-10	-0.177352	0.265	0.379	1.38263e-05	0.737751	0.5604
Foxn3	1.49301e-13	-0.177303	0.255	0.394	2.96513e-09	0.639813	0.46251
Ppp1r14a	2.42728e-05	-0.177085	0.092	0.143	0.482059	0.440068	0.262983
Sh3bgrl	1.37174e-08	-0.176996	0.488	0.599	0.000272427	1.06144	0.884443
Zcchc7	2.24057e-13	-0.176863	0.145	0.258	4.44977e-09	0.43596	0.259097
Meox2	8.39401e-07	-0.176815	0.235	0.316	0.0166705	0.736822	0.560006
Nr3c1	3.4215e-08	-0.176478	0.429	0.525	0.00067951	0.95672	0.780242
Gata6	3.30733e-12	-0.176339	0.08	0.165	6.56836e-08	0.351026	0.174687
Ppp3ca	1.58833e-09	-0.176296	0.371	0.486	3.15443e-05	0.839215	0.66292
Itih5	5.14337e-15	-0.175773	0.04	0.117	1.02147e-10	0.267293	0.0915208
Ythdc1	1.2437e-09	-0.175723	0.273	0.38	2.46998e-05	0.649933	0.47421
Wwtr1	2.22157e-08	-0.17554	0.452	0.557	0.000441203	1.01019	0.834646
Aplnr	1.44438e-05	-0.17542	0.189	0.256	0.286854	0.719374	0.543954
Nrarp	4.46815e-06	-0.175081	0.288	0.364	0.0887375	0.828965	0.653884
Tcf7l2	8.20095e-14	-0.174877	0.151	0.269	1.62871e-09	0.441528	0.266651
Eif4g3	4.05903e-12	-0.174859	0.249	0.374	8.06123e-08	0.605837	0.430979
Lmo4	2.73264e-08	-0.174845	0.268	0.363	0.000542702	0.681532	0.506686
Net1	3.42595e-16	-0.174229	0.083	0.19	6.80393e-12	0.343331	0.169102
Chka	1.14083e-09	-0.174159	0.149	0.24	2.26569e-05	0.479515	0.305357
Zc3h13	2.83996e-14	-0.173486	0.176	0.3	5.64015e-10	0.498101	0.324615
Hp1bp3	5.35373e-10	-0.173115	0.322	0.446	1.06325e-05	0.751847	0.578732
Plk2	7.87653e-05	-0.173041	0.578	0.639	1	1.63263	1.45959
Mast4	2.68042e-08	-0.172859	0.184	0.272	0.000532331	0.521385	0.348526
Hmgn1	7.93013e-08	-0.172749	0.486	0.579	0.00157492	1.03583	0.863085
Phlda1	1.99112e-07	-0.172629	0.217	0.307	0.00395437	0.844415	0.671786
Rpl37	1.11511e-17	-0.172581	0.997	0.998	2.21461e-13	3.38869	3.21611
6820431F20Rik	2.08693e-08	-0.17253	0.329	0.431	0.000414465	0.741624	0.569093
Klf3	5.18077e-07	-0.172516	0.347	0.441	0.010289	0.831265	0.658749
Adam10	8.29225e-10	-0.172175	0.315	0.426	1.64684e-05	0.706597	0.534422
Phactr2	3.23722e-08	-0.172124	0.339	0.441	0.000642913	0.792475	0.620351
Pcmtd1	1.49239e-09	-0.171229	0.352	0.469	2.96389e-05	0.813368	0.642138
Bach1	3.51848e-08	-0.171099	0.149	0.229	0.000698771	0.442648	0.271549
Rsrc2	2.20921e-10	-0.171065	0.459	0.58	4.38749e-06	1.01446	0.843395
Pim1	0.000299372	-0.170675	0.222	0.273	1	0.603695	0.433021
Igf2r	5.86314e-13	-0.170497	0.145	0.256	1.16442e-08	0.449385	0.278888
Tpst1	0.000109847	-0.170404	0.236	0.3	1	0.681901	0.511498
Cnot4	4.9616e-10	-0.170212	0.217	0.324	9.85374e-06	0.550342	0.38013
Foxc2	1.22824e-16	-0.169848	0.028	0.101	2.43929e-12	0.225127	0.0552787
H2-T23	7.1086e-06	-0.169185	0.572	0.647	0.141177	1.27201	1.10282
Pcf11	2.5291e-11	-0.169178	0.205	0.32	5.0228e-07	0.552257	0.383079
Myo6	4.81433e-09	-0.169112	0.196	0.293	9.56126e-05	0.527617	0.358505
Ralb	1.33899e-06	-0.169045	0.475	0.562	0.0265923	1.02297	0.853924
Bmx	2.43028e-07	-0.169032	0.077	0.136	0.00482653	0.351969	0.182937
Fli1	9.41358e-08	-0.168969	0.476	0.573	0.00186954	1.12121	0.952236
Exoc6	4.25845e-11	-0.168738	0.148	0.249	8.45727e-07	0.430974	0.262236
Tcf4	6.72513e-11	-0.168205	0.758	0.837	1.33561e-06	1.7694	1.6012
Apc	1.16165e-10	-0.168135	0.197	0.305	2.30704e-06	0.504558	0.336424
Cbx1	1.75113e-13	-0.168104	0.116	0.22	3.47774e-09	0.370986	0.202882
Pvr	8.99744e-09	-0.167965	0.137	0.222	0.000178689	0.454455	0.28649
Scd1	9.23433e-06	-0.167781	0.112	0.169	0.183394	0.407155	0.239375
Fam198b	4.46219e-07	-0.167485	0.25	0.338	0.00886192	0.65398	0.486495
Tmem158	2.58922e-05	-0.167371	0.089	0.139	0.514219	0.404756	0.237385
Myh9	1.07141e-07	-0.16734	0.461	0.566	0.00212782	1.04644	0.879099
Gadd45b	4.49574e-06	-0.167331	0.353	0.436	0.0892854	1.27645	1.10912
Cyyr1	2.1487e-07	-0.167232	0.218	0.303	0.00426731	0.587504	0.420272
Kif5b	6.32805e-10	-0.166817	0.592	0.693	1.25675e-05	1.25483	1.08801
Hdgfrp3	4.41486e-15	-0.166539	0.154	0.281	8.76791e-11	0.437538	0.270999
Pdlim3	1.0396e-11	-0.166216	0.056	0.129	2.06464e-07	0.318433	0.152217
Zfp46	0.0359028	-0.166198	0.165	0.193	1	0.647352	0.481154
Uaca	2.16087e-07	-0.165928	0.331	0.432	0.00429148	0.846095	0.680168
Fryl	1.19449e-10	-0.16589	0.253	0.374	2.37226e-06	0.6493	0.48341
Mier1	2.65893e-08	-0.165818	0.289	0.384	0.000528063	0.660559	0.494741
Rbm39	3.30383e-11	-0.165698	0.721	0.806	6.5614e-07	1.5189	1.3532
Bhlhe40	1.07222e-05	-0.165473	0.278	0.356	0.212943	0.931748	0.766275
Meis2	5.83977e-06	-0.165436	0.143	0.208	0.115978	0.515543	0.350106
Golim4	9.78351e-11	-0.165081	0.161	0.262	1.943e-06	0.444334	0.279253
Mapk6	2.33021e-06	-0.164722	0.122	0.184	0.0462779	0.381616	0.216894
Sfr1	1.20434e-08	-0.16463	0.521	0.619	0.000239182	1.09366	0.929032
Rpl22l1	6.40434e-11	-0.164621	0.794	0.854	1.2719e-06	1.85772	1.6931
Nupr1	0.239007	-0.16461	0.136	0.153	1	0.551389	0.386779
Cdv3	5.38454e-09	-0.164515	0.324	0.437	0.000106937	0.734227	0.569711
Cdk12	1.36269e-10	-0.164425	0.221	0.334	2.70631e-06	0.569456	0.405031
Gm1673	4.20434e-08	-0.164171	0.123	0.199	0.000834982	0.433618	0.269447
Serpine1	0.0503607	-0.163988	0.135	0.107	1	0.587311	0.423324
Ppp2r2a	6.59878e-11	-0.16392	0.324	0.457	1.31052e-06	0.718061	0.554142
Snrk	2.42948e-06	-0.163507	0.671	0.718	0.0482494	1.57052	1.40701
Ccl5	9.67262e-15	-0.163045	0.073	0.167	1.92098e-10	0.549949	0.386904
Atp5k	3.00975e-08	-0.162846	0.575	0.675	0.000597736	1.2364	1.07356
Kdm6a	1.77122e-16	-0.162538	0.075	0.176	3.51764e-12	0.288266	0.125728
Nfat5	4.10853e-08	-0.162445	0.215	0.311	0.000815955	0.554611	0.392166
Kdr	8.50621e-07	-0.162306	0.398	0.504	0.0168933	1.08836	0.926051
Ttc3	2.09801e-10	-0.162056	0.19	0.296	4.16666e-06	0.498501	0.336445
Yes1	1.64867e-08	-0.161969	0.168	0.257	0.000327426	0.470117	0.308148
Rpl35	2.19772e-17	-0.161659	0.997	0.997	4.36467e-13	3.29784	3.13618
Hip1	1.74533e-09	-0.161603	0.282	0.391	3.46622e-05	0.653811	0.492207
Fam38a	3.73791e-08	-0.161459	0.303	0.408	0.000742349	0.711245	0.549786
Rapgef5	9.09065e-13	-0.161323	0.104	0.201	1.8054e-08	0.356819	0.195496
Cggbp1	5.00994e-08	-0.161238	0.326	0.424	0.000994974	0.721956	0.560718
Thrap3	3.19433e-10	-0.161101	0.264	0.377	6.34393e-06	0.607641	0.44654
Arih1	3.60109e-08	-0.159799	0.199	0.288	0.000715177	0.495234	0.335434
Crem	9.20615e-05	-0.15968	0.25	0.313	1	0.61409	0.454411
Hist1h1e	2.99485e-08	-0.159398	0.082	0.149	0.000594777	0.313583	0.154185
2410006H16Rik	5.73015e-07	-0.159078	0.487	0.575	0.0113801	1.10031	0.941233
Pi16	0.000362863	-0.158788	0.124	0.17	1	0.5177	0.358911
Gltscr2	2.79037e-11	-0.15858	0.761	0.825	5.54168e-07	1.62993	1.47135
Smad1	1.01309e-07	-0.158371	0.281	0.379	0.002012	0.687667	0.529296
Ehbp1l1	7.79395e-09	-0.15829	0.192	0.288	0.000154788	0.489629	0.331338
Npm1	5.69227e-08	-0.158234	0.73	0.779	0.00113049	1.5587	1.40046
Mafk	8.00357e-08	-0.158199	0.3	0.4	0.00158951	0.746334	0.588135
Ppp1cc	7.29455e-06	-0.157813	0.507	0.592	0.14487	1.0601	0.902283
Gbp4	3.8183e-05	-0.157595	0.247	0.317	0.758314	0.668582	0.510987
Syncrip	6.71242e-10	-0.156978	0.214	0.32	1.33309e-05	0.517645	0.360668
Vcl	1.2477e-05	-0.156529	0.319	0.4	0.247793	0.774253	0.617723
Tgoln1	3.42524e-06	-0.156488	0.438	0.531	0.0680252	0.967254	0.810765
Tra2a	2.39616e-09	-0.156449	0.266	0.375	4.75877e-05	0.615526	0.459077
Supt16h	4.50324e-11	-0.155778	0.148	0.249	8.94343e-07	0.428404	0.272626
Stag2	2.00177e-08	-0.15553	0.208	0.298	0.000397552	0.506954	0.351424
Sat1	3.63752e-05	-0.155431	0.719	0.788	0.722411	1.97794	1.82251
Smtn	1.80711e-08	-0.155397	0.207	0.307	0.000358893	0.555379	0.399982
Gcap14	6.20479e-09	-0.155	0.417	0.528	0.000123227	0.897673	0.742673
Scaf11	3.72681e-08	-0.154999	0.281	0.38	0.000740145	0.644201	0.489203
Ddx21	2.81703e-07	-0.154885	0.238	0.326	0.00559462	0.572671	0.417786
4932438A13Rik	1.8887e-14	-0.154799	0.109	0.218	3.75096e-10	0.351382	0.196582
Oat	4.08944e-08	-0.154743	0.322	0.429	0.000812162	0.783388	0.628645
B4galt1	2.33532e-06	-0.154615	0.234	0.317	0.0463794	0.57969	0.425075
Arhgap18	1.28213e-06	-0.154517	0.188	0.265	0.025463	0.520619	0.366103
Pura	7.6165e-11	-0.154452	0.218	0.333	1.51264e-06	0.549745	0.395293
Ecm2	9.64754e-15	-0.154423	0.089	0.192	1.916e-10	0.338164	0.183742
Neurl3	2.44098e-07	-0.153976	0.141	0.217	0.00484778	0.462599	0.308623
Akap9	5.31859e-08	-0.153152	0.25	0.346	0.00105627	0.611186	0.458034
Vezf1	1.18819e-07	-0.153067	0.278	0.377	0.00235975	0.63763	0.484563
Dab2	7.29944e-09	-0.152958	0.18	0.273	0.000144967	0.481298	0.32834
Bptf	1.30546e-08	-0.152883	0.311	0.421	0.000259264	0.691532	0.538649
Ccdc82	1.34894e-10	-0.152839	0.124	0.216	2.67899e-06	0.365891	0.213053
Ccrn4l	0.0129564	-0.152817	0.24	0.277	1	0.861646	0.70883
Lgals1	0.0024148	-0.152805	0.36	0.424	1	1.14666	0.993858
Tjp1	2.8113e-05	-0.152798	0.467	0.546	0.558325	1.00439	0.851588
Enpp6	1.24795e-12	-0.152385	0.045	0.117	2.47843e-08	0.256594	0.104208
Pdia5	0.0125842	-0.151648	0.161	0.194	1	0.472287	0.320639
Canx	7.831e-08	-0.151426	0.56	0.667	0.00155524	1.12428	0.972853
Lepr	4.168e-08	-0.151181	0.082	0.146	0.000827765	0.314599	0.163418
Diap1	2.7041e-08	-0.151077	0.108	0.18	0.000537033	0.338162	0.187084
Hmgn3	3.62848e-12	-0.151004	0.115	0.213	7.20617e-08	0.37026	0.219256
Rbm26	2.21933e-08	-0.150984	0.213	0.31	0.000440758	0.539336	0.388352
Dip2b	4.79574e-10	-0.150596	0.141	0.234	9.52435e-06	0.391483	0.240887
Mkl2	3.32762e-07	-0.150369	0.317	0.42	0.00660865	0.741542	0.591173
Pik3c2a	1.00453e-10	-0.150322	0.133	0.227	1.99499e-06	0.379021	0.228698
Cdk13	4.60476e-11	-0.150051	0.12	0.212	9.14505e-07	0.336503	0.186451
Pak2	3.84007e-09	-0.14996	0.353	0.476	7.62639e-05	0.762425	0.612466
Myof	2.21662e-10	-0.149624	0.065	0.136	4.40221e-06	0.2778	0.128175
Fmo2	1.27656e-08	-0.149477	0.184	0.278	0.000253525	0.537562	0.388085
Tnfsf10	6.48174e-05	-0.14936	0.324	0.395	1	0.791358	0.641998
Ddx17	2.18976e-09	-0.149308	0.376	0.502	4.34886e-05	0.82659	0.677282
Snhg9	2.35939e-11	-0.149054	0.113	0.205	4.68575e-07	0.356463	0.207409
Map2k3	0.0314851	-0.148954	0.387	0.42	1	0.87779	0.728836
4933407C03Rik	0.0137739	-0.148945	0.445	0.482	1	1.0148	0.865851
Ptpn12	4.72176e-06	-0.148853	0.309	0.392	0.0937741	0.696259	0.547406
Chd2	6.49746e-11	-0.14853	0.105	0.193	1.2904e-06	0.335675	0.187145
Rfk	1.09231e-08	-0.148429	0.264	0.369	0.000216933	0.653625	0.505196
Ralgds	6.25974e-05	-0.148343	0.211	0.281	1	0.583866	0.435523
Nus1	8.05569e-06	-0.148215	0.366	0.461	0.159986	0.861562	0.713347
Tubb6	0.0357858	-0.147976	0.206	0.235	1	0.754916	0.60694
Sf3b1	3.74455e-08	-0.147851	0.57	0.675	0.000743668	1.1743	1.02645
Rpl38	5.19043e-15	-0.14775	0.99	0.993	1.03082e-10	3.00997	2.86222
D0H4S114	1.62402e-10	-0.147749	0.077	0.154	3.22531e-06	0.270815	0.123067
Gch1	0.000622522	-0.147704	0.332	0.39	1	0.812974	0.66527
Larp4	1.71384e-11	-0.147539	0.103	0.193	3.40369e-07	0.319815	0.172275
Plec	1.4745e-05	-0.147434	0.457	0.546	0.292835	1.0429	0.895469
D830031N03Rik	7.44027e-11	-0.147417	0.066	0.139	1.47764e-06	0.270449	0.123032
Usp34	7.93225e-09	-0.147309	0.235	0.338	0.000157535	0.571736	0.424427
Wdr26	4.65959e-08	-0.147286	0.304	0.413	0.000925395	0.674198	0.526912
Ndst1	7.18921e-10	-0.147175	0.115	0.201	1.42778e-05	0.358465	0.21129
Hnrnpd	2.92215e-09	-0.147104	0.356	0.473	5.80339e-05	0.769716	0.622611
Myst3	7.57268e-08	-0.146543	0.168	0.251	0.00150393	0.429497	0.282954
Rpl4	1.73027e-14	-0.146502	0.973	0.978	3.43632e-10	2.66209	2.51558
Taok1	1.32647e-07	-0.146102	0.285	0.39	0.00263436	0.64463	0.498528
Asap2	4.4774e-08	-0.14604	0.239	0.337	0.000889211	0.616246	0.470206
Irgm1	0.0227525	-0.145852	0.352	0.392	1	0.936947	0.791095
Zdhhc20	1.35623e-07	-0.145742	0.289	0.388	0.00269347	0.641551	0.495809
Sh3bp5	6.71215e-06	-0.145363	0.416	0.507	0.133303	0.98266	0.837297
Msrb3	2.77703e-09	-0.145161	0.148	0.238	5.51519e-05	0.39668	0.251519
Csnk2a1	2.03588e-08	-0.144986	0.406	0.522	0.000404325	0.856341	0.711355
Tcf25	1.10664e-07	-0.144954	0.503	0.603	0.00219779	1.03136	0.886402
Hexim1	5.40704e-06	-0.14485	0.276	0.356	0.107384	0.728526	0.583676
Flt1	2.01986e-05	-0.144834	0.629	0.709	0.401145	1.42045	1.27561
Rpl13	2.02089e-16	-0.144449	0.998	0.999	4.01349e-12	3.5871	3.44265
Brd4	5.05002e-09	-0.144334	0.252	0.358	0.000100293	0.58783	0.443496
Prpf38b	5.12344e-07	-0.144316	0.252	0.343	0.0101752	0.573769	0.429453
Tns1	6.03475e-05	-0.143946	0.534	0.609	1	1.25865	1.11471
She	3.96115e-07	-0.143802	0.335	0.428	0.00786685	0.75071	0.606908
Rapgef6	1.0276e-08	-0.143738	0.157	0.243	0.00020408	0.412086	0.268348
Gbp2	0.00144804	-0.14371	0.453	0.525	1	1.11162	0.967906
Arrdc4	4.73693e-07	-0.143574	0.192	0.275	0.00940755	0.518597	0.375023
Mgst1	1.9863e-05	-0.143422	0.327	0.41	0.394479	0.903868	0.760446
Eif5	6.40103e-06	-0.143347	0.623	0.687	0.127124	1.29759	1.15425
Tmem47	2.37062e-08	-0.143267	0.196	0.29	0.000470805	0.495415	0.352148
Stag1	7.04106e-08	-0.143224	0.18	0.264	0.00139835	0.442099	0.298874
Itsn2	9.60181e-07	-0.142937	0.202	0.279	0.0190692	0.481498	0.338561
Selm	0.000131661	-0.142879	0.563	0.621	1	1.30636	1.16349
Ppp2r5a	3.10402e-06	-0.142871	0.454	0.547	0.0616458	0.976665	0.833794
Prex2	3.54713e-08	-0.142855	0.324	0.433	0.00070446	0.750366	0.607511
Rps29	5.89343e-17	-0.142234	1	0.999	1.17043e-12	3.97857	3.83633
Zfr	3.22408e-08	-0.142135	0.228	0.325	0.000640303	0.54928	0.407145
Arid4b	1.51445e-07	-0.142118	0.237	0.33	0.00300769	0.561549	0.419431
Pcbp2	2.7786e-08	-0.141903	0.79	0.857	0.000551829	1.67884	1.53694
Zbed6	1.81789e-09	-0.141849	0.058	0.122	3.61032e-05	0.243404	0.101555
Nhsl2	1.2095e-11	-0.141773	0.113	0.208	2.40206e-07	0.344878	0.203106
Nrp2	3.46514e-07	-0.141737	0.214	0.301	0.00688176	0.592469	0.450732
Zfp644	1.33752e-12	-0.141607	0.123	0.226	2.65632e-08	0.347875	0.206268
Golga4	2.29259e-09	-0.141547	0.203	0.307	4.55308e-05	0.492402	0.350855
Tacc1	5.46564e-07	-0.141419	0.318	0.416	0.0108548	0.700163	0.558744
Zc3h11a	1.18852e-06	-0.141342	0.34	0.437	0.023604	0.72125	0.579908
Tor1aip1	6.90391e-07	-0.141333	0.419	0.518	0.0137112	0.879996	0.738663
Maml2	4.16352e-11	-0.14114	0.12	0.214	8.26875e-07	0.338805	0.197666
Rock1	2.31765e-07	-0.140877	0.402	0.501	0.00460285	0.865813	0.724936
Gpbp1	3.4399e-07	-0.140677	0.28	0.376	0.00683164	0.6221	0.481423
Tpr	1.94506e-05	-0.140462	0.397	0.482	0.38629	0.84967	0.709208
Fxyd1	0.0977149	-0.140432	0.088	0.106	1	0.387041	0.246609
Ranbp2	2.46866e-10	-0.140422	0.096	0.176	4.90276e-06	0.294476	0.154053
Sept2	3.43877e-06	-0.140373	0.494	0.58	0.068294	1.02114	0.880766
Srsf11	6.31979e-07	-0.140359	0.389	0.487	0.0125511	0.807838	0.667479
Nos3	8.1613e-08	-0.140219	0.29	0.393	0.00162083	0.739187	0.598968
Trip11	2.75467e-08	-0.1398	0.116	0.193	0.000547077	0.354987	0.215187
Ltbp1	4.19515e-06	-0.139771	0.125	0.189	0.0833156	0.379571	0.239801
Myadm	4.60928e-06	-0.139649	0.451	0.54	0.0915402	1.06079	0.92114
Mtap1b	9.48465e-07	-0.139279	0.127	0.195	0.0188365	0.405502	0.266222
Prr7	1.78779e-08	-0.139089	0.08	0.148	0.000355055	0.294747	0.155658
Ppp2r3a	7.58059e-14	-0.139087	0.077	0.169	1.5055e-09	0.277148	0.138061
Ap2b1	1.06023e-07	-0.138965	0.229	0.322	0.00210561	0.534946	0.395981
Fcho2	5.48032e-07	-0.138565	0.261	0.354	0.0108839	0.592062	0.453498
Zfml	2.77138e-08	-0.138553	0.147	0.229	0.000550396	0.386615	0.248063
Ttc28	2.10799e-07	-0.138265	0.276	0.37	0.00418646	0.62412	0.485856
Gtpbp4	8.06249e-10	-0.138081	0.209	0.318	1.60121e-05	0.50015	0.362069
Igfbp4	7.43548e-06	-0.137971	0.479	0.559	0.147669	1.6793	1.54133
Peli1	1.14475e-07	-0.137911	0.274	0.369	0.00227346	0.631464	0.493553
Spon1	2.25489e-10	-0.137421	0.044	0.105	4.47821e-06	0.256398	0.118978
Shb	2.78062e-05	-0.1373	0.101	0.153	0.552231	0.323027	0.185727
Zbtb20	7.4635e-09	-0.137247	0.254	0.362	0.000148225	0.580538	0.443291
Cebpb	0.00311309	-0.136911	0.492	0.561	1	1.7148	1.57788
Tes	4.65139e-06	-0.136769	0.131	0.195	0.0923766	0.392831	0.256063
D14Abb1e	2.53e-08	-0.136766	0.153	0.238	0.000502457	0.407693	0.270927
Mtss1	1.7238e-09	-0.136647	0.172	0.27	3.42347e-05	0.468901	0.332254
Herc1	1.99066e-10	-0.136615	0.176	0.284	3.95345e-06	0.44184	0.305224
Upf2	3.60967e-09	-0.136438	0.144	0.232	7.16881e-05	0.375912	0.239473
Rps5	1.78275e-12	-0.136341	0.994	0.997	3.54055e-08	3.21138	3.07504
Dnm3	2.03926e-09	-0.136221	0.069	0.137	4.04997e-05	0.276435	0.140214
Tgif1	8.94174e-05	-0.136194	0.185	0.25	1	0.598022	0.461828
Per1	1.44683e-07	-0.136173	0.217	0.311	0.0028734	0.515452	0.379279
Midn	0.00678747	-0.136067	0.523	0.561	1	1.15368	1.01761
Ccdc50	3.17074e-09	-0.135918	0.194	0.295	6.2971e-05	0.471146	0.335228
Btbd7	6.33158e-12	-0.135915	0.072	0.153	1.25745e-07	0.259257	0.123342
Swap70	1.04242e-05	-0.135737	0.302	0.388	0.207025	0.700747	0.56501
Procr	3.57934e-10	-0.135478	0.164	0.267	7.10857e-06	0.941724	0.806245
Mecom	2.05858e-08	-0.135409	0.1	0.173	0.000408834	0.328469	0.193061
Fam174b	2.56587e-05	-0.135301	0.123	0.18	0.509581	0.428667	0.293366
Tm9sf3	1.31101e-06	-0.134987	0.508	0.607	0.0260366	1.02302	0.888032
Rel	8.82584e-10	-0.134852	0.05	0.111	1.75281e-05	0.22979	0.0949375
Thra	1.39608e-07	-0.134755	0.164	0.249	0.00277261	0.433385	0.29863
Hmgb1	2.33716e-09	-0.134692	0.918	0.946	4.64159e-05	2.13721	2.00251
Srsf7	7.83363e-06	-0.134457	0.623	0.697	0.155576	1.32581	1.19135
Tm4sf1	0.000284475	-0.13442	0.935	0.957	1	3.40789	3.27347
Cntln	1.05715e-12	-0.134359	0.08	0.168	2.0995e-08	0.27696	0.142601
H2-K1	5.69017e-08	-0.134278	0.986	0.983	0.00113007	3.13224	2.99796
Kctd12b	3.46573e-06	-0.134254	0.102	0.163	0.0688294	0.359903	0.225649
Btg2	6.40641e-08	-0.13424	0.802	0.852	0.00127231	2.46598	2.33174
Herc2	1.07584e-09	-0.134206	0.2	0.305	2.13662e-05	0.494077	0.359871
Luc7l3	8.46011e-06	-0.134089	0.323	0.411	0.168018	0.707045	0.572956
Zc3h12a	3.67909e-05	-0.133979	0.179	0.245	0.730668	0.525732	0.391753
Tpm3	0.000106757	-0.133902	0.858	0.89	1	1.91891	1.78501
Thsd7a	2.04438e-09	-0.133808	0.054	0.116	4.06014e-05	0.232376	0.0985683
Gm9766	4.05234e-07	-0.133774	0.084	0.144	0.00804795	0.290536	0.156761
Thbs1	0.00310184	-0.133555	0.167	0.212	1	0.743119	0.609565
Epha4	4.30082e-09	-0.133429	0.13	0.218	8.54142e-05	0.411438	0.278009
Chchd10	0.0397523	-0.133356	0.162	0.195	1	0.588685	0.455329
Plcb1	5.36619e-07	-0.133264	0.162	0.24	0.0106573	0.429144	0.29588
Sdpr	2.79736e-05	-0.132746	0.883	0.907	0.555556	2.57751	2.44476
Zfp521	3.81265e-12	-0.132342	0.069	0.15	7.57192e-08	0.260206	0.127864
Trip12	4.03381e-08	-0.131981	0.207	0.305	0.000801115	0.487504	0.355524
BC005561	9.38775e-07	-0.131825	0.201	0.286	0.0186441	0.513003	0.381178
Ablim1	0.000116871	-0.131746	0.527	0.601	1	1.22814	1.09639
Col18a1	6.55415e-05	-0.131344	0.111	0.164	1	0.431205	0.29986
Slc16a2	7.94727e-07	-0.131338	0.14	0.213	0.0157833	0.388854	0.257515
Dock6	8.80309e-07	-0.131232	0.27	0.359	0.0174829	0.61634	0.485108
Ldhb	4.44184e-11	-0.131228	0.092	0.179	8.8215e-07	0.322863	0.191635
Zfp106	9.60608e-09	-0.131142	0.15	0.236	0.000190777	0.381999	0.250858
Hook3	6.08872e-07	-0.130918	0.24	0.331	0.0120922	0.56123	0.430312
Dnm1l	1.24563e-07	-0.130632	0.154	0.234	0.00247383	0.393881	0.263249
Myef2	2.10041e-08	-0.130496	0.12	0.198	0.000417142	0.333158	0.202662
Lims1	3.32245e-06	-0.130339	0.384	0.475	0.0659838	0.821587	0.691248
Eif4e3	4.36566e-07	-0.130338	0.166	0.246	0.0086702	0.414159	0.283821
Kdm5a	7.75368e-08	-0.130175	0.174	0.26	0.00153988	0.425277	0.295101
Eef2	4.58687e-10	-0.129962	0.981	0.989	9.10951e-06	2.68038	2.55042
Tek	4.14318e-05	-0.129622	0.621	0.684	0.822835	1.4383	1.30868
Hnrpdl	7.18992e-06	-0.129618	0.476	0.571	0.142792	0.953148	0.823529
Cnbp	1.81668e-09	-0.12948	0.884	0.932	3.60792e-05	1.88209	1.75261
Tle4	3.65867e-09	-0.129477	0.139	0.228	7.26611e-05	0.383579	0.254101
Nbeal1	9.68387e-08	-0.129434	0.172	0.257	0.00192322	0.436646	0.307212
Rps14	3.97894e-13	-0.129406	0.999	0.999	7.90217e-09	3.64884	3.51944
Emp3	8.29844e-07	-0.129376	0.31	0.413	0.0164807	0.886301	0.756925
Kazald1	1.33507e-08	-0.129371	0.081	0.15	0.000265144	0.296679	0.167308
Csde1	4.29348e-05	-0.129119	0.555	0.633	0.852685	1.11144	0.982324
Tgtp1	2.83225e-08	-0.129107	0.054	0.11	0.000562484	0.237003	0.107896
Cpd	1.29266e-07	-0.129043	0.403	0.51	0.00256721	0.853738	0.724695
Gbp6	0.000122803	-0.128841	0.12	0.173	1	0.383004	0.254164
Gpr124	5.9747e-11	-0.128741	0.063	0.136	1.18658e-06	0.260463	0.131722
Kdm5c	1.50263e-11	-0.128715	0.087	0.172	2.98422e-07	0.273639	0.144924
Mpzl1	2.6082e-06	-0.128406	0.272	0.361	0.0517988	0.663819	0.535413
Itm2a	1.66329e-08	-0.128169	0.048	0.104	0.00033033	0.231788	0.103619
Sema4c	0.000162404	-0.128165	0.252	0.321	1	0.63786	0.509695
Klf9	7.5778e-06	-0.128097	0.691	0.751	0.150495	1.53377	1.40567
Lmo2	0.0076684	-0.127977	0.513	0.557	1	1.14836	1.02038
Cbx6	9.08998e-06	-0.127828	0.192	0.263	0.180527	0.450632	0.322804
Ctnnb1	5.15614e-06	-0.127761	0.699	0.766	0.102401	1.48386	1.3561
Klf10	0.000569337	-0.127749	0.32	0.388	1	0.799514	0.671765
Atxn1	7.64449e-07	-0.127704	0.176	0.254	0.015182	0.453832	0.326128
Slc25a4	1.76893e-07	-0.127631	0.691	0.754	0.0035131	1.42658	1.29895
Casp4	0.00520073	-0.127543	0.237	0.284	1	0.612685	0.485142
Rnd1	0.00710433	-0.127269	0.32	0.373	1	1.99051	1.86324
Tnrc6a	8.21938e-07	-0.127127	0.25	0.341	0.0163237	0.562748	0.435621
Gm6654	1.55599e-09	-0.126991	0.126	0.212	3.09019e-05	0.334257	0.207267
Tulp4	5.06985e-09	-0.126982	0.133	0.22	0.000100687	0.36223	0.235248
Mtap4	4.43527e-06	-0.126752	0.342	0.434	0.0880844	0.761055	0.634303
Gfod1	1.07441e-07	-0.126717	0.101	0.17	0.00213377	0.306747	0.18003
Arl4a	0.00011534	-0.126574	0.471	0.54	1	1.07015	0.943576
Tnfrsf12a	2.5215e-05	-0.126548	0.272	0.352	0.500769	0.79935	0.672802
Hnrnpu	7.44703e-05	-0.126356	0.645	0.723	1	1.30435	1.178
Rpl37a	2.7691e-11	-0.126264	0.998	0.998	5.49943e-07	3.59777	3.4715
Pdia3	2.16817e-07	-0.126252	0.759	0.837	0.00430599	1.6567	1.53044
Tmtc2	5.8564e-06	-0.1261	0.109	0.168	0.116308	0.334994	0.208894
Rbpj	1.11715e-09	-0.126097	0.121	0.207	2.21866e-05	0.327473	0.201376
Nfatc1	1.72622e-08	-0.126082	0.138	0.222	0.000342828	0.366288	0.240206
Yy1	3.4874e-07	-0.126072	0.295	0.392	0.00692597	0.631571	0.5055
Eml4	9.57425e-11	-0.126001	0.082	0.162	1.90145e-06	0.265547	0.139546
Tsc22d2	6.97456e-08	-0.125972	0.139	0.221	0.00138515	0.380329	0.254358
Ptgs1	0.00231997	-0.12597	0.268	0.316	1	0.752687	0.626716
Pds5b	3.4534e-09	-0.125922	0.113	0.194	6.85845e-05	0.32488	0.198958
Phxr4	7.22231e-09	-0.12586	0.1	0.176	0.000143435	0.311096	0.185237
Spnb2	3.44526e-10	-0.12581	0.883	0.925	6.84229e-06	2.20261	2.0768
Zfp462	4.7315e-15	-0.125798	0.04	0.117	9.39676e-11	0.188307	0.0625089
B230219D22Rik	9.9811e-06	-0.12559	0.399	0.488	0.198225	0.846672	0.721083
Jak1	7.44556e-05	-0.125578	0.507	0.589	1	1.06327	0.937688
Sqstm1	0.0686387	-0.125409	0.616	0.656	1	1.37867	1.25326
Sfrs18	5.06171e-06	-0.125396	0.376	0.466	0.100526	0.825612	0.700216
Ppfibp1	0.000127014	-0.12495	0.323	0.4	1	0.728025	0.603076
Cox7a2l	1.33076e-06	-0.124837	0.814	0.828	0.026429	1.77564	1.6508
Nolc1	0.0004069	-0.124806	0.184	0.237	1	0.449464	0.324658
Rps19	6.90159e-11	-0.124788	0.996	0.998	1.37066e-06	3.44025	3.31546
Airn	1.13788e-12	-0.12464	0.053	0.129	2.25982e-08	0.217268	0.0926279
Elf2	1.74253e-06	-0.124576	0.15	0.222	0.0346067	0.384946	0.26037
Lmcd1	0.000218326	-0.124483	0.348	0.421	1	0.901128	0.776645
Zfhx3	0.0249546	-0.124416	0.214	0.251	1	0.559314	0.434898
Plekhg1	7.27624e-11	-0.124395	0.117	0.212	1.44506e-06	0.328343	0.203948
Wdr43	2.58672e-06	-0.124372	0.148	0.216	0.0513723	0.364202	0.23983
N4bp1	1.71737e-05	-0.124283	0.232	0.309	0.34107	0.526046	0.401763
Zfp131	0.000194434	-0.124268	0.176	0.232	1	0.417459	0.293191
H2-Q8	1.06244e-08	-0.12392	0.126	0.212	0.000211	0.381011	0.257091
Ubxn4	1.95204e-05	-0.12376	0.4	0.489	0.387675	0.83375	0.70999
Sfxn1	4.30952e-11	-0.123653	0.106	0.197	8.55871e-07	0.315687	0.192035
Usp9x	1.89713e-08	-0.123598	0.223	0.322	0.00037677	0.516174	0.392576
Wnk1	5.96234e-05	-0.123537	0.461	0.538	1	0.955332	0.831794
Clip1	2.83783e-05	-0.123495	0.132	0.189	0.563593	0.348792	0.225298
Mll1	2.37314e-08	-0.12348	0.208	0.307	0.000471306	0.502505	0.379026
Baz2a	1.78319e-09	-0.123364	0.152	0.247	3.54142e-05	0.380763	0.257399
Snhg8	8.9051e-06	-0.123355	0.498	0.589	0.176855	1.12996	1.0066
Ppp1cb	0.000704517	-0.123144	0.54	0.606	1	1.10403	0.98089
Sap18	5.87647e-06	-0.123107	0.212	0.291	0.116707	0.510467	0.38736
Itga6	6.11351e-08	-0.123088	0.238	0.34	0.00121414	0.581149	0.458061
Adamts9	0.000764611	-0.122929	0.131	0.178	1	0.391417	0.268488
Il6st	4.67419e-06	-0.122917	0.456	0.535	0.0928294	1.12761	1.0047
Stab1	4.23225e-05	-0.122829	0.226	0.298	0.840525	0.664148	0.541318
Rod1	1.20431e-05	-0.122822	0.476	0.56	0.239177	0.970657	0.847835
B2m	7.07278e-11	-0.122785	1	0.997	1.40465e-06	4.05002	3.92723
Col4a3bp	1.9967e-06	-0.122453	0.124	0.188	0.0396545	0.323284	0.200831
2900026A02Rik	2.39578e-05	-0.122087	0.264	0.342	0.475802	0.599339	0.477252
Suv420h1	1.20441e-07	-0.12196	0.128	0.204	0.00239196	0.34229	0.220331
Gbp9	1.08404e-06	-0.121931	0.154	0.227	0.0215291	0.412492	0.290561
Rpl3	7.61884e-09	-0.121829	0.987	0.989	0.00015131	2.8297	2.70787
Hectd1	8.12804e-07	-0.121546	0.29	0.385	0.0161423	0.611874	0.490328
Hnrnpl	7.34956e-06	-0.121486	0.284	0.366	0.145962	0.596201	0.474716
Top2b	6.00221e-06	-0.121444	0.225	0.303	0.119204	0.503702	0.382258
Rnf19a	1.11451e-07	-0.12133	0.159	0.243	0.00221342	0.402243	0.280914
Ncor1	2.93753e-06	-0.121181	0.489	0.592	0.0583393	1.02962	0.90844
Fn1	0.549201	-0.121157	0.185	0.194	1	0.684442	0.563285
Odc1	7.19253e-06	-0.121044	0.339	0.419	0.142844	0.958245	0.837201
Synm	4.05851e-05	-0.12094	0.148	0.209	0.806021	0.417165	0.296225
Ankrd17	5.24412e-05	-0.120902	0.207	0.272	1	0.465502	0.3446
Anxa1	0.00524175	-0.120896	0.216	0.269	1	0.689907	0.569011
Rabep1	7.7782e-09	-0.120859	0.156	0.246	0.000154475	0.391964	0.271105
Ankhd1	1.73006e-09	-0.120717	0.158	0.255	3.43589e-05	0.398517	0.2778
Zbtb11	3.17278e-09	-0.120711	0.081	0.154	6.30115e-05	0.264922	0.144211
Baz1a	0.00506623	-0.120703	0.172	0.211	1	0.424131	0.303428
Gbp3	0.000353807	-0.120617	0.247	0.312	1	0.608922	0.488305
Gsk3b	6.57033e-06	-0.120439	0.392	0.491	0.130487	0.827451	0.707012
Nucks1	1.6414e-06	-0.120411	0.351	0.448	0.0325982	0.748052	0.627641
R3hdm2	1.72744e-06	-0.120312	0.196	0.273	0.034307	0.443759	0.323448
Fmr1	4.25038e-08	-0.120302	0.138	0.221	0.000844125	0.371944	0.251642
Zfp445	4.85441e-07	-0.120249	0.117	0.187	0.00964085	0.318032	0.197782
Wipf3	4.9735e-12	-0.120036	0.037	0.102	9.87737e-08	0.209847	0.0898108
Jund	2.9687e-08	-0.119902	0.933	0.967	0.000589584	2.90732	2.78742
Mfge8	0.0188247	-0.119821	0.602	0.643	1	1.30863	1.18881
Sparcl1	0.0730591	-0.119799	0.623	0.638	1	2.11079	1.991
Gabpb1	0.000303675	-0.119735	0.191	0.25	1	0.482063	0.362328
Itpr2	5.07135e-09	-0.119547	0.13	0.217	0.000100717	0.357845	0.238298
Ubb	6.495e-07	-0.119529	0.994	1	0.0128991	3.336	3.21647
Samd12	5.6564e-09	-0.119392	0.057	0.119	0.000112336	0.234216	0.114825
Sox4	1.26103e-07	-0.119066	0.157	0.245	0.00250441	0.471939	0.352873
Afap1	8.90519e-11	-0.119044	0.124	0.222	1.76857e-06	0.343806	0.224761
Ripk1	9.08644e-06	-0.118614	0.208	0.284	0.180457	0.512991	0.394376
Tmf1	3.39484e-06	-0.118413	0.248	0.333	0.0674216	0.563275	0.444862
Kdm2a	1.29525e-08	-0.118372	0.146	0.233	0.000257238	0.359204	0.240832
Camk2g	0.000769091	-0.118344	0.189	0.245	1	0.456642	0.338298
Rsf1	1.51365e-08	-0.11825	0.134	0.22	0.000300611	0.35195	0.2337
A430107O13Rik	1.65919e-11	-0.118093	0.09	0.179	3.29516e-07	0.2881	0.170007
Dync1i2	3.85369e-05	-0.118082	0.465	0.546	0.765343	0.95215	0.834068
Aff1	1.77904e-07	-0.118053	0.106	0.176	0.00353318	0.301132	0.183079
Rpl18a	3.34337e-12	-0.118038	1	0.999	6.63993e-08	3.60475	3.48671
Nab2	5.55758e-08	-0.117976	0.134	0.215	0.00110374	0.381122	0.263146
H2-T10	1.18059e-08	-0.117885	0.058	0.119	0.000234464	0.222627	0.104741
Kitl	0.0145265	-0.11786	0.555	0.598	1	1.31513	1.19727
Wapal	3.5004e-07	-0.117786	0.154	0.231	0.00695179	0.378863	0.261077
Phf3	4.29238e-09	-0.117749	0.143	0.232	8.52468e-05	0.358012	0.240263
Brwd1	5.72473e-07	-0.117504	0.138	0.211	0.0113693	0.367928	0.250423
2010003O02Rik	1.30879e-06	-0.1175	0.223	0.313	0.0259926	0.520684	0.403184
Ifih1	0.000197023	-0.117483	0.163	0.219	1	0.409844	0.292361
Wtap	4.21943e-06	-0.117446	0.282	0.372	0.0837978	0.628345	0.510899
Strn3	0.000119745	-0.117395	0.406	0.487	1	0.815199	0.697803
Hoxd9	1.70725e-08	-0.117374	0.047	0.102	0.000339059	0.217142	0.0997684
H2-Q7	5.97642e-08	-0.116792	0.054	0.108	0.00118692	0.214451	0.0976585
Zfp326	1.13655e-06	-0.116786	0.183	0.265	0.0225719	0.442669	0.325883
Senp6	1.15343e-06	-0.116716	0.245	0.335	0.0229072	0.550922	0.434206
Vgll4	1.62412e-07	-0.116642	0.197	0.288	0.0032255	0.505267	0.388625
Myo10	0.000189002	-0.116638	0.331	0.402	1	0.775604	0.658966
BC031781	1.37259e-07	-0.116507	0.227	0.325	0.00272597	0.551533	0.435026
Gm9781	2.20442e-08	-0.116454	0.137	0.22	0.000437798	0.349596	0.233142
Slc4a7	3.04548e-08	-0.116405	0.062	0.122	0.000604832	0.223807	0.107402
Slc7a1	1.92213e-11	-0.116374	0.059	0.133	3.81734e-07	0.220322	0.103948
Ptgis	3.27947e-05	-0.116362	0.084	0.133	0.651303	0.334061	0.217699
Sh3glb2	2.95233e-05	-0.116341	0.286	0.362	0.586333	0.628316	0.511975
Suz12	6.27322e-06	-0.116299	0.123	0.184	0.124586	0.325473	0.209174
Epc2	4.18789e-08	-0.116273	0.128	0.207	0.000831715	0.335443	0.21917
D4Wsu53e	4.17885e-07	-0.116266	0.757	0.816	0.0082992	1.69786	1.5816
Rps6	1.27397e-08	-0.116226	0.995	0.994	0.000253011	3.19214	3.07592
Tap1	0.00143811	-0.116199	0.339	0.401	1	0.773678	0.657479
Kif26a	7.78481e-07	-0.115863	0.126	0.196	0.0154606	0.33785	0.221987
Igf1r	1.71297e-06	-0.115567	0.232	0.321	0.0340196	0.528065	0.412498
Luc7l	4.76124e-09	-0.11554	0.143	0.233	9.45582e-05	0.355732	0.240192
Tox4	5.76991e-07	-0.115375	0.152	0.228	0.011459	0.37397	0.258596
Jmjd1c	0.0017694	-0.115347	0.211	0.26	1	0.482927	0.367581
Atp1b3	0.00242619	-0.115317	0.56	0.612	1	1.24436	1.12905
Pcsk5	1.67875e-05	-0.115308	0.067	0.115	0.333401	0.270587	0.155279
Taf1d	3.91803e-05	-0.115261	0.262	0.333	0.778122	0.578184	0.462923
Tnfrsf10b	1.7967e-07	-0.11507	0.146	0.227	0.00356825	0.412388	0.297318
Adamts4	0.0312392	-0.114967	0.094	0.119	1	0.429572	0.314606
Cdc14a	5.77987e-10	-0.114891	0.055	0.12	1.14788e-05	0.210193	0.0953012
Cd63	5.9951e-08	-0.114694	0.302	0.405	0.00119063	1.01944	0.904744
Wsb1	3.13421e-06	-0.114572	0.444	0.539	0.0622454	0.998062	0.88349
Brd9	6.99711e-06	-0.114478	0.228	0.31	0.138963	0.522022	0.407544
Pir	0.00297401	-0.114419	0.141	0.183	1	0.380834	0.266415
Mpp5	5.06953e-09	-0.114397	0.094	0.168	0.000100681	0.274417	0.16002
1700020I14Rik	4.92927e-05	-0.114305	0.222	0.288	0.978952	0.488921	0.374616
Ano6	0.000153493	-0.11424	0.35	0.423	1	0.744802	0.630562
Cxcl16	2.92109e-05	-0.113984	0.221	0.294	0.580129	0.596843	0.482859
Zmym5	4.93104e-06	-0.113719	0.21	0.289	0.0979304	0.483629	0.36991
Dnmt3a	3.95923e-11	-0.113719	0.069	0.147	7.86303e-07	0.231094	0.117375
Map3k1	4.82505e-07	-0.113673	0.176	0.258	0.00958255	0.426966	0.313293
Diap2	2.58888e-06	-0.11354	0.139	0.207	0.0514152	0.345644	0.232104
Hnrnpa0	4.53126e-05	-0.113523	0.304	0.381	0.899909	0.63713	0.523607
Sec63	3.43631e-06	-0.113447	0.225	0.307	0.0682451	0.490227	0.37678
Ednrb	0.169792	-0.113441	0.309	0.334	1	1.02793	0.914489
Mapre1	5.74626e-06	-0.113275	0.578	0.665	0.114121	1.15645	1.04317
Ascc3	2.72983e-06	-0.11322	0.094	0.152	0.0542145	0.276052	0.162832
Fndc3a	8.88218e-08	-0.113179	0.151	0.234	0.001764	0.378363	0.265184
BC002163	1.94763e-07	-0.113156	0.212	0.302	0.00386799	0.487628	0.374472
Zcchc11	3.25091e-07	-0.113093	0.11	0.179	0.00645631	0.301273	0.18818
Clk1	2.18616e-05	-0.113057	0.471	0.564	0.434172	0.991614	0.878557
Ugdh	5.36334e-08	-0.112878	0.105	0.179	0.00106516	0.293031	0.180153
Nin	4.90896e-07	-0.112677	0.132	0.203	0.0097492	0.330763	0.218086
Bcap29	5.46031e-09	-0.112375	0.081	0.152	0.000108442	0.253347	0.140971
Sema6a	0.000504571	-0.112202	0.417	0.48	1	0.893057	0.780855
Arl15	0.000562296	-0.11216	0.122	0.166	1	0.340862	0.228702
Bccip	3.22863e-06	-0.112089	0.281	0.373	0.0641206	0.584833	0.472745
Emcn	0.000461719	-0.111773	0.749	0.8	1	2.15164	2.03987
Insig1	1.87886e-06	-0.11175	0.103	0.165	0.0373142	0.308157	0.196407
Crebbp	3.22049e-07	-0.111666	0.134	0.208	0.00639589	0.337098	0.225432
Eif4a1	0.176029	-0.111633	0.87	0.878	1	1.99865	1.88702
Ewsr1	8.71488e-06	-0.111615	0.463	0.566	0.173078	0.908853	0.797237
Gnb1	4.7462e-05	-0.111583	0.829	0.886	0.942596	1.93098	1.8194
Itpkb	2.01936e-07	-0.111547	0.054	0.106	0.00401044	0.203491	0.0919445
Pqlc1	6.49318e-05	-0.111384	0.296	0.378	1	0.677863	0.566479
Mustn1	0.0514162	-0.111215	0.342	0.383	1	1.11888	1.00766
Eif4g2	9.78922e-05	-0.111151	0.786	0.858	1	1.63255	1.5214
C230081A13Rik	4.17917e-09	-0.111097	0.142	0.235	8.29984e-05	0.37353	0.262433
Mxra8	9.53771e-11	-0.110861	0.16	0.269	1.89419e-06	0.455016	0.344155
4933407H18Rik	6.62944e-05	-0.110749	0.108	0.16	1	0.293182	0.182433
Fbn1	2.35918e-06	-0.110683	0.107	0.17	0.0468533	0.305816	0.195133
Aggf1	0.000146799	-0.110594	0.198	0.262	1	0.454992	0.344398
Baz1b	2.18397e-05	-0.110564	0.201	0.271	0.433736	0.460456	0.349891
Ccdc107	0.000956622	-0.110375	0.19	0.244	1	0.43413	0.323755
Ubr1	8.29616e-08	-0.110279	0.114	0.189	0.00164762	0.299192	0.188913
Mal	3.02457e-09	-0.110226	0.078	0.151	6.00679e-05	0.381627	0.271402
Lass4	3.45913e-06	-0.110221	0.255	0.347	0.0686983	0.581629	0.471407
Zfp148	6.24176e-06	-0.110102	0.198	0.276	0.123961	0.462709	0.352607
Hnrnph1	0.000252301	-0.110013	0.55	0.621	1	1.10364	0.993628
Eif3e	0.000101537	-0.11	0.606	0.656	1	1.1809	1.0709
Slfn5	0.00764595	-0.109912	0.699	0.731	1	1.77761	1.6677
Nsd1	6.35966e-06	-0.109905	0.193	0.267	0.126303	0.442875	0.332969
2810474O19Rik	0.000243611	-0.109846	0.218	0.28	1	0.534002	0.424156
Eif4b	0.000190468	-0.109737	0.444	0.511	1	0.878028	0.768291
Larp7	9.67574e-07	-0.109579	0.162	0.239	0.019216	0.402802	0.293223
Smc1a	1.87888e-05	-0.109537	0.346	0.429	0.373146	0.722265	0.612728
Sp100	6.26413e-08	-0.109535	0.128	0.207	0.00124406	0.335681	0.226146
C130039O16Rik	1.37862e-05	-0.109508	0.109	0.166	0.273794	0.292463	0.182956
Nsun6	1.4464e-09	-0.109432	0.075	0.148	2.87256e-05	0.248561	0.139129
Tnfaip1	0.00110202	-0.109303	0.486	0.556	1	1.01199	0.902685
Fchsd2	7.11313e-06	-0.109215	0.111	0.17	0.141267	0.310325	0.20111
Pwwp2a	1.02999e-07	-0.109173	0.148	0.23	0.00204556	0.371893	0.262721
N4bp2l2	4.17884e-07	-0.109132	0.268	0.367	0.00829917	0.583403	0.474271
BC018507	1.95046e-08	-0.109002	0.083	0.152	0.000387361	0.248997	0.139995
Pdlim5	0.000231571	-0.108922	0.318	0.386	1	0.660975	0.552053
Daam1	0.000663969	-0.108807	0.151	0.2	1	0.405977	0.297169
Kif1b	0.000326491	-0.108805	0.26	0.323	1	0.557523	0.448718
Wls	3.33723e-05	-0.10873	0.206	0.279	0.662774	0.488486	0.379756
Zbtb7a	2.31079e-06	-0.108587	0.318	0.406	0.0458922	0.676957	0.568371
Ints6	1.57647e-08	-0.108586	0.065	0.128	0.000313086	0.224568	0.115982
G3bp2	9.07587e-06	-0.108554	0.383	0.473	0.180247	0.775296	0.666742
Phf20l1	0.000129508	-0.108362	0.281	0.351	1	0.591402	0.48304
Vwf	8.443e-06	-0.108268	0.379	0.476	0.167678	1.74828	1.64001
Thoc2	2.66643e-07	-0.108193	0.298	0.405	0.00529552	0.642447	0.534254
Bdp1	9.98259e-07	-0.107995	0.12	0.188	0.0198254	0.322365	0.21437
Eml2	4.26909e-10	-0.107968	0.057	0.124	8.47841e-06	0.203891	0.0959228
Ube2s	0.0179579	-0.107849	0.629	0.67	1	1.26293	1.15508
Sbno1	3.23824e-08	-0.107845	0.245	0.352	0.000643115	0.538344	0.430499
Calm1	0.000195742	-0.10784	0.991	0.98	1	2.86577	2.75793
Ppp4r2	2.15653e-05	-0.107761	0.22	0.293	0.428287	0.480371	0.372611
Srsf1	0.00023101	-0.107658	0.339	0.41	1	0.680534	0.572876
Akap7	2.12005e-09	-0.107622	0.076	0.148	4.21041e-05	0.241513	0.133891
Atpif1	1.08454e-05	-0.107514	0.541	0.64	0.21539	1.16927	1.06175
Ankrd10	8.74652e-07	-0.107429	0.12	0.189	0.0173706	0.311335	0.203905
Mga	5.70572e-07	-0.107376	0.15	0.228	0.0113316	0.370893	0.263517
Tln1	0.000446882	-0.107314	0.48	0.554	1	0.975127	0.867813
Eps8	1.73083e-05	-0.107222	0.103	0.158	0.343744	0.292027	0.184805
Ptms	2.43441e-06	-0.107152	0.706	0.777	0.0483475	1.63172	1.52457
Trim37	0.00104232	-0.107092	0.397	0.475	1	0.840933	0.733841
Twsg1	2.06754e-10	-0.106777	0.077	0.154	4.10613e-06	0.230596	0.123819
Ssbp3	1.04956e-08	-0.106668	0.173	0.268	0.000208443	0.400958	0.29429
Rabgef1	1.72814e-06	-0.106647	0.13	0.2	0.0343209	0.362199	0.255551
Ddx5	5.02922e-07	-0.106316	0.988	0.993	0.00998803	2.70177	2.59546
Dido1	3.57306e-07	-0.106225	0.131	0.204	0.00709609	0.325318	0.219093
Vaultrc5	9.00867e-08	-0.106125	0.069	0.129	0.00178912	0.233373	0.127248
Cttnbp2nl	0.00400174	-0.106073	0.353	0.399	1	0.748163	0.64209
D19Wsu162e	0.000295997	-0.10606	0.204	0.261	1	0.469576	0.363516
Zfp467	3.82499e-06	-0.106001	0.184	0.262	0.0759643	0.451296	0.345295
2610029G23Rik	1.67332e-06	-0.105884	0.122	0.189	0.0332321	0.310564	0.204681
Nek7	5.79703e-06	-0.105735	0.146	0.214	0.115129	0.348394	0.242659
St6gal1	1.28001e-11	-0.105717	0.052	0.124	2.54211e-07	0.195269	0.0895514
Arhgef1	9.64186e-05	-0.105563	0.362	0.444	1	0.731383	0.62582
Iws1	1.63744e-06	-0.105543	0.13	0.198	0.0325196	0.332426	0.226883
Ifrd1	0.00862183	-0.105486	0.462	0.522	1	1.21326	1.10778
Spry4	0.0005865	-0.105328	0.166	0.221	1	0.437804	0.332476
Itpripl1	0.0194521	-0.105183	0.233	0.275	1	0.609151	0.503968
Ppig	5.58825e-05	-0.105153	0.379	0.463	1	0.787233	0.682079
Tnks2	1.47643e-06	-0.104984	0.222	0.31	0.0293219	0.488361	0.383377
4921513D23Rik	7.93389e-06	-0.104939	0.198	0.272	0.157567	0.479134	0.374195
Ppp1r18	0.00394428	-0.104844	0.388	0.444	1	0.819776	0.714933
Pum2	0.000154324	-0.104782	0.363	0.436	1	0.735817	0.631035
Smc5	2.14148e-07	-0.104776	0.071	0.129	0.00425298	0.228929	0.124153
Phip	3.84021e-05	-0.10473	0.205	0.275	0.762665	0.460932	0.356202
Hsp90b1	7.44672e-05	-0.104679	0.731	0.798	1	1.56795	1.46328
Aebp1	0.000355877	-0.104664	0.121	0.17	1	0.357708	0.253045
Ppp1r16b	0.00259607	-0.104646	0.414	0.479	1	1.00252	0.897873
Slc5a3	1.9266e-08	-0.104556	0.056	0.116	0.000382623	0.206767	0.102211
Plac9	2.43579e-05	-0.10442	0.281	0.358	0.483748	1.42582	1.3214
2610507B11Rik	0.00014587	-0.104211	0.179	0.237	1	0.396025	0.291814
Dusp8	6.16288e-05	-0.103957	0.209	0.277	1	0.530934	0.426977
Fyco1	7.12522e-07	-0.103778	0.076	0.133	0.0141507	0.224363	0.120585
Hmbs	0.0014109	-0.103591	0.123	0.166	1	0.307331	0.20374
Kcmf1	1.22964e-05	-0.103541	0.258	0.337	0.244207	0.541913	0.438372
Smek2	5.85076e-05	-0.103539	0.204	0.275	1	0.452609	0.349069
Rsrc1	7.30079e-09	-0.103516	0.101	0.179	0.000144994	0.280461	0.176945
Xrn2	3.33268e-05	-0.103409	0.21	0.281	0.661871	0.464011	0.360602
Trib1	0.00318207	-0.103401	0.238	0.287	1	0.631938	0.528537
Snx18	0.00146513	-0.103309	0.17	0.216	1	0.414723	0.311414
Ddx46	8.58355e-07	-0.103157	0.189	0.272	0.0170469	0.433359	0.330202
Frmd4b	2.07614e-05	-0.102975	0.127	0.188	0.412321	0.342685	0.23971
Ppp2r5c	0.000493968	-0.102906	0.247	0.305	1	0.507424	0.404518
Fxyd6	1.51677e-06	-0.102882	0.132	0.204	0.0301231	0.682308	0.579426
Alpl	3.88521e-05	-0.102846	0.121	0.18	0.771602	0.52344	0.420595
Clcn4-2	1.28186e-06	-0.10283	0.231	0.319	0.0254578	0.526926	0.424096
Eif3f	9.45782e-05	-0.102804	0.825	0.864	1	1.75824	1.65544
Ube2h	2.09341e-05	-0.102778	0.278	0.359	0.415751	0.590806	0.488028
Rplp0	4.81871e-09	-0.102502	0.993	0.992	9.56996e-05	3.13611	3.0336
Chd3	3.53258e-09	-0.102445	0.113	0.198	7.0157e-05	0.307285	0.20484
Cstf3	3.50532e-06	-0.102405	0.134	0.201	0.0696156	0.34482	0.242415
Sorbs1	6.53386e-05	-0.102382	0.352	0.443	1	0.83704	0.734658
Slc1a5	1.93717e-05	-0.102131	0.108	0.165	0.384722	0.314728	0.212596
Gbp7	0.00217541	-0.102065	0.406	0.477	1	0.907194	0.805129
Slk	2.85477e-05	-0.101916	0.229	0.304	0.566958	0.503562	0.401647
A830007P12Rik	0.00323481	-0.101865	0.094	0.13	1	0.284181	0.182316
Arcn1	2.2886e-05	-0.101811	0.223	0.297	0.454517	0.478943	0.377133
Msl2	3.87133e-05	-0.101087	0.17	0.235	0.768847	0.391138	0.290051
Atp2b1	1.13144e-05	-0.101064	0.487	0.588	0.224705	1.0921	0.991035
Adk	0.00412331	-0.101057	0.22	0.27	1	0.552805	0.451747
Arl5b	3.30886e-08	-0.101006	0.067	0.13	0.000657139	0.220633	0.119627
Abl2	2.20637e-06	-0.100921	0.092	0.151	0.0438184	0.258026	0.157104
Trim30a	0.00133155	-0.100822	0.289	0.352	1	0.665748	0.564927
Ptpn11	2.53541e-05	-0.100771	0.196	0.267	0.503532	0.440379	0.339608
Fam126a	1.36557e-06	-0.100589	0.08	0.136	0.0271202	0.228235	0.127646
Magi1	1.19454e-09	-0.10052	0.098	0.18	2.37235e-05	0.280858	0.180338
Casc4	0.192106	-0.100455	0.14	0.156	1	0.464103	0.363647
Hivep1	3.14018e-07	-0.100403	0.09	0.154	0.00623639	0.248284	0.147881
Eid1	1.36695e-05	-0.100306	0.269	0.354	0.271477	0.566624	0.466318
Prnp	0.00253706	-0.10026	0.298	0.356	1	0.773937	0.673677
Psme4	3.45713e-06	-0.100144	0.096	0.155	0.0686587	0.253477	0.153333
Psip1	5.70062e-07	-0.100133	0.141	0.216	0.0113214	0.360612	0.260478
Btaf1	2.5323e-08	-0.100093	0.088	0.159	0.000502915	0.25838	0.158287
Luzp1	6.26916e-05	-0.100022	0.528	0.61	1	1.06127	0.961246
Dennd5b	0.000276641	-0.0998906	0.293	0.366	1	0.636449	0.536558
Mll3	6.55645e-07	-0.0998764	0.194	0.281	0.0130211	0.440382	0.340506
Topors	4.84971e-06	-0.0998289	0.182	0.26	0.0963152	0.449477	0.349648
Atl2	4.29966e-08	-0.0997149	0.129	0.211	0.000853912	0.331081	0.231366
Chd7	1.13321e-05	-0.0995599	0.14	0.203	0.225056	0.347443	0.247883
Sema3c	0.0199324	-0.0995108	0.272	0.22	1	1.16151	1.062
Plk3	0.000118171	-0.0994546	0.222	0.291	1	0.554522	0.455067
Acvr1	3.9411e-10	-0.0993011	0.07	0.143	7.82702e-06	0.224717	0.125416
Pde12	0.00184898	-0.0992247	0.221	0.278	1	0.650877	0.551652
Actr3	0.00182365	-0.0990065	0.598	0.68	1	1.1978	1.0988
Slmap	0.000175127	-0.0988075	0.177	0.238	1	0.397866	0.299058
Rgs16	1.57172e-06	-0.0987349	0.114	0.182	0.0312143	0.610244	0.511509
Naa15	1.91106e-05	-0.0985944	0.158	0.224	0.379536	0.367546	0.268952
Ttc14	2.30721e-05	-0.0985335	0.232	0.31	0.458212	0.521617	0.423083
Fam76b	1.99299e-06	-0.0984014	0.101	0.164	0.0395807	0.275385	0.176983
Lphn2	6.68076e-05	-0.0983447	0.299	0.379	1	0.663249	0.564904
Psen2	1.26545e-07	-0.0983418	0.161	0.245	0.00251319	0.450186	0.351844
Lamb2	0.000366636	-0.0983161	0.345	0.418	1	0.743725	0.645409
Sp1	2.63342e-05	-0.0982119	0.165	0.23	0.522998	0.378165	0.279953
Phf14	1.1151e-05	-0.0981712	0.14	0.204	0.221459	0.330647	0.232476
Gm9320	8.66776e-06	-0.0981531	0.286	0.375	0.172142	0.619356	0.521203
1110002B05Rik	9.76206e-05	-0.0981215	0.522	0.598	1	1.01557	0.917444
Filip1	1.74879e-07	-0.0981129	0.07	0.129	0.00347309	0.231584	0.133471
Lbh	0.00123463	-0.0980349	0.17	0.219	1	0.438425	0.34039
Zeb2	0.000165754	-0.0980005	0.104	0.151	1	0.285613	0.187612
Yap1	0.000262542	-0.0977507	0.207	0.268	1	0.462008	0.364258
Bsg	0.000630759	-0.097666	0.894	0.9	1	2.10827	2.01061
Zfp800	4.83477e-07	-0.0972856	0.127	0.2	0.00960185	0.322655	0.22537
Irf2bp2	0.000529674	-0.0972204	0.232	0.291	1	0.503524	0.406304
Ccdc88a	1.20803e-05	-0.0971748	0.136	0.198	0.239914	0.331289	0.234114
Maged2	0.0152299	-0.0971688	0.126	0.16	1	0.348987	0.251818
Cldn15	0.0710805	-0.0971195	0.202	0.23	1	0.567942	0.470822
Notch1	0.00692322	-0.0970491	0.469	0.519	1	0.944078	0.847028
Il17rd	6.8565e-07	-0.0970304	0.082	0.142	0.013617	0.250783	0.153753
Rbbp8	1.8502e-05	-0.0967854	0.075	0.124	0.367451	0.221149	0.124363
Ezh1	3.07298e-05	-0.096732	0.148	0.212	0.610295	0.346103	0.249371
Bcor	0.0011172	-0.0967197	0.107	0.148	1	0.290252	0.193533
Flnb	0.000170088	-0.0966625	0.382	0.461	1	0.817111	0.720448
Arhgef12	0.000604167	-0.0966176	0.455	0.531	1	0.911617	0.814999
Secisbp2l	3.84739e-06	-0.0965714	0.185	0.265	0.0764092	0.42499	0.328418
Dek	0.00117619	-0.0964261	0.473	0.54	1	0.952677	0.856251
Tbc1d1	4.48481e-06	-0.0964261	0.078	0.13	0.0890682	0.230143	0.133716
Dnajc1	1.7235e-05	-0.0963092	0.207	0.282	0.342286	0.468896	0.372587
Trpm7	2.85424e-06	-0.0962346	0.136	0.204	0.0566852	0.316659	0.220425
Csrnp1	0.000464173	-0.0961931	0.561	0.636	1	1.27147	1.17528
Prpf40a	1.25883e-05	-0.0958824	0.21	0.29	0.250004	0.468775	0.372893
Nop14	0.000243674	-0.0957655	0.141	0.192	1	0.328305	0.232539
Sp4	4.11885e-09	-0.0957451	0.054	0.115	8.18004e-05	0.183023	0.0872784
Rif1	5.43323e-08	-0.0956147	0.063	0.123	0.00107904	0.201053	0.105438
Dynlt3	5.29387e-05	-0.0953745	0.377	0.463	1	0.768011	0.672637
Pik3r1	1.95755e-05	-0.0953629	0.154	0.22	0.388769	0.362881	0.267518
Slc25a39	1.40603e-05	-0.0952285	0.14	0.203	0.279238	0.321798	0.22657
Trappc6a	2.13545e-05	-0.0952266	0.218	0.292	0.4241	0.466934	0.371707
Mark2	6.22428e-05	-0.0952096	0.225	0.294	1	0.474435	0.379225
Kdelc2	1.74836e-08	-0.0951889	0.092	0.165	0.000347224	0.249151	0.153963
Man1a2	8.65079e-05	-0.0950879	0.184	0.248	1	0.401567	0.306479
Sbf2	1.90787e-06	-0.0950544	0.147	0.22	0.0378904	0.35418	0.259125
Spry2	4.21903e-05	-0.0949201	0.104	0.159	0.8379	0.318236	0.223316
Ankrd44	0.00028742	-0.0948451	0.129	0.18	1	0.337029	0.242184
Oaz2	0.00447915	-0.094809	0.655	0.705	1	1.39657	1.30176
Itm2c	0.00303651	-0.094766	0.515	0.558	1	1.11896	1.02419
Msi2	2.17708e-05	-0.0946642	0.151	0.217	0.432367	0.358289	0.263625
Rasal2	0.00134573	-0.0946343	0.224	0.281	1	0.491936	0.397301
Arf6	0.00447262	-0.0946036	0.537	0.6	1	1.03787	0.943262
Whsc1l1	0.00052527	-0.0943744	0.247	0.311	1	0.526044	0.43167
Csnk1e	0.000532394	-0.0943597	0.325	0.391	1	0.672788	0.578428
Pml	3.72299e-06	-0.0943379	0.139	0.208	0.0739387	0.350288	0.25595
Igj	1.62937e-10	-0.0942725	0.044	0.107	3.23593e-06	0.173732	0.0794596
Fbxo11	2.74142e-07	-0.0942656	0.154	0.236	0.00544446	0.362023	0.267757
Rbbp6	0.000305538	-0.0940113	0.426	0.497	1	0.838107	0.744096
Rlim	3.78956e-05	-0.0938069	0.135	0.195	0.752607	0.339131	0.245324
2700089E24Rik	0.000221987	-0.0937946	0.419	0.498	1	0.851754	0.757959
Copz2	8.42091e-06	-0.0936719	0.26	0.35	0.167239	0.560983	0.467312
Golph3	0.00166124	-0.0934995	0.272	0.325	1	0.555119	0.461619
Jak2	0.0460196	-0.0934886	0.199	0.229	1	0.497811	0.404322
Rnf103	1.2791e-05	-0.0934716	0.14	0.205	0.254029	0.33865	0.245179
Celf1	6.96045e-05	-0.0934528	0.27	0.346	1	0.566733	0.473281
Rpl14	8.30759e-07	-0.0934068	0.987	0.994	0.0164989	2.92348	2.83008
Cdc42ep5	5.29036e-08	-0.0933341	0.087	0.156	0.00105067	0.27058	0.177246
Mprip	0.000952659	-0.093118	0.496	0.568	1	1.00216	0.909042
Gimap5	0.014651	-0.0931162	0.378	0.426	1	0.825103	0.731986
Smek1	5.14038e-05	-0.0930144	0.128	0.184	1	0.300142	0.207127
H2-D1	0.000261757	-0.0930074	0.999	0.993	1	3.67693	3.58392
Tcea1	0.000610246	-0.0929192	0.344	0.415	1	0.681157	0.588237
Wwc2	0.00176011	-0.0929017	0.2	0.248	1	0.438339	0.345437
Kbtbd2	2.60499e-05	-0.0928389	0.194	0.266	0.517352	0.432468	0.339629
Gulp1	4.08119e-06	-0.0926924	0.089	0.147	0.0810525	0.242704	0.150012
Gm6402	8.57677e-07	-0.0926401	0.327	0.438	0.0170335	0.71762	0.62498
Rasgrf2	1.505e-05	-0.0925323	0.137	0.203	0.298893	0.363528	0.270996
Atxn7	4.52201e-07	-0.0925122	0.147	0.226	0.00898072	0.359394	0.266882
D17Wsu92e	0.00150604	-0.0924557	0.235	0.294	1	0.500047	0.407591
Cldn25	0.00136731	-0.09238	0.312	0.374	1	0.631309	0.538929
Rgs3	0.0135297	-0.0923072	0.345	0.385	1	0.753764	0.661456
Srsf2	0.00114382	-0.0922937	0.786	0.835	1	1.68413	1.59184
Nudcd3	0.000556085	-0.0922782	0.313	0.387	1	0.647421	0.555143
Rnf11	0.00181191	-0.0922255	0.199	0.25	1	0.437623	0.345397
Gprc5a	0.122695	-0.0921691	0.128	0.148	1	0.447657	0.355488
Cdk19	0.02282	-0.0919144	0.176	0.214	1	0.470543	0.378628
Rtf1	4.59272e-05	-0.091888	0.397	0.488	0.912114	0.801027	0.709139
Tmem131	2.43117e-06	-0.0918159	0.123	0.19	0.0482831	0.298381	0.206565
Tspan5	3.86872e-05	-0.0916513	0.099	0.152	0.768327	0.280768	0.189116
Nucb2	2.19747e-07	-0.0915586	0.128	0.206	0.00436418	0.334459	0.2429
Hdlbp	0.000190028	-0.0915338	0.311	0.381	1	0.631117	0.539584
Pvrl2	9.52531e-07	-0.0910734	0.208	0.3	0.0189173	0.577395	0.486321
Lyar	0.000115741	-0.0907295	0.216	0.283	1	0.464974	0.374245
Ddx42	3.42202e-05	-0.0904637	0.185	0.255	0.679614	0.404586	0.314122
Foxo1	0.000381826	-0.0904541	0.375	0.456	1	0.778499	0.688045
Fundc2	0.000496649	-0.090232	0.403	0.472	1	0.804737	0.714505
Dnttip2	6.52556e-05	-0.0901927	0.276	0.356	1	0.575234	0.485041
Tmem57	0.000141448	-0.0901479	0.137	0.192	1	0.336513	0.246365
D16Ertd472e	0.00017934	-0.0901234	0.111	0.16	1	0.290692	0.200569
Pfdn1	0.00177613	-0.0901062	0.383	0.445	1	0.742752	0.652645
Clasp2	1.05456e-07	-0.0899913	0.081	0.146	0.00209436	0.226583	0.136592
Nfkb2	1.00041e-05	-0.0896111	0.167	0.239	0.198682	0.400898	0.311287
Stk40	0.0127345	-0.0895699	0.201	0.239	1	0.420373	0.330803
Mllt10	2.28822e-05	-0.0894912	0.21	0.286	0.454441	0.463296	0.373805
Kit	0.38948	-0.0894879	0.146	0.156	1	0.459205	0.369717
Ak2	1.45254e-06	-0.0894823	0.188	0.272	0.0288474	0.412043	0.322561
Zmynd8	3.45713e-06	-0.0893583	0.143	0.213	0.0686587	0.33528	0.245922
Arl13b	0.000247428	-0.0892859	0.167	0.225	1	0.400801	0.311515
0610007N19Rik	1.3634e-07	-0.0892545	0.053	0.106	0.00270772	0.197013	0.107758
Crtap	1.55095e-06	-0.0891891	0.184	0.268	0.0308018	0.405199	0.31601
Nab1	0.000589155	-0.089123	0.231	0.29	1	0.48776	0.398637
Mllt6	2.01815e-06	-0.0890909	0.17	0.249	0.0400805	0.379477	0.290386
Sarnp	0.000552786	-0.0890534	0.478	0.559	1	0.89585	0.806796
Alkbh5	0.00227198	-0.0890175	0.331	0.392	1	0.70668	0.617663
Slc16a9	0.0380138	-0.0890116	0.105	0.129	1	0.333057	0.244046
Dpysl3	2.93551e-05	-0.0890019	0.09	0.141	0.582991	0.248662	0.15966
Bzw1	0.00398499	-0.0887413	0.372	0.433	1	0.744378	0.655636
Cirh1a	1.33941e-05	-0.088564	0.114	0.174	0.266007	0.298064	0.2095
Cdkn1b	0.000496727	-0.0885276	0.186	0.244	1	0.419679	0.331152
Med13l	0.00021882	-0.088459	0.223	0.291	1	0.479407	0.390948
Myo1e	0.00114465	-0.0883904	0.122	0.165	1	0.302119	0.213728
Zbtb4	0.000428151	-0.0883832	0.311	0.383	1	0.660742	0.572359
Snhg5	0.000148075	-0.0882866	0.184	0.249	1	0.445243	0.356956
Zfp945	6.95052e-05	-0.0882854	0.142	0.202	1	0.344875	0.256589
Bcl7b	0.00154616	-0.0881804	0.283	0.344	1	0.562222	0.474042
Setd5	5.44174e-05	-0.0881341	0.269	0.347	1	0.529377	0.441243
Mall	7.24441e-05	-0.0880868	0.206	0.279	1	0.542483	0.454396
Sub1	0.00287653	-0.0880351	0.771	0.821	1	1.5766	1.48857
Paip1	3.15775e-05	-0.0879646	0.102	0.155	0.627128	0.264032	0.176068
Fam120a	1.16312e-05	-0.0879048	0.242	0.326	0.230996	0.509665	0.42176
Pdcd11	6.9636e-06	-0.0878935	0.113	0.174	0.138297	0.281646	0.193752
Pear1	3.13531e-07	-0.0878503	0.173	0.262	0.00622673	0.403423	0.315573
2610005L07Rik	0.000534663	-0.0878054	0.144	0.195	1	0.343577	0.255772
Zfp91	0.000354932	-0.0877923	0.158	0.213	1	0.340131	0.252339
Kif2a	9.67395e-05	-0.0877155	0.132	0.188	1	0.315322	0.227606
Nrip1	9.26597e-08	-0.0874954	0.064	0.123	0.00184022	0.20499	0.117494
Vamp5	0.0134992	-0.0874535	0.472	0.514	1	0.998062	0.910609
Eprs	0.000281976	-0.0874527	0.218	0.282	1	0.473949	0.386496
Mpdz	1.2069e-07	-0.0873619	0.079	0.142	0.0023969	0.227678	0.140316
C330006A16Rik	9.22058e-07	-0.0873033	0.173	0.255	0.0183121	0.389781	0.302478
Sf1	0.000418066	-0.0872412	0.38	0.453	1	0.747792	0.660551
Stox2	4.75573e-06	-0.0872238	0.088	0.144	0.0944488	0.248506	0.161282
Parp14	0.24153	-0.0872234	0.332	0.352	1	0.728593	0.64137
Car8	0.0084382	-0.0871516	0.208	0.251	1	0.677733	0.590581
Vps13c	5.97089e-06	-0.0871107	0.056	0.101	0.118582	0.173601	0.0864899
Upf3b	6.71166e-06	-0.0870004	0.135	0.204	0.133294	0.335026	0.248026
Srgap2	4.05514e-06	-0.0869584	0.143	0.215	0.080535	0.339908	0.25295
Ptp4a1	0.00149092	-0.0869193	0.087	0.124	1	0.23324	0.14632
Il11ra1	0.00134956	-0.0868706	0.188	0.238	1	0.41395	0.327079
Smc4	0.00080958	-0.0868346	0.18	0.236	1	0.412563	0.325729
Bag3	0.000121745	-0.0868142	0.364	0.445	1	0.863847	0.777032
Rps18	2.75805e-07	-0.0868036	0.995	0.994	0.00547749	3.17036	3.08356
Dock1	1.10406e-05	-0.0867526	0.163	0.233	0.219266	0.384135	0.297382
Dmd	1.67237e-08	-0.0867374	0.048	0.104	0.000332133	0.168655	0.081918
Ddhd2	3.81293e-07	-0.0866743	0.066	0.123	0.00757247	0.205688	0.119014
Cnot6l	2.80791e-05	-0.0866216	0.167	0.235	0.557651	0.383351	0.29673
Calu	0.00114526	-0.0865524	0.404	0.473	1	0.796053	0.709501
Abl1	1.60656e-06	-0.0865369	0.1	0.164	0.0319062	0.257248	0.170711
Nuak1	5.50189e-08	-0.0864438	0.055	0.111	0.00109268	0.1977	0.111257
Rab10	0.00582491	-0.0864279	0.523	0.575	1	0.989727	0.903299
Rbm27	6.71897e-07	-0.0864205	0.189	0.276	0.0133439	0.424603	0.338183
Rest	2.6085e-05	-0.0863373	0.092	0.143	0.518049	0.243502	0.157165
Pdzd2	0.00139696	-0.0862651	0.178	0.229	1	0.41482	0.328555
Trim24	1.9947e-05	-0.0862552	0.162	0.23	0.396148	0.369678	0.283422
Helz	1.58042e-08	-0.0861394	0.066	0.13	0.000313872	0.197199	0.11106
Rasa1	0.000950735	-0.0857827	0.225	0.284	1	0.46961	0.383827
Kdm5b	3.9302e-07	-0.0856377	0.073	0.132	0.00780538	0.223757	0.138119
Runx1t1	4.81248e-05	-0.0856228	0.09	0.14	0.955759	0.270587	0.184964
Rps6kb1	7.01848e-05	-0.0855516	0.23	0.303	1	0.498937	0.413385
Eif4a2	0.000223676	-0.0855102	0.795	0.822	1	1.61557	1.53006
Atp2a2	0.0155728	-0.0854476	0.318	0.367	1	0.666969	0.581521
Csnk1a1	0.000466682	-0.0854289	0.575	0.647	1	1.12311	1.03768
Dnajb6	0.00870685	-0.0854276	0.589	0.653	1	1.11772	1.03229
Arid1b	1.61203e-06	-0.0853175	0.108	0.173	0.0320149	0.273857	0.18854
Tbl1xr1	5.49007e-06	-0.0852854	0.091	0.147	0.109033	0.226888	0.141603
Rhoj	0.469555	-0.0851798	0.615	0.618	1	1.26682	1.18164
Junb	1.5434e-10	-0.0851063	0.838	0.901	3.06519e-06	3.15163	3.06652
Ctnnal1	2.74425e-05	-0.0849398	0.065	0.11	0.545007	0.21733	0.13239
Serbp1	0.000166205	-0.0849109	0.752	0.816	1	1.5373	1.45239
E330033B04Rik	1.58319e-06	-0.0848645	0.08	0.137	0.0314421	0.230994	0.14613
Tlk2	0.00066543	-0.0848342	0.109	0.153	1	0.266202	0.181367
Gstp1	0.000401057	-0.0847282	0.533	0.612	1	1.12605	1.04132
Arhgef5	1.1825e-07	-0.08465	0.071	0.131	0.00234844	0.198367	0.113717
Fam3c	0.00422201	-0.0845991	0.301	0.359	1	0.659718	0.575119
Unc13b	4.18793e-08	-0.0845821	0.079	0.146	0.000831722	0.214347	0.129765
Sltm	0.000184362	-0.0845727	0.241	0.312	1	0.506183	0.42161
Leprel2	1.57677e-05	-0.0845481	0.063	0.109	0.313146	0.206068	0.12152
Taf3	2.17683e-05	-0.0843301	0.165	0.232	0.432319	0.374658	0.290328
Amotl2	0.00028095	-0.0842533	0.348	0.42	1	0.755858	0.671605
Scarf1	0.000420714	-0.0842424	0.241	0.308	1	0.513618	0.429375
Zfp187	0.000118971	-0.0841182	0.197	0.266	1	0.463327	0.379208
Epc1	3.72315e-05	-0.0840939	0.164	0.229	0.739417	0.367679	0.283585
Clock	4.31024e-07	-0.0840325	0.074	0.133	0.00856014	0.202784	0.118752
Gramd1a	0.350065	-0.0840122	0.271	0.288	1	0.674741	0.590729
Pxdn	0.0112603	-0.0840034	0.318	0.369	1	0.678279	0.594276
Copb1	0.000851526	-0.083993	0.252	0.314	1	0.521983	0.43799
Prss23	0.532274	-0.0839512	0.341	0.348	1	1.31311	1.22916
Ep300	6.1151e-07	-0.0839411	0.079	0.138	0.0121446	0.214642	0.1307
Cd302	0.000566607	-0.083915	0.148	0.198	1	0.360622	0.276707
Eif1a	0.00308431	-0.0838563	0.346	0.406	1	0.766229	0.682373
Arhgef7	0.0046488	-0.0837867	0.275	0.328	1	0.563777	0.47999
Pitpnb	6.5086e-05	-0.0836331	0.243	0.32	1	0.503476	0.419842
Cd82	0.000913043	-0.0836009	0.156	0.206	1	0.381728	0.298127
Gm12504	3.12128e-06	-0.0835222	0.105	0.167	0.0619887	0.263839	0.180317
Scpep1	1.45239e-07	-0.0834028	0.065	0.123	0.00288445	0.184812	0.101409
Paics	7.9842e-05	-0.0833276	0.276	0.354	1	0.567978	0.48465
Cdc40	6.53888e-06	-0.083197	0.118	0.182	0.129862	0.292039	0.208842
Vasp	0.0187354	-0.0831714	0.521	0.572	1	1.04701	0.963837
Skp1a	0.00334808	-0.0831335	0.453	0.519	1	0.877516	0.794383
Apol10b	0.00290002	-0.0829432	0.154	0.2	1	0.398726	0.315783
Zyx	6.27499e-05	-0.0828648	0.393	0.472	1	0.917492	0.834627
Zbtb10	1.90942e-05	-0.0828444	0.083	0.134	0.379211	0.220653	0.137809
Usp8	0.000361673	-0.082764	0.156	0.209	1	0.342892	0.260128
Mysm1	0.000375406	-0.0827347	0.135	0.186	1	0.321972	0.239237
Thoc6	0.000157548	-0.0827146	0.092	0.137	1	0.24122	0.158505
Jmy	2.64282e-05	-0.0827045	0.103	0.158	0.524864	0.270898	0.188193
St3gal5	1.56399e-05	-0.082611	0.078	0.129	0.310608	0.221359	0.138748
Rfc1	2.54351e-05	-0.0825619	0.165	0.231	0.505141	0.381696	0.299134
Dapk2	1.47465e-05	-0.0825066	0.111	0.17	0.292865	0.314803	0.232296
Mosc2	0.00718336	-0.0823233	0.49	0.543	1	0.947141	0.864817
Palmd	0.0175708	-0.082275	0.509	0.573	1	1.11163	1.02935
Creb1	0.00207916	-0.0822207	0.176	0.223	1	0.39152	0.309299
Flot2	4.92661e-05	-0.0821807	0.206	0.276	0.978425	0.435513	0.353332
Ckap4	0.0184336	-0.0821545	0.266	0.303	1	0.539536	0.457382
Ogt	4.03327e-05	-0.0821363	0.15	0.213	0.801008	0.328091	0.245954
Dennd4a	0.00499796	-0.0821315	0.083	0.115	1	0.23976	0.157629
Grcc10	0.00567093	-0.0821071	0.721	0.752	1	1.44765	1.36555
Scaf1	1.87037e-05	-0.0820955	0.163	0.232	0.371456	0.36167	0.279575
Ube3a	0.00027526	-0.0818969	0.278	0.348	1	0.569998	0.488101
Pgcp	0.000131638	-0.0818265	0.089	0.135	1	0.25455	0.172723
Stx17	4.15337e-06	-0.0817182	0.081	0.136	0.082486	0.223827	0.142109
Cdkn1c	0.0241177	-0.081669	0.312	0.361	1	1.01526	0.933592
Eif4g1	0.00106698	-0.0816471	0.388	0.461	1	0.774421	0.692774
Sos1	3.37837e-07	-0.0816162	0.068	0.126	0.00670945	0.202615	0.120999
Tal1	8.5166e-05	-0.0815716	0.138	0.197	1	0.34857	0.266999
Cnot6	1.55948e-06	-0.0815239	0.1	0.164	0.0309712	0.255783	0.174259
Taf1	6.44048e-06	-0.0815009	0.093	0.15	0.127908	0.251363	0.169863
Iffo2	3.1723e-07	-0.0814753	0.082	0.146	0.00630019	0.237656	0.156181
Plekho2	0.00866688	-0.0814592	0.236	0.283	1	0.571212	0.489753
Gnb4	0.00024235	-0.0814189	0.156	0.215	1	0.362179	0.280761
Mesdc2	0.000514928	-0.0813677	0.281	0.348	1	0.557176	0.475808
Dlc1	0.0485363	-0.0813227	0.624	0.664	1	1.32483	1.2435
Fam178a	2.78928e-07	-0.081264	0.09	0.156	0.00553951	0.234584	0.15332
Rbfox2	0.000119048	-0.081261	0.191	0.258	1	0.408253	0.326992
Dnajc10	0.000823995	-0.0811596	0.217	0.275	1	0.449246	0.368086
Srsf10	0.000180547	-0.0811433	0.307	0.389	1	0.619225	0.538082
Taok2	0.000287486	-0.081105	0.284	0.355	1	0.604722	0.523617
AI848100	0.000276126	-0.0810153	0.092	0.136	1	0.234918	0.153903
Tlk1	9.21246e-05	-0.0810083	0.121	0.174	1	0.281148	0.200139
Dhx9	4.79867e-06	-0.0809903	0.117	0.181	0.0953016	0.282097	0.201106
Rpgrip1	3.70237e-05	-0.080721	0.103	0.157	0.73529	0.273161	0.19244
Golgb1	5.90212e-05	-0.0807162	0.204	0.273	1	0.449789	0.369073
Mia3	3.71691e-05	-0.0807137	0.192	0.261	0.738179	0.411308	0.330595
Acbd3	0.000380873	-0.0805162	0.165	0.22	1	0.350577	0.27006
Nid2	1.20925e-06	-0.0801464	0.057	0.107	0.0240157	0.188574	0.108428
Arap2	0.0416489	-0.0801463	0.212	0.241	1	0.555019	0.474872
Fnbp4	7.36303e-06	-0.0801015	0.119	0.182	0.14623	0.28891	0.208808
Smg7	6.66521e-06	-0.080087	0.115	0.178	0.132371	0.281858	0.201771
Stk38	0.00058818	-0.0800756	0.142	0.193	1	0.325769	0.245693
Akap8l	9.19231e-06	-0.0800677	0.145	0.213	0.182559	0.339933	0.259865
Gramd4	9.95071e-10	-0.0800522	0.047	0.108	1.97621e-05	0.16187	0.0818173
Fbxo30	0.00164536	-0.0800238	0.14	0.186	1	0.345363	0.265339
Tet3	3.87723e-05	-0.0799786	0.141	0.203	0.770019	0.327664	0.247686
Spty2d1	6.67624e-05	-0.0799444	0.13	0.188	1	0.311153	0.231209
Cd59a	0.000518174	-0.0799327	0.24	0.305	1	0.639844	0.559911
1810030O07Rik	0.000107635	-0.0799228	0.122	0.175	1	0.294122	0.214199
Tgfbr2	0.00371127	-0.0798912	0.335	0.383	1	0.728065	0.648174
Fos	1.48284e-08	-0.0798464	0.7	0.783	0.000294492	2.98861	2.90876
Gstm2	0.00287498	-0.0798253	0.329	0.389	1	0.699018	0.619192
Ubr3	0.000169156	-0.0797817	0.128	0.182	1	0.291914	0.212133
Tcf3	0.000857707	-0.0796338	0.258	0.324	1	0.538176	0.458542
Clu	0.0441782	-0.0795553	0.408	0.456	1	1.67351	1.59395
Usp47	2.08576e-06	-0.0795167	0.125	0.194	0.0414231	0.290105	0.210588
Magt1	0.00157708	-0.0794962	0.244	0.303	1	0.507441	0.427945
Kcnb1	5.96608e-06	-0.0794	0.061	0.109	0.118486	0.202997	0.123597
Ndufa10	0.000349994	-0.0791108	0.248	0.315	1	0.493877	0.414767
Nup153	1.54305e-05	-0.0790628	0.1	0.156	0.30645	0.24607	0.167007
Fxr1	0.00104654	-0.0789818	0.167	0.218	1	0.371719	0.292737
Alyref	0.00306446	-0.0789465	0.327	0.396	1	0.653122	0.574175
Glg1	6.58677e-05	-0.0788986	0.151	0.212	1	0.349371	0.270472
Usp25	0.00750836	-0.0788531	0.256	0.308	1	0.520335	0.441482
Vprbp	1.17275e-05	-0.0787972	0.079	0.131	0.232909	0.212153	0.133356
Cdc42bpa	3.65097e-05	-0.0787076	0.179	0.249	0.725083	0.395378	0.31667
Dynll2	0.000421577	-0.0786831	0.289	0.358	1	0.588357	0.509673
Enpp2	7.98219e-05	-0.0786377	0.097	0.148	1	0.27778	0.199143
Zcchc14	4.25854e-05	-0.0786054	0.164	0.23	0.845746	0.363761	0.285156
Zfp292	0.00318049	-0.0784836	0.16	0.204	1	0.352824	0.27434
Pdzd8	0.000310627	-0.0784342	0.143	0.196	1	0.324073	0.245639
Parva	3.54647e-05	-0.078318	0.227	0.304	0.704328	0.473701	0.395383
Rasgrp3	0.0261904	-0.0782906	0.381	0.432	1	0.874619	0.796328
Zc3h7a	0.000150947	-0.0782734	0.167	0.227	1	0.364427	0.286154
Dnajc21	0.000199087	-0.0782104	0.112	0.162	1	0.272911	0.1947
Prelp	1.5594e-05	-0.0781551	0.113	0.173	0.309696	0.401032	0.322876
Plcb4	0.00065707	-0.0781506	0.168	0.222	1	0.384556	0.306406
Slc25a25	0.000589873	-0.0781209	0.165	0.221	1	0.403955	0.325834
Gpbp1l1	0.00033034	-0.078031	0.174	0.232	1	0.369528	0.291497
Rnmt	1.84721e-05	-0.0780274	0.069	0.116	0.366856	0.185944	0.107917
Coro1c	0.000545302	-0.0779682	0.271	0.336	1	0.556635	0.478667
Pik3r3	0.000257234	-0.0779255	0.076	0.118	1	0.217111	0.139185
Prkx	0.00134152	-0.0779003	0.201	0.253	1	0.417565	0.339665
Las1l	1.64964e-05	-0.0778782	0.114	0.174	0.327618	0.283271	0.205393
Lats2	0.00278217	-0.077818	0.309	0.369	1	0.610806	0.532988
Supt6h	0.000687607	-0.0777957	0.157	0.209	1	0.347197	0.269402
Ppp1r14b	0.000421184	-0.0777378	0.182	0.239	1	0.419087	0.341349
Tmem87b	2.31642e-05	-0.0777304	0.12	0.18	0.46004	0.289256	0.211526
Usp16	0.000749124	-0.0777276	0.117	0.163	1	0.273694	0.195967
Ammecr1l	3.99966e-05	-0.0776554	0.132	0.193	0.794333	0.307303	0.229648
E030024N20Rik	4.17018e-05	-0.0776538	0.071	0.116	0.828198	0.18958	0.111926
Akap13	0.00353853	-0.077636	0.36	0.417	1	0.775479	0.697843
Ubr5	0.000624349	-0.0773878	0.188	0.245	1	0.389891	0.312504
Stim1	1.48256e-08	-0.0773684	0.05	0.108	0.000294437	0.160446	0.0830779
Mtdh	0.000560037	-0.0773421	0.485	0.573	1	0.990026	0.912684
Mecp2	1.7945e-05	-0.0772672	0.186	0.261	0.356387	0.40158	0.324312
Ctcf	0.00434446	-0.0772207	0.247	0.301	1	0.511917	0.434696
Creb3l2	6.36249e-06	-0.0771987	0.06	0.107	0.126359	0.182886	0.105687
2200002D01Rik	0.000275105	-0.0770203	0.206	0.271	1	0.605415	0.528395
1110028C15Rik	0.00151433	-0.0770001	0.083	0.12	1	0.21817	0.14117
Osbpl11	3.12483e-05	-0.0769915	0.082	0.132	0.620592	0.219848	0.142857
Med13	0.000196046	-0.0769491	0.142	0.198	1	0.322022	0.245073
Hspa4	0.000300164	-0.076885	0.283	0.354	1	0.560967	0.484082
Asap1	0.118075	-0.0768782	0.274	0.3	1	0.568794	0.491916
Tanc2	2.76691e-09	-0.0768348	0.047	0.107	5.49508e-05	0.174342	0.097507
Mphosph8	1.09412e-05	-0.0767543	0.199	0.28	0.217293	0.453874	0.37712
Nktr	0.000147989	-0.0766996	0.18	0.243	1	0.387419	0.310719
Gabpb2	6.15333e-06	-0.0765877	0.07	0.121	0.122205	0.193683	0.117096
Rpl6	9.5741e-06	-0.0765602	0.994	0.994	0.190142	2.98679	2.91023
Psmb9	0.121758	-0.0764495	0.531	0.558	1	1.07385	0.9974
Dhx15	0.000550381	-0.0764461	0.288	0.357	1	0.566747	0.490301
Smg6	1.06995e-06	-0.076417	0.1	0.165	0.0212492	0.257986	0.181569
Rab3gap1	8.73429e-05	-0.0763899	0.094	0.143	1	0.234736	0.158346
Apbb2	0.00411191	-0.0763869	0.409	0.473	1	0.836861	0.760475
Plscr4	0.00155185	-0.0763569	0.306	0.372	1	0.631324	0.554967
Prcp	0.0985465	-0.0762956	0.307	0.334	1	0.646563	0.570267
Rnf168	1.16227e-05	-0.0761321	0.072	0.121	0.230827	0.206225	0.130093
Ubtf	0.000211508	-0.0760875	0.259	0.333	1	0.527265	0.451178
Fert2	2.24228e-05	-0.0760157	0.066	0.112	0.445318	0.200492	0.124477
Cobll1	5.96508e-05	-0.0759853	0.062	0.104	1	0.173898	0.0979125
Rrm2b	0.00054776	-0.0759553	0.089	0.131	1	0.229453	0.153498
Tmem30a	0.0019648	-0.0758858	0.527	0.59	1	0.991945	0.916059
Sncg	0.000972448	-0.0758172	0.339	0.413	1	0.986923	0.911106
Rnf6	5.27456e-05	-0.0757969	0.184	0.252	1	0.39664	0.320843
Glyr1	0.000560046	-0.0756884	0.252	0.316	1	0.518451	0.442763
Mfap1a	0.00016844	-0.075675	0.253	0.327	1	0.531992	0.456317
Scaper	2.03217e-06	-0.0755778	0.062	0.114	0.0403589	0.182921	0.107344
Camsap2	8.73701e-05	-0.0755208	0.13	0.187	1	0.298999	0.223478
Kdm3a	4.15212e-05	-0.0754118	0.082	0.13	0.824611	0.216127	0.140716
Asxl2	0.000107179	-0.0753645	0.13	0.186	1	0.301002	0.225637
Tcf12	1.3338e-05	-0.0753568	0.146	0.213	0.264893	0.324658	0.249301
2610101N10Rik	0.000506842	-0.0753077	0.284	0.352	1	0.582206	0.506899
Asph	1.24102e-06	-0.0752291	0.074	0.131	0.0246467	0.196295	0.121066
Slc12a2	4.23671e-06	-0.075207	0.074	0.128	0.0841411	0.217912	0.142705
Efnb2	0.0571336	-0.075198	0.365	0.401	1	0.840195	0.764997
D14Ertd449e	1.28553e-06	-0.0750995	0.16	0.239	0.0255307	0.374708	0.299609
Mbtps1	0.00338122	-0.0750409	0.183	0.23	1	0.378797	0.303757
Zfp664	0.000162385	-0.0750105	0.199	0.263	1	0.419142	0.344132
Gabarapl1	0.133771	-0.0749946	0.529	0.554	1	1.11822	1.04322
Sp3	0.00193023	-0.074951	0.239	0.292	1	0.492294	0.417343
Wac	0.00762733	-0.0749356	0.371	0.429	1	0.705119	0.630183
Fat4	9.82903e-08	-0.0749035	0.06	0.119	0.00195205	0.18452	0.109617
Ehmt1	5.84519e-05	-0.0748306	0.131	0.19	1	0.295497	0.220667
Kpna4	0.000291466	-0.0748033	0.27	0.342	1	0.546024	0.471221
Matr3	0.0036587	-0.0747036	0.363	0.43	1	0.701146	0.626442
Rpl39	1.5797e-06	-0.0746969	0.986	0.992	0.0313728	3.04952	2.97483
H1f0	0.0508004	-0.0746683	0.429	0.464	1	0.99934	0.924672
Ubxn2a	0.000720075	-0.0745918	0.218	0.278	1	0.46021	0.385618
Xpo7	0.000102883	-0.0745798	0.106	0.158	1	0.248994	0.174414
Maged1	0.0146151	-0.0745072	0.283	0.332	1	0.593685	0.519178
Pdgfa	0.000857462	-0.0744271	0.071	0.107	1	0.231914	0.157487
Gm6548	0.000323687	-0.0744077	0.108	0.155	1	0.248209	0.173802
Etf1	0.0862773	-0.0743621	0.349	0.386	1	0.695937	0.621575
Clcn3	1.02729e-06	-0.0742638	0.11	0.18	0.020402	0.281629	0.207365
Clint1	0.000483008	-0.0742242	0.181	0.238	1	0.38501	0.310786
Lysmd3	1.41224e-05	-0.0741836	0.065	0.112	0.28047	0.189039	0.114855
Zfp703	0.00624059	-0.0741805	0.122	0.16	1	0.376538	0.302358
Setd7	1.62959e-05	-0.0740601	0.118	0.179	0.323637	0.283996	0.209936
Gmds	6.1618e-05	-0.0739894	0.113	0.167	1	0.271415	0.197425
Ubn2	8.58433e-05	-0.0739531	0.197	0.266	1	0.423278	0.349325
Mob3c	0.0151071	-0.0738077	0.169	0.206	1	0.404929	0.331121
2510006D16Rik	0.00140466	-0.0737864	0.363	0.429	1	0.716461	0.642675
Son	3.89818e-05	-0.0737694	0.811	0.875	0.774178	1.73008	1.65631
Ppfia1	0.000104816	-0.0736666	0.1	0.15	1	0.238829	0.165162
Specc1l	9.17045e-05	-0.073644	0.111	0.163	1	0.258942	0.185298
Pi4k2a	9.8763e-07	-0.0736363	0.07	0.126	0.0196143	0.196666	0.12303
Atg2a	4.58452e-05	-0.0736104	0.086	0.135	0.910486	0.224273	0.150662
Lima1	0.0232243	-0.0735059	0.379	0.425	1	0.756304	0.682798
Fhl1	5.89999e-05	-0.0734562	0.329	0.413	1	0.767715	0.694259
Dicer1	5.08169e-06	-0.0733774	0.103	0.163	0.100922	0.244448	0.171071
Vim	0.0101334	-0.0732857	0.897	0.923	1	2.92708	2.85379
Gnl3	0.00715363	-0.0732396	0.174	0.216	1	0.392907	0.319667
Fgfr1	0.00784208	-0.0732238	0.12	0.157	1	0.291865	0.218642
Pola2	1.8725e-05	-0.0732231	0.153	0.223	0.371878	0.372747	0.299523
Zbtb38	7.91396e-05	-0.0732052	0.064	0.106	1	0.188273	0.115068
Csnk1d	0.00628061	-0.0731997	0.33	0.386	1	0.643261	0.570061
Supt5h	0.000327828	-0.0731595	0.197	0.259	1	0.408341	0.335182
Tnip1	0.1356	-0.0731191	0.169	0.189	1	0.425756	0.352637
Rpl41	1.11515e-07	-0.0731023	1	1	0.00221469	3.97019	3.89709
Gatad2b	0.00111973	-0.0730261	0.093	0.132	1	0.235178	0.162152
Zfp281	0.00898364	-0.0729923	0.162	0.201	1	0.355789	0.282797
Snhg3	0.00131253	-0.0729618	0.252	0.312	1	0.550764	0.477802
Pde8a	4.95356e-05	-0.0728888	0.063	0.105	0.983777	0.180065	0.107176
Cdk2ap1	0.00216077	-0.0728607	0.257	0.314	1	0.511409	0.438548
Slc29a1	0.00833256	-0.0728405	0.363	0.417	1	0.737212	0.664371
Wdr33	0.00144896	-0.072824	0.26	0.322	1	0.511884	0.43906
Oxct1	0.0066491	-0.0728182	0.164	0.206	1	0.358926	0.286108
2810453I06Rik	0.00602247	-0.0727812	0.165	0.207	1	0.353323	0.280541
Rere	0.00104727	-0.0727607	0.188	0.241	1	0.390672	0.317912
Dach1	0.00367096	-0.0727427	0.162	0.204	1	0.383416	0.310673
Ppp3cb	0.00102867	-0.0726655	0.085	0.123	1	0.202889	0.130223
Pum1	0.000936186	-0.0726478	0.239	0.298	1	0.474706	0.402058
Usp7	1.02538e-05	-0.0725899	0.152	0.223	0.20364	0.336556	0.263966
Anapc1	0.000308545	-0.0725826	0.139	0.192	1	0.300683	0.2281
Lin7c	0.000499356	-0.0725458	0.197	0.256	1	0.404659	0.332113
Dusp3	0.00360749	-0.0723861	0.655	0.711	1	1.45473	1.38235
Nfix	9.83021e-06	-0.0722107	0.072	0.122	0.195228	0.192816	0.120605
Ccdc25	0.000444747	-0.0721894	0.138	0.19	1	0.318494	0.246305
Ccnyl1	0.00288459	-0.0721661	0.147	0.192	1	0.34928	0.277114
Tnrc18	1.46662e-05	-0.0721473	0.134	0.199	0.291271	0.296124	0.223977
Spen	0.00351443	-0.0720809	0.141	0.184	1	0.314835	0.242754
Ube2w	0.00246663	-0.0720572	0.19	0.237	1	0.389198	0.317141
Rcl1	0.000552601	-0.0720482	0.073	0.11	1	0.193591	0.121543
Fam116a	0.00154722	-0.0720436	0.151	0.199	1	0.331206	0.259163
Hnrnpa3	0.000516322	-0.0720416	0.626	0.709	1	1.26227	1.19023
Jarid2	0.000625798	-0.0720378	0.099	0.141	1	0.234565	0.162527
Rnf167	0.000616357	-0.0720349	0.281	0.352	1	0.56138	0.489345
Slain2	6.20274e-05	-0.0720227	0.211	0.284	1	0.451349	0.379326
Twistnb	0.00295133	-0.0720172	0.189	0.236	1	0.391121	0.319103
Cst3	8.99984e-06	-0.0719784	0.989	0.996	0.178737	3.2295	3.15752
Id2	0.0396345	-0.0719556	0.386	0.426	1	1.02225	0.950297
Ivns1abp	0.000231239	-0.0719008	0.232	0.299	1	0.529185	0.457284
Mgat4a	9.31135e-06	-0.0718401	0.103	0.162	0.184923	0.268909	0.197069
Taf7	0.00410777	-0.0718392	0.292	0.353	1	0.619782	0.547943
Epha2	0.000957697	-0.0718107	0.182	0.235	1	0.422062	0.350251
Msx1	0.0110741	-0.0716878	0.177	0.22	1	0.463907	0.39222
Nrd1	6.3056e-06	-0.0716472	0.217	0.303	0.125229	0.463882	0.392235
Sept11	0.0271669	-0.0716425	0.209	0.244	1	0.4523	0.380657
Daxx	0.0277758	-0.0716025	0.194	0.229	1	0.411083	0.33948
Axl	0.0112722	-0.0715709	0.078	0.106	1	0.218325	0.146755
Cuedc1	0.000336515	-0.0715327	0.168	0.226	1	0.368505	0.296972
Arid4a	0.000181226	-0.0714282	0.206	0.27	1	0.435232	0.363804
Dnajc13	6.74852e-06	-0.0714227	0.099	0.158	0.134026	0.234357	0.162934
Armcx2	0.000124408	-0.0712917	0.084	0.13	1	0.210989	0.139697
Pip4k2a	0.0162232	-0.0712716	0.105	0.135	1	0.256747	0.185475
Kank2	5.7351e-05	-0.0712623	0.084	0.133	1	0.211659	0.140396
Adamts5	7.33048e-05	-0.0711995	0.072	0.118	1	0.238761	0.167562
Gm14207	0.000361447	-0.0711112	0.086	0.128	1	0.231632	0.160521
Mllt4	0.0456448	-0.071097	0.463	0.513	1	1.00068	0.929581
Stk10	0.000280165	-0.0710797	0.099	0.144	1	0.226334	0.155254
Atp2a3	0.264074	-0.0710781	0.223	0.236	1	0.554776	0.483698
Tgs1	0.00234652	-0.0709748	0.143	0.187	1	0.311769	0.240794
BC005537	1.3048e-05	-0.0709579	0.059	0.104	0.259133	0.162092	0.0911342
Gpd2	0.0132496	-0.0709069	0.147	0.182	1	0.326468	0.255562
Pla2g16	0.0011585	-0.0708617	0.386	0.46	1	0.780525	0.709664
Txlna	0.0012632	-0.0708545	0.216	0.273	1	0.445863	0.375009
Kdm3b	1.28671e-05	-0.070834	0.079	0.13	0.255541	0.201253	0.130419
Hipk3	0.00115201	-0.0708297	0.229	0.29	1	0.475948	0.405119
Tmem110	0.000614085	-0.0708295	0.151	0.205	1	0.332443	0.261613
C80913	3.09951e-05	-0.0707971	0.115	0.174	0.615562	0.275121	0.204324
Zc3h15	0.001238	-0.0707563	0.291	0.357	1	0.580247	0.50949
Myo1d	0.000736362	-0.0707418	0.137	0.186	1	0.310531	0.23979
Nova2	0.00407181	-0.0706941	0.231	0.281	1	0.483987	0.413293
March7	0.000256912	-0.0706768	0.107	0.155	1	0.244753	0.174076
Fam171a1	0.00467771	-0.0706483	0.219	0.267	1	0.465222	0.394573
Csda	0.0169923	-0.0706161	0.304	0.355	1	0.624831	0.554214
Pcif1	0.000400489	-0.070597	0.219	0.284	1	0.443445	0.372848
Hivep2	5.02964e-07	-0.0705523	0.079	0.139	0.00998887	0.208666	0.138114
Fndc3b	0.000839053	-0.0705322	0.189	0.245	1	0.39073	0.320198
Araf	0.000593104	-0.0703795	0.18	0.237	1	0.385641	0.315261
Bok	0.0132799	-0.070326	0.142	0.179	1	0.358065	0.287739
Papola	0.00148447	-0.0702954	0.382	0.451	1	0.735981	0.665685
Cdk11b	0.000671382	-0.0702711	0.254	0.32	1	0.52286	0.452589
Smad2	0.00025408	-0.0702293	0.131	0.184	1	0.298022	0.227793
Klhl4	8.67472e-05	-0.070171	0.075	0.121	1	0.204838	0.134667
Zfp948	0.00044798	-0.0701257	0.085	0.127	1	0.220937	0.150812
Smc3	0.000159918	-0.0700801	0.232	0.304	1	0.493067	0.422987
Tecpr1	0.00310002	-0.0700792	0.255	0.313	1	0.522886	0.452806
Nek6	4.07106e-06	-0.070059	0.058	0.106	0.0808513	0.170145	0.100086
Usp12	0.000176861	-0.0700352	0.129	0.184	1	0.290002	0.219967
Rc3h2	0.00035154	-0.0700039	0.098	0.142	1	0.219218	0.149214
Ece1	0.000478863	-0.069986	0.75	0.8	1	1.67001	1.60002
Rapgef2	0.0164002	-0.0699591	0.149	0.183	1	0.325414	0.255455
Trim25	0.0599415	-0.0699582	0.286	0.322	1	0.608251	0.538293
Dtx3	0.00135887	-0.069841	0.169	0.223	1	0.36687	0.297029
Nf1	0.000315932	-0.0698368	0.081	0.123	1	0.205787	0.135951
Bcl2l11	0.00509982	-0.0698054	0.103	0.137	1	0.250096	0.180291
Srp72	0.00179067	-0.0697976	0.245	0.303	1	0.491128	0.42133
Ssr1	0.00206742	-0.0697683	0.438	0.513	1	0.835169	0.7654
Anxa6	0.000699435	-0.069703	0.338	0.409	1	0.703338	0.633635
Csrp1	0.439508	-0.0696015	0.721	0.719	1	1.58305	1.51345
Pja2	6.92812e-05	-0.0695989	0.231	0.308	1	0.479248	0.40965
Rell1	0.268658	-0.069564	0.336	0.36	1	0.773957	0.704393
Rprd2	8.41412e-05	-0.0694987	0.118	0.173	1	0.271772	0.202274
Prps2	5.87309e-05	-0.0694247	0.082	0.13	1	0.20588	0.136455
Tln2	0.000126112	-0.0693833	0.075	0.119	1	0.207821	0.138437
Gbas	0.00037454	-0.0693466	0.169	0.228	1	0.367727	0.298381
2400003C14Rik	0.0029893	-0.0692989	0.204	0.254	1	0.408687	0.339388
Cebpz	0.000339494	-0.0692833	0.219	0.284	1	0.466627	0.397343
Mir1931	0.00238581	-0.0691841	0.125	0.167	1	0.298925	0.229741
Exosc2	0.014129	-0.0691207	0.09	0.119	1	0.274964	0.205843
Prpf6	0.000380338	-0.0691015	0.143	0.197	1	0.308542	0.239441
Chmp3	0.00505305	-0.0690324	0.456	0.519	1	0.861988	0.792955
Phpt1	0.00354345	-0.068994	0.25	0.304	1	0.512339	0.443345
Ing5	5.1478e-06	-0.0689252	0.074	0.127	0.102235	0.20467	0.135745
Rybp	0.00132561	-0.0689017	0.147	0.195	1	0.330458	0.261556
Agps	0.00173231	-0.0688346	0.083	0.119	1	0.195253	0.126419
Ubp1	1.60706e-05	-0.0688185	0.12	0.181	0.319162	0.275107	0.206289
Tmem164	3.15512e-05	-0.0687711	0.078	0.126	0.626606	0.193061	0.12429
Hnrnpr	0.00466116	-0.0686801	0.299	0.359	1	0.600793	0.532113
Shoc2	0.000181081	-0.0685871	0.179	0.24	1	0.380353	0.311766
Tfdp2	1.39722e-05	-0.068534	0.07	0.12	0.277487	0.200382	0.131848
Fyttd1	0.0112618	-0.0685331	0.208	0.25	1	0.419152	0.350619
Wdr44	8.97096e-05	-0.0685068	0.069	0.112	1	0.181048	0.112541
Arhgef2	0.00130685	-0.0684656	0.285	0.352	1	0.570246	0.501781
Sel1l	0.000549592	-0.0684548	0.206	0.268	1	0.416375	0.34792
Arntl	2.41819e-05	-0.0683782	0.101	0.157	0.480253	0.250823	0.182445
Larp1b	3.37516e-05	-0.0683673	0.078	0.126	0.670306	0.203395	0.135028
Esyt2	0.00978046	-0.0683175	0.205	0.251	1	0.437581	0.369263
Ptrf	0.0213098	-0.0682863	0.889	0.913	1	2.41505	2.34676
Shank3	0.000733074	-0.0682549	0.1	0.143	1	0.243534	0.175279
Chd9	4.12377e-05	-0.0682463	0.106	0.161	0.818982	0.267831	0.199585
Rnf19b	0.0160922	-0.068194	0.18	0.219	1	0.511815	0.443621
Rnf216	0.000464604	-0.0681794	0.148	0.202	1	0.327026	0.258846
Ikzf5	0.00301101	-0.06813	0.117	0.157	1	0.272531	0.204401
Raph1	0.0159772	-0.0680999	0.289	0.337	1	0.617283	0.549183
Ehmt2	0.00167622	-0.0680648	0.157	0.205	1	0.328129	0.260065
Mnda	0.0693221	-0.0680126	0.091	0.111	1	0.257034	0.189022
Hmgb3	2.81382e-07	-0.0679426	0.061	0.117	0.00558825	0.177703	0.10976
4933411K20Rik	1.50814e-05	-0.0679295	0.062	0.108	0.299518	0.184276	0.116347
Tardbp	0.000614082	-0.0679071	0.256	0.32	1	0.51548	0.447573
Pdlim7	0.0233336	-0.0679055	0.328	0.377	1	0.673927	0.606022
Tm9sf2	0.00273258	-0.0678674	0.417	0.486	1	0.793652	0.725785
Erlin2	5.7065e-05	-0.0678184	0.09	0.139	1	0.219553	0.151734
Tm6sf1	0.00522433	-0.0677726	0.286	0.342	1	0.61682	0.549047
Zranb2	0.00956507	-0.0676606	0.213	0.257	1	0.437498	0.369837
Gns	0.00108596	-0.0675755	0.177	0.232	1	0.38206	0.314485
Otud1	0.03365	-0.067499	0.104	0.131	1	0.263228	0.195729
Tuba1c	0.0117367	-0.0674965	0.194	0.236	1	0.560416	0.492919
Ppp2r5e	0.000171832	-0.0674243	0.157	0.217	1	0.340397	0.272973
Rpl36	5.79737e-05	-0.0673005	0.988	0.992	1	2.98355	2.91625
Nacc2	0.00105422	-0.0672861	0.097	0.138	1	0.235502	0.168216
Adcy6	1.77746e-05	-0.0672533	0.075	0.125	0.353004	0.19622	0.128967
Slc24a5	0.000747233	-0.0672072	0.077	0.115	1	0.203161	0.135954
Snrpg	0.000886762	-0.0672048	0.799	0.829	1	1.62262	1.55542
2010106G01Rik	0.00186372	-0.0671128	0.259	0.321	1	0.513424	0.446311
Med16	4.23366e-05	-0.0671121	0.066	0.11	0.840804	0.184074	0.116962
Cbx5	0.000197368	-0.0670986	0.164	0.225	1	0.348216	0.281118
Stat1	0.00380646	-0.0670359	0.236	0.293	1	0.513663	0.446627
Tmem185b	0.00103814	-0.0669888	0.141	0.19	1	0.31848	0.251491
Chst7	0.000178233	-0.0669624	0.101	0.152	1	0.269979	0.203017
Crybg3	0.000579949	-0.0669578	0.143	0.194	1	0.309328	0.24237
Dleu2	0.00294156	-0.0669121	0.236	0.29	1	0.520794	0.453882
Pan3	0.00203566	-0.066865	0.133	0.178	1	0.301423	0.234558
Zdhhc17	0.0171365	-0.0668474	0.117	0.148	1	0.26296	0.196113
Erlec1	0.00419915	-0.0667486	0.194	0.245	1	0.42064	0.353891
Appl1	0.000483982	-0.0667139	0.174	0.23	1	0.370407	0.303693
Agap1	0.00128836	-0.0667106	0.108	0.152	1	0.26295	0.196239
Ier5l	0.000129664	-0.0667093	0.081	0.127	1	0.226708	0.159999
Zmym4	6.47751e-06	-0.0667092	0.073	0.126	0.128643	0.193652	0.126943
Far1	0.000210587	-0.0666703	0.078	0.121	1	0.195497	0.128827
Fkbp9	0.0232672	-0.0666007	0.383	0.432	1	0.732503	0.665903
Tmem98	1.12607e-05	-0.0665819	0.066	0.115	0.223638	0.178438	0.111856
Arid5b	0.12236	-0.0665712	0.502	0.54	1	1.06881	1.00224
Slc35b2	1.66187e-06	-0.0665667	0.103	0.168	0.0330048	0.237459	0.170893
Tmem64	4.95232e-07	-0.0665443	0.111	0.183	0.00983531	0.276622	0.210078
Gxylt1	0.000722034	-0.0663647	0.098	0.141	1	0.224565	0.158201
Ahcyl1	0.000199136	-0.0663161	0.136	0.193	1	0.304672	0.238356
Pppde1	0.0007619	-0.0662417	0.173	0.226	1	0.364751	0.298509
Rps7	0.00176538	-0.0662403	0.989	0.991	1	2.99504	2.9288
Triobp	0.129009	-0.0662092	0.464	0.487	1	0.882571	0.816362
Tmed5	0.0562213	-0.0661953	0.55	0.594	1	1.10071	1.03451
2210018M11Rik	0.00026054	-0.0661145	0.096	0.142	1	0.230491	0.164377
Zfp871	0.0017931	-0.0661013	0.161	0.211	1	0.329778	0.263677
Mbtd1	0.000181021	-0.0660528	0.117	0.17	1	0.268536	0.202483
Ccdc90a	0.00851545	-0.066028	0.152	0.19	1	0.319816	0.253788
Wdr45l	0.000299513	-0.0660099	0.205	0.27	1	0.415991	0.349981
Man1c1	4.55274e-05	-0.0659708	0.097	0.15	0.904174	0.236947	0.170976
Blvrb	0.0104601	-0.0659639	0.232	0.279	1	0.4918	0.425837
Ephx1	0.0017113	-0.0659557	0.272	0.337	1	0.597555	0.5316
Srek1	0.000204567	-0.0658956	0.133	0.187	1	0.296515	0.23062
Cul5	0.000199671	-0.0658205	0.125	0.178	1	0.286971	0.22115
Hmgcr	2.0793e-05	-0.0658184	0.061	0.106	0.412949	0.175535	0.109716
Trip6	6.42704e-06	-0.0658047	0.08	0.135	0.127641	0.216844	0.151039
Plxna4	1.338e-05	-0.0657991	0.078	0.129	0.265726	0.20023	0.134431
Arhgap23	0.00044743	-0.065791	0.189	0.249	1	0.395138	0.329347
Fam172a	0.000738012	-0.0657426	0.095	0.137	1	0.230629	0.164886
Sh3d19	3.17071e-05	-0.0657326	0.065	0.11	0.629703	0.187969	0.122236
Dopey1	0.000544126	-0.0656797	0.07	0.107	1	0.185909	0.12023
Magi3	0.000865404	-0.0656726	0.08	0.119	1	0.199993	0.134321
Zmynd11	0.00608373	-0.0656541	0.347	0.406	1	0.673873	0.608219
Gstt2	0.050688	-0.0655397	0.221	0.255	1	0.51368	0.44814
Kidins220	0.000553714	-0.0653946	0.134	0.184	1	0.285136	0.219742
Cyb5b	0.00785224	-0.0653926	0.26	0.309	1	0.508849	0.443457
Yrdc	0.00350553	-0.0653058	0.313	0.37	1	0.602142	0.536837
Ccl2	0.000929501	-0.0652554	0.111	0.069	1	0.465821	0.400565
Vps4b	0.00137188	-0.065221	0.243	0.305	1	0.481555	0.416334
Eif2a	0.00275487	-0.0651762	0.226	0.28	1	0.444269	0.379093
Cux1	0.000906489	-0.0650909	0.172	0.226	1	0.364144	0.299053
Seh1l	0.00205743	-0.0650712	0.194	0.246	1	0.394022	0.32895
Etv3	0.000412495	-0.0650127	0.114	0.162	1	0.262608	0.197596
Gtf2a1	0.000741494	-0.0649375	0.117	0.163	1	0.26503	0.200092
Gnl3l	0.000405499	-0.0649107	0.094	0.138	1	0.216897	0.151986
Ngfrap1	0.00207912	-0.0648796	0.209	0.265	1	0.438357	0.373477
Gigyf1	0.000950607	-0.0648574	0.13	0.179	1	0.271349	0.206491
Otud7b	0.00168084	-0.0647599	0.14	0.187	1	0.309032	0.244273
Lsm5	0.00407892	-0.0647199	0.357	0.419	1	0.658495	0.593775
Cdk9	0.0145841	-0.0646968	0.305	0.352	1	0.596145	0.531448
Camk2d	0.000428285	-0.0645814	0.231	0.298	1	0.465825	0.401243
Ugcg	0.0083958	-0.0645687	0.214	0.26	1	0.466988	0.402419
St3gal2	0.0103837	-0.0645214	0.134	0.169	1	0.301381	0.23686
Sncaip	0.000582889	-0.0644837	0.132	0.183	1	0.314645	0.250161
Wasl	0.00120435	-0.0644722	0.304	0.375	1	0.594201	0.529729
2310010J17Rik	0.000181312	-0.0644204	0.099	0.148	1	0.252019	0.187599
Fam69a	0.00162004	-0.0643482	0.105	0.146	1	0.247121	0.182772
Hspa9	0.0299604	-0.0642785	0.368	0.408	1	0.699578	0.6353
Myo9a	0.000171511	-0.0642517	0.074	0.117	1	0.182647	0.118396
Dnajc7	0.00528297	-0.0641828	0.319	0.378	1	0.621881	0.557698
Spop	0.0550019	-0.0641718	0.565	0.596	1	1.10594	1.04176
Hadha	0.000881559	-0.0641566	0.234	0.298	1	0.469662	0.405506
Zfp280d	1.92343e-05	-0.0641162	0.078	0.128	0.381993	0.197836	0.13372
Zranb1	0.000261254	-0.0640058	0.087	0.131	1	0.209722	0.145716
Smarcd1	0.000464061	-0.0639522	0.112	0.16	1	0.258762	0.19481
Mospd1	9.96724e-05	-0.0638053	0.061	0.101	1	0.170449	0.106644
Utp3	0.00445382	-0.0637899	0.244	0.299	1	0.47964	0.415851
Apbb1	0.000114744	-0.0637669	0.072	0.116	1	0.197242	0.133475
Zfp608	0.00326847	-0.0635324	0.103	0.14	1	0.262786	0.199254
Ppic	0.0220935	-0.0635115	0.48	0.527	1	0.938525	0.875014
Kifap3	0.00324266	-0.0634448	0.141	0.184	1	0.303412	0.239967
Cyr61	4.63683e-08	-0.0633883	0.377	0.495	0.000920874	1.58011	1.51672
Trim44	0.00216252	-0.0632926	0.156	0.204	1	0.322269	0.258976
Sept7	0.0368501	-0.0632922	0.631	0.685	1	1.23181	1.16852
Cep110	0.00038715	-0.0632554	0.075	0.116	1	0.195129	0.131874
Rin2	0.00839566	-0.0631228	0.177	0.22	1	0.380047	0.316924
Whsc1	0.000189249	-0.0630961	0.065	0.104	1	0.161828	0.0987322
Stard13	0.000379124	-0.0630318	0.105	0.153	1	0.257838	0.194806
9130011J15Rik	0.0223837	-0.0629567	0.379	0.429	1	0.708061	0.645104
Dgke	0.00179372	-0.0629372	0.074	0.108	1	0.205995	0.143058
B4galt5	0.00735056	-0.0628927	0.106	0.14	1	0.255512	0.19262
Ralgapa2	0.000925623	-0.0628444	0.096	0.137	1	0.242089	0.179245
Vegfa	0.680931	-0.062803	0.162	0.165	1	0.432436	0.369633
Yme1l1	0.00509496	-0.0627407	0.216	0.266	1	0.448056	0.385315
Gstm5	5.06872e-06	-0.0627019	0.057	0.105	0.100665	0.173261	0.110559
Hk1	0.0396547	-0.0626885	0.264	0.302	1	0.513993	0.451305
Myst4	1.0395e-05	-0.0626211	0.062	0.109	0.206444	0.172572	0.109951
Pten	0.00153778	-0.0625995	0.305	0.373	1	0.594341	0.531742
Tmem106c	2.09729e-06	-0.0625633	0.066	0.12	0.0416522	0.175765	0.113202
Clasp1	0.000411392	-0.0625326	0.089	0.132	1	0.215741	0.153208
Trove2	0.000309506	-0.0625211	0.187	0.252	1	0.402527	0.340006
Svil	0.00824775	-0.0624614	0.113	0.147	1	0.229807	0.167345
Man1a	0.000269588	-0.0622049	0.077	0.119	1	0.196313	0.134108
Akirin1	0.0189514	-0.0622014	0.291	0.34	1	0.552171	0.489969
Cltc	0.000615527	-0.0621923	0.426	0.512	1	0.830327	0.768135
Chd6	0.000790798	-0.0621845	0.17	0.227	1	0.370906	0.308722
Nom1	1.58131e-05	-0.0621035	0.096	0.153	0.314049	0.233874	0.17177
Ctr9	7.16346e-05	-0.0620981	0.065	0.108	1	0.177834	0.115736
Gtf3c2	4.97077e-05	-0.0620532	0.153	0.218	0.987194	0.323188	0.261135
Arhgap1	0.000753278	-0.0619912	0.159	0.213	1	0.322749	0.260758
Ino80	0.00356416	-0.0619357	0.083	0.118	1	0.202315	0.140379
Rcn2	0.00757274	-0.0618873	0.405	0.469	1	0.76462	0.702732
Fam160b1	0.000535321	-0.0618729	0.111	0.158	1	0.254268	0.192395
Ndrg2	7.1032e-06	-0.0617825	0.07	0.121	0.14107	0.234431	0.172649
Appbp2	0.000211065	-0.0617493	0.098	0.147	1	0.229179	0.167429
Limd1	0.00514899	-0.0617417	0.157	0.2	1	0.329894	0.268152
Zcchc17	0.00995129	-0.0617169	0.242	0.291	1	0.488413	0.426696
Dcaf17	0.00550995	-0.0616921	0.124	0.162	1	0.291333	0.229641
Plaa	0.00144317	-0.0616421	0.125	0.17	1	0.267132	0.20549
Cep57	0.00360317	-0.0616388	0.099	0.135	1	0.234305	0.172667
Naa35	0.00095511	-0.061559	0.122	0.168	1	0.27631	0.214751
Acat1	0.0194153	-0.061554	0.285	0.329	1	0.536964	0.47541
Dyrk1a	2.48352e-05	-0.0614687	0.111	0.17	0.493227	0.256124	0.194655
Ssbp2	8.30906e-06	-0.0614668	0.061	0.108	0.165018	0.170739	0.109272
Ptk2	0.00200147	-0.0613587	0.259	0.32	1	0.511653	0.450294
5133401N09Rik	0.0813606	-0.0613159	0.339	0.374	1	0.639706	0.57839
Mark3	0.000582561	-0.061277	0.211	0.275	1	0.422984	0.361707
Foxj2	0.00173648	-0.0612702	0.128	0.171	1	0.277483	0.216213
Wwp1	0.000106028	-0.0612532	0.081	0.127	1	0.208512	0.147259
Pisd-ps3	0.029227	-0.0611956	0.304	0.351	1	0.643244	0.582048
B230208H17Rik	0.00136992	-0.061146	0.152	0.201	1	0.325082	0.263936
Pcbd2	0.00171001	-0.0610836	0.264	0.325	1	0.517611	0.456528
Vamp7	0.162276	-0.0610425	0.169	0.188	1	0.335384	0.274342
Arrdc3	0.408352	-0.0610028	0.117	0.128	1	0.289183	0.22818
Fam55d	0.019598	-0.0609407	0.191	0.229	1	0.427023	0.366082
Prpf39	5.269e-05	-0.060893	0.101	0.155	1	0.240286	0.179393
Dmxl1	7.80407e-05	-0.0608386	0.084	0.133	1	0.212338	0.151499
Fam179b	5.074e-05	-0.0608245	0.071	0.118	1	0.185495	0.12467
Maff	0.209195	-0.0608083	0.393	0.42	1	0.922289	0.86148
Stx6	0.002493	-0.0607783	0.206	0.261	1	0.421821	0.361043
Nbea	0.000225023	-0.0607451	0.077	0.12	1	0.192192	0.131447
Hif1a	0.0216035	-0.0606766	0.283	0.328	1	0.66542	0.604744
Rlf	0.000488025	-0.0606741	0.07	0.107	1	0.16804	0.107366
Itgb4	0.000251321	-0.0606629	0.074	0.117	1	0.236607	0.175944
Rad50	0.000199421	-0.0606252	0.076	0.119	1	0.196269	0.135644
Myl4	6.36506e-06	-0.0605272	0.074	0.127	0.12641	0.224333	0.163805
Ahdc1	0.000278261	-0.0604709	0.076	0.118	1	0.181255	0.120784
Dut	1.28514e-05	-0.0604594	0.099	0.158	0.25523	0.245111	0.184652
Rps4x	0.00148176	-0.0604543	0.994	0.995	1	3.19268	3.13223
Zhx1	0.00631452	-0.0604528	0.123	0.161	1	0.27686	0.216407
Polr3d	0.000126211	-0.0604377	0.104	0.155	1	0.247422	0.186984
Prkacb	0.0135999	-0.0604083	0.201	0.245	1	0.416487	0.356078
Cbfb	0.00308654	-0.0602514	0.253	0.312	1	0.501728	0.441477
Mettl2	0.000333479	-0.0601478	0.074	0.115	1	0.193572	0.133424
Sesn1	0.00148066	-0.0601336	0.085	0.123	1	0.20848	0.148347
Smg1	0.00517895	-0.0600938	0.147	0.189	1	0.302081	0.241987
Slc12a6	0.00167645	-0.0598424	0.129	0.173	1	0.272935	0.213092
Mtss1l	0.00100612	-0.0598394	0.077	0.114	1	0.182691	0.122852
Pggt1b	2.66239e-05	-0.0598286	0.065	0.111	0.528751	0.176886	0.117057
Chst2	0.0227511	-0.0597746	0.085	0.111	1	0.258429	0.198655
Casp8ap2	0.0136995	-0.0597591	0.101	0.131	1	0.229191	0.169432
Tcf7l1	0.000144764	-0.0597159	0.121	0.176	1	0.276569	0.216853
Pigp	0.00900452	-0.0597061	0.316	0.37	1	0.617828	0.558122
Sfswap	0.000373907	-0.059609	0.124	0.175	1	0.27798	0.218371
Ddx50	0.00683534	-0.0595793	0.265	0.316	1	0.511172	0.451593
Prrc2b	0.00326969	-0.0595666	0.262	0.32	1	0.521475	0.461908
Gspt1	0.0504634	-0.0594278	0.258	0.296	1	0.494306	0.434878
Ubn1	0.0202918	-0.0593878	0.312	0.358	1	0.602059	0.542671
Fam114a1	0.000790571	-0.0593639	0.081	0.121	1	0.198287	0.138923
Ctdspl2	0.00015203	-0.0593128	0.084	0.13	1	0.206964	0.147651
B3gnt2	0.0121031	-0.0592761	0.352	0.411	1	0.759	0.699723
Klk8	0.0374709	-0.0592752	0.21	0.246	1	0.514799	0.455523
Wdfy1	0.000523118	-0.0592337	0.083	0.125	1	0.201168	0.141934
Ube2j2	0.00992451	-0.0592053	0.265	0.313	1	0.49911	0.439905
Dnajc14	0.00131597	-0.0591171	0.196	0.254	1	0.399919	0.340801
Tmem123	0.0377386	-0.0590874	0.47	0.528	1	0.907113	0.848025
Sumo1	0.0199616	-0.0590703	0.682	0.733	1	1.26626	1.20719
Uvrag	0.00402122	-0.0589536	0.131	0.173	1	0.290183	0.231229
Slc35e4	0.139134	-0.0589531	0.19	0.211	1	0.41292	0.353967
Nup214	0.0063172	-0.0589002	0.082	0.112	1	0.192931	0.134031
Synpo	0.00950173	-0.0588943	0.197	0.244	1	0.475485	0.416591
Ncoa2	0.000434854	-0.0588901	0.069	0.107	1	0.169267	0.110377
Gigyf2	0.000196247	-0.0588345	0.073	0.116	1	0.18873	0.129895
Ctnnbip1	0.0959186	-0.0587707	0.357	0.391	1	0.878555	0.819784
Mtf1	0.000820018	-0.0587389	0.106	0.15	1	0.247101	0.188362
Wdr37	0.000548706	-0.0587311	0.16	0.217	1	0.345766	0.287035
Oxr1	0.0283847	-0.0586035	0.26	0.303	1	0.514328	0.455724
AI314180	0.00144714	-0.05854	0.093	0.132	1	0.209499	0.150959
Crk	0.0310271	-0.058499	0.445	0.493	1	0.845127	0.786628
Senp1	0.000546209	-0.0584969	0.087	0.128	1	0.197305	0.138808
Ncoa7	0.00744521	-0.0584739	0.233	0.283	1	0.531536	0.473062
Tbc1d8	0.00219847	-0.0584587	0.112	0.154	1	0.255363	0.196904
Zrsr2	0.0011853	-0.0583842	0.199	0.258	1	0.405815	0.347431
Zfp266	0.000116633	-0.0583508	0.076	0.121	1	0.185339	0.126988
Ids	0.00357534	-0.0582953	0.141	0.184	1	0.28974	0.231445
Pmepa1	0.0197325	-0.0582848	0.129	0.161	1	0.288207	0.229922
Atad2b	0.00221313	-0.0580662	0.077	0.11	1	0.179702	0.121636
Gm14326	0.000827892	-0.0580371	0.069	0.105	1	0.169154	0.111117
Acp2	0.00209879	-0.0580267	0.075	0.109	1	0.180165	0.122138
Zfp560	2.52571e-06	-0.0579581	0.077	0.133	0.0501607	0.195432	0.137474
Htatsf1	0.00284063	-0.0579522	0.117	0.158	1	0.255519	0.197567
Fto	0.00192396	-0.0579381	0.116	0.158	1	0.239263	0.181325
Tsnax	0.000200466	-0.0578577	0.273	0.351	1	0.605265	0.547407
Sh3pxd2a	0.00184678	-0.0578362	0.156	0.204	1	0.329712	0.271876
Arl5a	0.00186003	-0.0577924	0.138	0.183	1	0.281772	0.223979
Cd93	2.06133e-05	-0.0577605	0.733	0.812	0.40938	2.01737	1.95961
Grb10	0.00017614	-0.0576981	0.194	0.263	1	0.426813	0.369115
Ahctf1	0.0105578	-0.0576294	0.129	0.164	1	0.270461	0.212832
Rnps1	0.0198061	-0.0576047	0.257	0.303	1	0.493631	0.436026
Tmx4	6.64449e-05	-0.0575469	0.063	0.105	1	0.168738	0.111191
Ttc9c	0.000429097	-0.0574955	0.071	0.11	1	0.181979	0.124484
4933421E11Rik	0.00208499	-0.0574538	0.128	0.173	1	0.287652	0.230198
Cab39	0.0616726	-0.0573429	0.273	0.311	1	0.524233	0.46689
Aamp	0.0464872	-0.0572335	0.443	0.485	1	0.81119	0.753956
Atp9b	0.000258624	-0.0571761	0.081	0.124	1	0.19124	0.134064
Hnrnpab	0.0476895	-0.0571227	0.526	0.581	1	1.01249	0.955367
B430010I23Rik	0.409484	-0.0570898	0.117	0.127	1	0.297314	0.240224
Arfgef1	0.000429336	-0.0570766	0.14	0.193	1	0.296199	0.239123
Nars	0.0104625	-0.0570602	0.304	0.357	1	0.583546	0.526486
Pnn	0.00890013	-0.0570381	0.284	0.34	1	0.578608	0.52157
Grk5	0.00161405	-0.0570295	0.154	0.203	1	0.319677	0.262647
Esf1	0.000233245	-0.0570271	0.182	0.247	1	0.397997	0.34097
Ddx26b	0.0015679	-0.0569428	0.069	0.103	1	0.173557	0.116614
A630007B06Rik	0.00108258	-0.0569201	0.078	0.115	1	0.192292	0.135372
5730508B09Rik	0.00436052	-0.0568831	0.12	0.16	1	0.275812	0.218929
Churc1	0.0133277	-0.0568788	0.366	0.423	1	0.674267	0.617388
Gstt3	0.000124809	-0.0568539	0.113	0.166	1	0.258253	0.201399
Cul4b	0.00014707	-0.0567759	0.079	0.124	1	0.189114	0.132338
Ptger4	0.00421955	-0.056762	0.129	0.169	1	0.374094	0.317332
Cdc27	0.000140565	-0.0567542	0.081	0.126	1	0.194246	0.137492
Hcfc1	0.000270912	-0.0567463	0.155	0.214	1	0.318308	0.261562
Zfp329	0.00147026	-0.0567359	0.075	0.111	1	0.190512	0.133776
Ckap5	0.0032341	-0.056639	0.084	0.119	1	0.198731	0.142092
Map2k7	0.000573534	-0.0565346	0.1	0.144	1	0.217016	0.160482
Dll1	0.0160907	-0.0565076	0.205	0.248	1	0.529674	0.473166
Phf21a	0.000364027	-0.056488	0.142	0.198	1	0.302523	0.246035
Ube4b	0.000106998	-0.0564044	0.114	0.168	1	0.249204	0.192799
Ppp2r3c	0.00545896	-0.0564023	0.11	0.147	1	0.245224	0.188821
Eif3c	0.019553	-0.0563965	0.45	0.503	1	0.836279	0.779882
Usp36	6.49584e-05	-0.0563965	0.069	0.114	1	0.172394	0.115998
Stat5b	0.000306568	-0.0563922	0.131	0.184	1	0.271773	0.215381
Etl4	0.00367292	-0.0563663	0.275	0.334	1	0.597672	0.541306
Zmym2	0.00121451	-0.0562652	0.105	0.148	1	0.230619	0.174353
Csnk1g2	0.00690444	-0.0562496	0.247	0.302	1	0.472865	0.416615
Mtif2	0.00679992	-0.05624	0.111	0.146	1	0.24618	0.18994
Dync1li2	0.00948063	-0.0562134	0.199	0.244	1	0.409578	0.353365
C630004H02Rik	1.00338e-05	-0.056201	0.083	0.138	0.199272	0.204965	0.148764
Cdk17	0.00826914	-0.0561891	0.281	0.334	1	0.542117	0.485928
Vkorc1	0.0223335	-0.0561795	0.33	0.382	1	0.626409	0.57023
Rexo1	0.0155955	-0.0561586	0.154	0.19	1	0.319668	0.26351
Tbc1d9b	0.00777849	-0.0561561	0.174	0.217	1	0.352716	0.29656
Arf4	0.0650561	-0.0561448	0.69	0.744	1	1.3259	1.26976
Lman1	0.00688535	-0.0560702	0.318	0.373	1	0.631998	0.575928
Clk4	0.00532278	-0.0560678	0.216	0.266	1	0.438325	0.382257
Dlg1	0.00132258	-0.0560287	0.093	0.133	1	0.215434	0.159405
2900053A13Rik	0.0182813	-0.0560094	0.348	0.404	1	0.650647	0.594638
Man2a1	0.00423445	-0.055956	0.238	0.292	1	0.483987	0.428031
Gtf2i	0.00159147	-0.055926	0.231	0.291	1	0.46462	0.408694
Crtc2	0.00635448	-0.0558977	0.162	0.205	1	0.345961	0.290063
Stk3	0.00512538	-0.055853	0.107	0.143	1	0.23462	0.178767
Foxp1	9.90813e-08	-0.0558374	0.565	0.692	0.00196775	1.51454	1.4587
Igtp	0.14204	-0.0558235	0.287	0.32	1	0.665224	0.6094
Cdk14	0.0496551	-0.0557972	0.138	0.166	1	0.323033	0.267236
Yipf5	0.00603615	-0.0557825	0.24	0.293	1	0.466188	0.410405
Mier3	0.00139569	-0.0557222	0.079	0.116	1	0.192925	0.137203
Esco1	0.00232757	-0.0557109	0.095	0.133	1	0.220908	0.165197
Ccdc86	0.0456833	-0.0557012	0.111	0.136	1	0.254938	0.199237
Abcc5	0.000710607	-0.0556524	0.091	0.133	1	0.202399	0.146747
C1ra	0.0037833	-0.0555653	0.09	0.125	1	0.213561	0.157996
Otud4	0.00558157	-0.0555312	0.126	0.165	1	0.261081	0.205549
BC016423	0.000421829	-0.0554508	0.075	0.116	1	0.183958	0.128507
Nop56	0.0201179	-0.0554444	0.285	0.334	1	0.579899	0.524454
Adamts10	0.000536273	-0.0554403	0.097	0.141	1	0.226592	0.171152
Mllt3	1.65766e-06	-0.0554268	0.061	0.114	0.0329211	0.173773	0.118346
Jag1	0.00877223	-0.0554162	0.146	0.188	1	0.38528	0.329864
Isca1	0.0154303	-0.05541	0.284	0.332	1	0.559634	0.504224
Fubp3	0.000269887	-0.0553932	0.103	0.151	1	0.238362	0.182969
Actn1	0.899331	-0.0553911	0.447	0.448	1	0.9957	0.940309
4930523C07Rik	0.37216	-0.0553826	0.442	0.462	1	0.921039	0.865656
Ep400	0.00297003	-0.0553714	0.195	0.247	1	0.388706	0.333335
Pink1	0.00817018	-0.055347	0.377	0.436	1	0.71933	0.663983
2610305D13Rik	0.0146308	-0.0551761	0.174	0.216	1	0.398013	0.342837
Rnpc3	0.00204142	-0.0551667	0.075	0.109	1	0.182259	0.127092
Acsl4	0.00324644	-0.0551585	0.072	0.103	1	0.167722	0.112564
Iars2	0.000845005	-0.0551436	0.101	0.144	1	0.226645	0.171502
Mapk1ip1l	0.00139467	-0.0550595	0.2	0.255	1	0.398932	0.343873
Casp12	0.000119585	-0.0550484	0.1	0.152	1	0.240755	0.185706
Impact	0.0173164	-0.0550297	0.137	0.171	1	0.306996	0.251966
Naf1	0.00636511	-0.055026	0.086	0.118	1	0.204639	0.149613
D15Ertd621e	0.00721737	-0.0550212	0.113	0.149	1	0.244266	0.189245
Ino80d	0.000391746	-0.0549956	0.167	0.226	1	0.350024	0.295029
Brd7	0.00250584	-0.0549919	0.168	0.219	1	0.343372	0.28838
Fam126b	0.000212288	-0.0549798	0.078	0.122	1	0.194591	0.139611
Ncald	0.148499	-0.0549459	0.152	0.171	1	0.412457	0.357511
Cyp26b1	0.011862	-0.0549374	0.095	0.127	1	0.306713	0.251775
Akt1	0.0942168	-0.054931	0.328	0.357	1	0.603037	0.548106
Angel2	0.00539863	-0.0549306	0.199	0.249	1	0.403757	0.348826
AI597468	0.00767915	-0.0548803	0.12	0.156	1	0.251994	0.197114
Slc39a10	0.012358	-0.0548772	0.128	0.163	1	0.290287	0.23541
Fam107b	0.0695275	-0.0548698	0.083	0.103	1	0.204203	0.149333
Vamp2	0.0106718	-0.0548577	0.253	0.303	1	0.497209	0.442351
Kctd12	0.0638113	-0.0548504	0.38	0.421	1	0.799505	0.744655
C1qtnf1	0.00362757	-0.0548265	0.077	0.11	1	0.187847	0.13302
Tnrc6c	0.00762199	-0.0548035	0.175	0.22	1	0.355365	0.300562
Hnrnpul2	0.00689679	-0.0547242	0.301	0.357	1	0.566615	0.511891
Edn1	0.40889	-0.0547211	0.265	0.277	1	1.14758	1.09286
March6	0.00456793	-0.0547197	0.203	0.254	1	0.412899	0.35818
Igf1	1.64281e-05	-0.0546975	0.062	0.107	0.326261	0.214633	0.159935
4931406P16Rik	0.019743	-0.0546921	0.46	0.516	1	0.90103	0.846338
Wipf2	0.000727861	-0.0546789	0.104	0.149	1	0.234318	0.179639
1810074P20Rik	0.0283201	-0.0546671	0.148	0.181	1	0.316697	0.26203
Zswim6	0.00475848	-0.0546261	0.132	0.173	1	0.298111	0.243485
Pik3c2b	0.000113316	-0.0545955	0.069	0.111	1	0.171316	0.11672
Msl3	0.0350912	-0.0545787	0.143	0.172	1	0.295544	0.240965
Tcerg1	0.00205797	-0.0545537	0.12	0.163	1	0.252253	0.1977
Zfp260	0.000752949	-0.0544102	0.106	0.151	1	0.238153	0.183743
Rad23a	0.0124854	-0.0543941	0.33	0.387	1	0.625401	0.571007
Smarcc1	0.000426942	-0.0542827	0.07	0.108	1	0.162709	0.108426
Mtf2	0.000606492	-0.0541728	0.136	0.189	1	0.300979	0.246806
Etv6	0.0806388	-0.0541497	0.12	0.14	1	0.250757	0.196608
Odf2	0.00210615	-0.0540574	0.101	0.14	1	0.225095	0.171037
Map3k2	0.000114177	-0.0540527	0.087	0.135	1	0.207164	0.153112
Socs2	0.0115307	-0.0539997	0.425	0.486	1	0.981593	0.927593
0610011L14Rik	0.00568317	-0.0539549	0.114	0.151	1	0.250387	0.196433
Hmg20a	0.000616046	-0.0539351	0.082	0.123	1	0.189445	0.13551
Slco3a1	0.0870866	-0.0539323	0.245	0.278	1	0.516732	0.462799
Ywhaz	0.18816	-0.0538991	0.639	0.686	1	1.20808	1.15418
Lmo1	0.054346	-0.0538734	0.258	0.292	1	0.667762	0.613888
Smarcc2	0.00278648	-0.0538185	0.212	0.266	1	0.414227	0.360409
Ppme1	0.0135513	-0.0537179	0.133	0.167	1	0.284661	0.230943
Fam133b	0.00938207	-0.0537149	0.192	0.237	1	0.392492	0.338777
Dag1	0.000245954	-0.0536993	0.069	0.109	1	0.164114	0.110414
Ssfa2	0.000863983	-0.053678	0.194	0.255	1	0.423209	0.369531
Rprd1b	0.00499399	-0.0536316	0.099	0.134	1	0.224195	0.170563
Ube2r2	0.00932076	-0.0536213	0.399	0.466	1	0.74036	0.686739
Mapre3	0.00170395	-0.053606	0.096	0.135	1	0.225528	0.171922
Mettl6	0.000666407	-0.0535939	0.065	0.102	1	0.17329	0.119696
Leng8	0.0057649	-0.0535479	0.205	0.255	1	0.419404	0.365856
Ppm1h	0.000192592	-0.0534975	0.091	0.138	1	0.219241	0.165743
Prpf4	0.0022114	-0.0534944	0.103	0.142	1	0.231593	0.178099
Clic5	0.146979	-0.0534384	0.542	0.508	1	1.20175	1.14831
Phactr1	0.0159892	-0.0533935	0.117	0.15	1	0.264678	0.211285
Btbd9	0.00120837	-0.0533866	0.106	0.15	1	0.24274	0.189353
Fam53c	6.19192e-05	-0.0533224	0.088	0.139	1	0.211406	0.158084
Fam162a	0.761216	-0.053321	0.323	0.326	1	0.630562	0.577241
Cdc42bpb	0.0540873	-0.0532883	0.296	0.332	1	0.553468	0.50018
2810013P06Rik	0.0235313	-0.0532696	0.151	0.186	1	0.340281	0.287011
Sidt2	0.00806183	-0.0531449	0.144	0.183	1	0.283113	0.229968
Zyg11b	0.000642389	-0.0531419	0.118	0.167	1	0.255098	0.201957
Faf1	0.017999	-0.053141	0.171	0.209	1	0.345404	0.292263
1700081L11Rik	0.00212433	-0.0530675	0.172	0.224	1	0.34559	0.292523
Smad4	0.00874545	-0.0530392	0.166	0.207	1	0.329039	0.276
Trim33	6.38771e-06	-0.0530029	0.071	0.124	0.12686	0.173152	0.120149
Ercc5	0.000184111	-0.0529714	0.075	0.119	1	0.190372	0.137401
Sc4mol	0.0504581	-0.0528506	0.095	0.119	1	0.215997	0.163147
Prdm16	0.0174386	-0.0528488	0.113	0.144	1	0.289017	0.236169
Tmod3	0.0304343	-0.0528078	0.565	0.607	1	1.06133	1.00853
Athl1	0.0001272	-0.0528007	0.065	0.107	1	0.173542	0.120742
Rpl30	0.0173967	-0.05278	0.116	0.147	1	0.243051	0.190271
Dnajc5	0.00211672	-0.0527529	0.178	0.23	1	0.358652	0.305899
Usp1	0.008719	-0.0527365	0.162	0.204	1	0.334862	0.282125
Senp3	0.00208814	-0.0527159	0.145	0.192	1	0.291252	0.238536
Bod1l	0.00395759	-0.0527159	0.28	0.341	1	0.555814	0.503098
Glul	0.905973	-0.0527013	0.59	0.592	1	1.41659	1.36389
Phf15	0.101603	-0.0526738	0.132	0.155	1	0.289709	0.237035
Ythdf2	0.0167757	-0.052599	0.241	0.287	1	0.473579	0.42098
Plekhg2	0.0043252	-0.0525923	0.141	0.185	1	0.313512	0.26092
Capn7	6.95724e-05	-0.0525855	0.071	0.117	1	0.176676	0.124091
Exoc5	0.00895275	-0.0525672	0.211	0.256	1	0.412304	0.359737
Wrn	0.00028825	-0.0524542	0.072	0.112	1	0.173308	0.120853
Maoa	0.0132474	-0.0524368	0.177	0.219	1	0.416688	0.364252
Dusp2	0.0101034	-0.0523061	0.148	0.19	1	0.569779	0.517472
Rnf130	0.0373907	-0.0523029	0.43	0.479	1	0.797946	0.745643
Hspa5	0.061945	-0.0522773	0.851	0.871	1	2.05436	2.00208
Kdm1a	0.000419562	-0.0522654	0.134	0.189	1	0.280827	0.228562
Klhl9	0.012779	-0.0522614	0.196	0.236	1	0.377174	0.324913
Mdm2	0.032807	-0.0522613	0.249	0.289	1	0.481729	0.429468
Gnai3	0.304025	-0.0522195	0.421	0.442	1	0.770507	0.718287
Pnpla8	0.0713912	-0.0522035	0.233	0.267	1	0.448725	0.396521
Styx	0.00126932	-0.0522034	0.171	0.224	1	0.366509	0.314305
2410002F23Rik	0.000706464	-0.0522003	0.077	0.116	1	0.199329	0.147128
Socs3	0.0157598	-0.0521704	0.641	0.676	1	2.26837	2.21619
Abi3bp	0.221727	-0.0521244	0.132	0.148	1	0.367058	0.314934
Khdrbs1	0.075639	-0.0520899	0.399	0.445	1	0.715012	0.662922
Ing2	0.000616568	-0.0520487	0.18	0.238	1	0.424088	0.372039
Msl1	0.00255791	-0.0520455	0.216	0.272	1	0.437235	0.38519
Rps26	0.00067162	-0.0520318	0.956	0.966	1	2.42512	2.37309
Arhgap25	0.00329975	-0.0520233	0.093	0.129	1	0.21174	0.159717
Rps19-ps3	0.00260974	-0.0519679	0.083	0.119	1	0.175086	0.123118
Mtmr3	0.00138305	-0.0519031	0.134	0.183	1	0.280669	0.228765
Atxn2	0.00442373	-0.0518776	0.115	0.154	1	0.237289	0.185411
Kif3a	0.00237489	-0.0518586	0.072	0.105	1	0.168921	0.117062
Gpr4	0.0499295	-0.0518582	0.278	0.321	1	0.606587	0.554729
Tmem9	0.00578802	-0.0518201	0.122	0.16	1	0.265104	0.213284
Habp4	2.4599e-05	-0.0517793	0.07	0.118	0.488537	0.173188	0.121408
Pias2	0.00803954	-0.0517401	0.108	0.142	1	0.224513	0.172773
Tnfaip8l1	0.0101027	-0.0517399	0.143	0.182	1	0.398526	0.346786
Ppid	0.0268656	-0.0517152	0.24	0.281	1	0.45562	0.403905
Tlr3	0.0122838	-0.0517129	0.115	0.149	1	0.261318	0.209605
Myo1b	0.00226107	-0.0516507	0.176	0.227	1	0.385498	0.333848
Phf6	0.0022788	-0.0516387	0.09	0.128	1	0.217096	0.165458
Prkrir	0.000847702	-0.051555	0.149	0.201	1	0.309124	0.257569
Siah2	0.0043167	-0.0515389	0.152	0.197	1	0.343916	0.292377
Ipo5	0.0229281	-0.0515284	0.128	0.159	1	0.257579	0.206051
Mgrn1	0.00189744	-0.051523	0.16	0.208	1	0.321921	0.270398
Tmpo	0.0483021	-0.0515166	0.402	0.443	1	0.755646	0.704129
Hfe	0.0133542	-0.0514802	0.235	0.28	1	0.477642	0.426162
Ctdp1	0.00107585	-0.0514786	0.07	0.106	1	0.173283	0.121805
Ywhag	0.0148281	-0.0514659	0.272	0.318	1	0.515851	0.464385
Cx3cl1	0.0035788	-0.051465	0.17	0.22	1	0.409826	0.358361
Ppp6r3	0.00850053	-0.0514347	0.175	0.218	1	0.350331	0.298896
Fbxw7	0.018274	-0.0514311	0.112	0.142	1	0.238871	0.18744
Armc8	0.00151545	-0.0513963	0.117	0.161	1	0.246217	0.194821
Srpk2	0.00184556	-0.0513702	0.136	0.183	1	0.280553	0.229183
Stt3a	0.00378767	-0.0513647	0.255	0.315	1	0.499168	0.447803
Rpl36a	0.00888254	-0.0513505	0.965	0.961	1	2.58019	2.52884
Rnf111	0.00632725	-0.0513363	0.11	0.146	1	0.226865	0.175528
Smyd2	0.000593718	-0.0513209	0.099	0.146	1	0.231646	0.180326
Cpsf6	0.00277524	-0.0513118	0.197	0.249	1	0.381805	0.330493
Adnp	0.00373549	-0.0513037	0.138	0.181	1	0.29192	0.240616
Snrnp200	0.00143254	-0.0512849	0.15	0.201	1	0.302794	0.251509
Osmr	0.232547	-0.0512552	0.376	0.405	1	0.860976	0.809721
2310037I24Rik	0.00221016	-0.0512223	0.091	0.129	1	0.200576	0.149354
Slc12a7	0.0100539	-0.0510931	0.188	0.232	1	0.398715	0.347622
Dpcd	0.0040417	-0.0510562	0.128	0.168	1	0.271714	0.220657
Mll2	0.00413451	-0.0509578	0.175	0.222	1	0.354777	0.303819
Mnat1	0.00169756	-0.0508876	0.147	0.197	1	0.305357	0.25447
Fzd6	0.0138224	-0.0507744	0.179	0.219	1	0.372254	0.32148
Numa1	0.0232773	-0.0507575	0.206	0.247	1	0.409565	0.358808
Serpinb9	0.155257	-0.0506904	0.307	0.341	1	0.646632	0.595942
Spata13	0.00329029	-0.0506843	0.114	0.154	1	0.243584	0.192899
Gm2382	0.00204476	-0.0506191	0.134	0.182	1	0.279568	0.228949
Cadm1	0.464049	-0.0505851	0.17	0.179	1	0.463404	0.412818
Usp22	0.00122538	-0.0505476	0.129	0.176	1	0.272326	0.221779
Pnkd	0.079672	-0.0505469	0.44	0.473	1	0.812985	0.762438
Foxn2	0.0242541	-0.0505226	0.105	0.133	1	0.223547	0.173024
Sh3rf1	0.000232823	-0.0504925	0.08	0.124	1	0.191775	0.141282
Ndufs5	0.0215379	-0.0503848	0.091	0.118	1	0.208875	0.15849
Fam13c	0.000454638	-0.0503592	0.12	0.17	1	0.288398	0.238039
Inpp4a	0.00714173	-0.050346	0.097	0.129	1	0.215586	0.16524
Tmem2	0.000159724	-0.0503065	0.399	0.488	1	1.11587	1.06557
Rcbtb2	0.00186666	-0.0502275	0.109	0.151	1	0.233962	0.183735
Spast	0.00341582	-0.0501964	0.079	0.112	1	0.178647	0.128451
Aebp2	0.00865783	-0.0500797	0.131	0.167	1	0.26247	0.21239
Ankrd50	0.0986101	-0.0500541	0.131	0.154	1	0.28193	0.231876
Nxf1	0.00524437	-0.0500299	0.183	0.231	1	0.369793	0.319763
Dnajc4	0.00328057	-0.0499751	0.124	0.167	1	0.269698	0.219722
4933439F18Rik	0.00169775	-0.0499181	0.094	0.133	1	0.212572	0.162654
Sfpq	0.0603005	-0.0498993	0.534	0.574	1	0.995465	0.945566
Smap2	0.00184477	-0.0498802	0.17	0.221	1	0.337249	0.287369
Rpl13a	0.000106991	-0.0498751	0.998	0.998	1	3.44213	3.39225
Mcts1	0.0393119	-0.0498114	0.257	0.295	1	0.477174	0.427363
Cd55	0.000668834	-0.0497852	0.078	0.118	1	0.203561	0.153776
Dcun1d1	0.00933141	-0.049771	0.148	0.188	1	0.305692	0.255921
Cnksr3	0.00347503	-0.0497612	0.107	0.147	1	0.260529	0.210767
Snx14	0.0019312	-0.049737	0.07	0.103	1	0.164856	0.115119
Pdcd7	0.00720429	-0.049731	0.132	0.171	1	0.290814	0.241083
Ankle2	0.041933	-0.0497142	0.103	0.128	1	0.222814	0.1731
Dand5	5.21771e-05	-0.0497094	0.058	0.101	1	0.151114	0.101405
Pafah1b2	0.0195258	-0.0496782	0.288	0.34	1	0.535746	0.486068
Ppp1r9b	0.0950161	-0.0496176	0.264	0.3	1	0.516256	0.466639
Maml1	0.00174824	-0.0495633	0.096	0.136	1	0.21412	0.164556
Nxn	0.00225158	-0.0495367	0.245	0.303	1	0.526192	0.476655
Eps8l2	0.0439499	-0.0494978	0.09	0.114	1	0.27045	0.220952
Ntn1	0.0052206	-0.0494512	0.201	0.249	1	0.507082	0.457631
Srf	0.00950774	-0.0494103	0.159	0.198	1	0.346044	0.296634
Evi5	0.00207945	-0.0493409	0.198	0.254	1	0.408612	0.359271
Rps23	0.00129617	-0.0492671	0.998	0.999	1	3.51418	3.46491
Dnajb4	0.000704166	-0.0491508	0.196	0.254	1	0.467495	0.418344
Tm2d1	0.0267696	-0.0491433	0.352	0.408	1	0.648641	0.599498
Epb4.1l2	0.0485238	-0.0491402	0.3	0.344	1	0.580657	0.531517
Ccdc102a	0.000219536	-0.0491061	0.107	0.158	1	0.234159	0.185053
Use1	0.038902	-0.049059	0.599	0.636	1	1.13626	1.08721
Ralgapa1	0.0172196	-0.0490351	0.196	0.239	1	0.395911	0.346876
Upf1	0.00364944	-0.0490308	0.143	0.187	1	0.292436	0.243405
Sec31a	0.00418044	-0.0490135	0.255	0.313	1	0.491048	0.442034
Smarca4	0.000282175	-0.0489245	0.21	0.279	1	0.422499	0.373575
Dennd3	0.13236	-0.0488837	0.228	0.256	1	0.462743	0.413859
Cnot3	0.00297219	-0.048875	0.163	0.212	1	0.325585	0.27671
Tnks1bp1	0.0213029	-0.0488624	0.189	0.228	1	0.367988	0.319126
Cast	0.00450376	-0.0488584	0.177	0.223	1	0.356367	0.307509
Gm3219	0.000648992	-0.0488524	0.107	0.153	1	0.226452	0.1776
Dusp16	0.0030248	-0.0487484	0.074	0.107	1	0.175658	0.12691
Atn1	0.000130261	-0.0487405	0.119	0.174	1	0.251799	0.203058
Rnf138	0.00740699	-0.0487346	0.222	0.27	1	0.457823	0.409088
Ehd3	0.987521	-0.0487063	0.143	0.143	1	0.529481	0.480775
Efr3a	0.00190943	-0.0486884	0.189	0.246	1	0.387921	0.339233
Ing3	0.0289333	-0.048563	0.134	0.164	1	0.269819	0.221256
Ptprg	0.05878	-0.0485326	0.342	0.384	1	0.680025	0.631492
Nudt13	0.00391995	-0.0485054	0.075	0.107	1	0.178756	0.130251
Rps3	5.76194e-06	-0.0485029	0.989	0.987	0.114432	3.05554	3.00704
Tmed3	0.0757502	-0.0484801	0.42	0.459	1	0.77225	0.72377
Pcyox1	0.000669396	-0.0484281	0.1	0.146	1	0.223473	0.175045
Gclc	0.0698047	-0.0484142	0.128	0.153	1	0.286628	0.238214
Ubxn7	0.000638285	-0.048408	0.071	0.108	1	0.161524	0.113116
Tifa	0.00646445	-0.0483797	0.171	0.217	1	0.542017	0.493638
Deaf1	0.00234591	-0.0483484	0.081	0.117	1	0.187199	0.13885
Aimp1	0.0388544	-0.0483437	0.282	0.326	1	0.519977	0.471633
Endod1	0.12558	-0.0483375	0.16	0.182	1	0.328215	0.279878
Acsf2	0.00849484	-0.0482603	0.116	0.152	1	0.258337	0.210077
Synj1	0.0503664	-0.0482498	0.175	0.206	1	0.345725	0.297475
Glod4	0.0400001	-0.0482096	0.274	0.314	1	0.521631	0.473421
Caprin1	0.0628714	-0.0481708	0.343	0.387	1	0.629708	0.581537
Fnip1	0.0376161	-0.0481567	0.117	0.144	1	0.255184	0.207027
Rnf145	0.0159615	-0.04815	0.183	0.225	1	0.371789	0.323639
Ppp1r15b	0.0314399	-0.0480856	0.201	0.238	1	0.382584	0.334498
Cdh5	0.799849	-0.048079	0.945	0.943	1	2.43873	2.39065
Brd8	0.0207165	-0.0480542	0.167	0.203	1	0.336889	0.288835
Nfatc3	0.00023772	-0.0480189	0.084	0.129	1	0.187911	0.139892
Pard3b	0.00434573	-0.0480135	0.082	0.116	1	0.210608	0.162594
Mapre2	0.20137	-0.048001	0.239	0.262	1	0.462352	0.414351
Sec24c	0.0103751	-0.0479612	0.151	0.19	1	0.303672	0.255711
Vps41	0.00914484	-0.0478984	0.131	0.168	1	0.267722	0.219824
Pkd2	0.000302632	-0.0478859	0.148	0.207	1	0.306807	0.258921
Mapk8	0.00230199	-0.0477549	0.075	0.109	1	0.176294	0.128539
Fbxl17	0.000431047	-0.0477397	0.132	0.186	1	0.276091	0.228351
Rc3h1	0.0373697	-0.047694	0.187	0.222	1	0.360912	0.313218
Foxj3	0.00617754	-0.0476646	0.08	0.111	1	0.182165	0.1345
2810001G20Rik	0.000711863	-0.0476137	0.07	0.107	1	0.174814	0.1272
9430020K01Rik	0.0150703	-0.0475879	0.38	0.437	1	0.78119	0.733602
Ubac2	0.0272424	-0.0475693	0.201	0.24	1	0.390634	0.343065
Hmgn5	0.00290628	-0.0475519	0.142	0.188	1	0.308692	0.26114
Ptprm	0.00522036	-0.0475186	0.297	0.36	1	0.606316	0.558797
2810002N01Rik	0.000145961	-0.0474985	0.192	0.262	1	0.38414	0.336641
Megf8	0.000103537	-0.0474238	0.065	0.108	1	0.152844	0.10542
Phc3	0.000511612	-0.0474199	0.097	0.142	1	0.221539	0.174119
Rbm33	0.000188588	-0.0473331	0.086	0.132	1	0.197208	0.149875
Cdyl	0.00143692	-0.047323	0.087	0.126	1	0.208897	0.161574
Cd320	4.40933e-05	-0.0473196	0.083	0.134	0.875693	0.201694	0.154375
Prpf8	0.0475892	-0.0472965	0.24	0.279	1	0.462294	0.414998
Gpatch8	0.0259727	-0.0472448	0.177	0.213	1	0.341447	0.294202
Gar1	0.0243102	-0.0471392	0.241	0.287	1	0.462158	0.415019
Aldh6a1	0.000715217	-0.0470442	0.092	0.135	1	0.215352	0.168308
[truncated: 4,658 more rows]
